# Supplementary material for: Characteristics of patients attached to near-retirement family physicians: a population-based serial cross-sectional study in Ontario, Canada
Source: PubMed Central journal article supplement — BMJ Open. 2023 Dec 7;13(12):e074120. doi: 10.1136/bmjopen-2023-074120 (PMC10711930; doi:10.1136/bmjopen-2023-074120), 2023-12-07
Supplement: bmjopen-2023-074120.draft_revisions.pdf [file bmjopen-2023-074120.draft_revisions.pdf]

# BMJ Open

BMJ Open is committed to open peer review. As part of this commitment we make the peer review history of every article we publish publicly available.

When an article is published we post the peer reviewers' comments and the authors' responses online. We also post the versions of the paper that were used during peer review. These are the versions that the peer review comments apply to.

The versions of the paper that follow are the versions that were submitted during the peer review process. They are not the versions of record or the final published versions. They should not be cited or distributed as the published version of this manuscript.

BMJ Open is an open access journal and the full, final, typeset and author-corrected version of record of the manuscript is available on our site with no access controls, subscription charges or pay-per-view fees (<http://bmjopen.bmj.com>).

If you have any questions on BMJ Open's open peer review process please email [info.bmjopen@bmj.com](mailto:info.bmjopen@bmj.com)

# BMJ Open

## Trends in patient attachment to an aging primary care workforce: a population-based serial cross-sectional study in Ontario, Canada

|                               |                                                                                                                                                                                                                                                                                                                                                                                                                                                                                                                                                                                                                                                |
|-------------------------------|------------------------------------------------------------------------------------------------------------------------------------------------------------------------------------------------------------------------------------------------------------------------------------------------------------------------------------------------------------------------------------------------------------------------------------------------------------------------------------------------------------------------------------------------------------------------------------------------------------------------------------------------|
| Journal:                      | <i>BMJ Open</i>                                                                                                                                                                                                                                                                                                                                                                                                                                                                                                                                                                                                                                |
| Manuscript ID                 | bmjopen-2023-074120                                                                                                                                                                                                                                                                                                                                                                                                                                                                                                                                                                                                                            |
| Article Type:                 | Original research                                                                                                                                                                                                                                                                                                                                                                                                                                                                                                                                                                                                                              |
| Date Submitted by the Author: | 31-Mar-2023                                                                                                                                                                                                                                                                                                                                                                                                                                                                                                                                                                                                                                    |
| Complete List of Authors:     | Premji, Kamila; University of Western Ontario, Family Medicine; University of Ottawa, Family Medicine<br>Green, Michael; Queen's University; Institute for Clinical Evaluative Sciences<br>Glazier, Richard; Institute for Clinical Evaluative Sciences; St Michael's Hospital Li Ka Shing Knowledge Institute<br>Khan, Shahriar; Institute for Clinical Evaluative Sciences; Queen's University<br>Schultz, Susan; Institute for Clinical Evaluative Sciences<br>Mathews, Maria; University of Western Ontario<br>Nastos, Steve; Ontario Medical Association<br>Frymire, Eliot; Queen's University<br>Ryan, BL; University of Western Ontario |
| Keywords:                     | Primary Health Care, Health policy < HEALTH SERVICES ADMINISTRATION & MANAGEMENT, Health Services Accessibility, Human resource management < HEALTH SERVICES ADMINISTRATION & MANAGEMENT, Physicians                                                                                                                                                                                                                                                                                                                                                                                                                                           |
|                               |                                                                                                                                                                                                                                                                                                                                                                                                                                                                                                                                                                                                                                                |

SCHOLARONE™  
Manuscripts

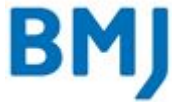

I, the Submitting Author has the right to grant and does grant on behalf of all authors of the Work (as defined in the below author licence), an exclusive licence and/or a non-exclusive licence for contributions from authors who are: i) UK Crown employees; ii) where BMJ has agreed a CC-BY licence shall apply, and/or iii) in accordance with the terms applicable for US Federal Government officers or employees acting as part of their official duties; on a worldwide, perpetual, irrevocable, royalty-free basis to BMJ Publishing Group Ltd ("BMJ") its licensees and where the relevant Journal is co-owned by BMJ to the co-owners of the Journal, to publish the Work in this journal and any other BMJ products and to exploit all rights, as set out in our [licence](#).

The Submitting Author accepts and understands that any supply made under these terms is made by BMJ to the Submitting Author unless you are acting as an employee on behalf of your employer or a postgraduate student of an affiliated institution which is paying any applicable article publishing charge ("APC") for Open Access articles. Where the Submitting Author wishes to make the Work available on an Open Access basis (and intends to pay the relevant APC), the terms of reuse of such Open Access shall be governed by a Creative Commons licence – details of these licences and which [Creative Commons](#) licence will apply to this Work are set out in our licence referred to above.

Other than as permitted in any relevant BMJ Author's Self Archiving Policies, I confirm this Work has not been accepted for publication elsewhere, is not being considered for publication elsewhere and does not duplicate material already published. I confirm all authors consent to publication of this Work and authorise the granting of this licence.

1  
2  
3 **TITLE: Trends in patient attachment to an aging primary care workforce: a population-**  
4 **based serial cross-sectional study in Ontario, Canada**  
5

6 Kamila Premji<sup>1,2,3</sup> MD, PhD(c) – corresponding author, [kpemji2@uottawa.ca](mailto:kpemji2@uottawa.ca), 500-267  
7 O'Connor Street, Ottawa, Ontario, K2P 1V3, 613-760-3707  
8

9 Michael E Green<sup>4,5,6</sup> MD, MPH  
10

11 Richard H Glazier<sup>5,7,8</sup> MD, MPH  
12

13 Shahriar Khan<sup>4,5</sup> PhD  
14

15 Susan E Schultz<sup>4</sup> MA, MSc  
16

17 Maria Mathews<sup>2,9</sup> PhD  
18

19 Steve Nastos<sup>10</sup> MA  
20

21 Eliot Frymire<sup>5</sup> MA  
22

23 Bridget L Ryan<sup>2,9</sup> PhD  
24  
25

26  
27 <sup>1</sup> Department of Family Medicine, Western University, London, Ontario

28 <sup>2</sup> Department of Family Medicine, University of Ottawa, Ottawa, Ontario

29 <sup>3</sup> Institut du Savoir Montfort, Ottawa, Ontario

30 <sup>4</sup> ICES  
31

32 <sup>5</sup> Health Services and Policy Research Institute, Queen's University, Kingston, Ontario  
33

34 <sup>6</sup> Department of Family Medicine, Queen's University, Kingston, Ontario  
35

36 <sup>7</sup> Li Ka Shing Knowledge Institute, St. Michael's Hospital, Toronto, Ontario  
37

38 <sup>8</sup> Department of Family and Community Medicine, Faculty of Medicine, University of  
39 Toronto, Toronto, Ontario  
40

41 <sup>9</sup> Department of Epidemiology and Biostatistics at Western University  
42

43 <sup>10</sup> Economics, Policy & Research, Ontario Medical Association, Toronto, Ontario  
44  
45  
46  
47  
48  
49  
50  
51  
52  
53  
54  
55  
56  
57  
58  
59  
60

## ABSTRACT

**Purpose:** Population aging is a global phenomenon. Resultant healthcare workforce shortages are anticipated. To ensure access to comprehensive primary care, which correlates with improved health outcomes, equity, and costs, data to inform workforce planning are urgently needed. We explored temporal trends in early career, mid-career, and near-retirement comprehensive primary care physician characteristics, the medical and social needs of their patients, and the workforce's capacity to absorb patients of near-retirement physicians.

**Methods:** We conducted a serial cross-sectional population-based analysis using health administrative data in Ontario, Canada, where most comprehensive primary care is delivered by family physicians (FPs) under universal insurance. We included all insured Ontario residents at three time points: 2008 (12,936,360), 2013 (13,447,365), and 2019 (14,388,566) and all Ontario physicians who billed primary care services (2008: 11,566; 2013: 12,693; 2019: 15,054). We examined the number and proportion of patients attached to near-retirement comprehensive FPs; the number and proportion of near-retirement comprehensive FPs; and the characteristics of patients and their comprehensive FPs.

**Results:** Patient attachment to comprehensive FPs increased over time. The overall FP workforce grew, but the proportion practicing comprehensiveness declined (2008: 77.2%, 2019: 70.7%), with shifts into limited scopes of practice across all career stages. Over time, an increasing proportion of the comprehensive FP workforce was near retirement age. Correspondingly, an increasing proportion of patients were attached to near-retirement physicians. By 2019, 13.9% of comprehensive FPs were 65 years or older, corresponding to 1,695,126 (14.8%) patients. Mean patient age increased, and near-retirement physicians served markedly increasing numbers of medically and socially complex patients.

1  
2  
3 **Conclusions:** The primary care sector faces capacity challenges as both patients and physicians  
4 age and fewer physicians practice comprehensiveness. Nearly 15% (1.7 million) of Ontarians  
5 may lose their comprehensive FP to retirement by 2025. To serve a growing, increasingly  
6 complex population, innovative solutions are needed.  
7  
8  
9  
10  
11  
12

### 13 **STRENGTHS AND LIMITATIONS OF THIS STUDY**

14  
15

- 16 • Our serial cross-sectional study uses large, population-level health administrative datasets  
17 to examine temporal trends in primary care supply and demand, in turn informing future  
18 workforce planning.  
19  
20
- 21 • By distinguishing between family physicians practicing comprehensive primary care and  
22 those who have narrowed their scope of practice, our methodology allows us to identify  
23 disparities between the presumed and actual primary care supply, and trends related to  
24 practice preferences among family physicians at all career stages.  
25  
26
- 27 • By linking the characteristics, including age and sex, of the primary care workforce to  
28 both the medical and social characteristics of the population served, our methodology  
29 facilitates a rich understanding of the resources needed by patients who may soon lose  
30 their FP to retirement, and the capacity to meet those needs among those who will remain  
31 in the workforce.  
32  
33
- 34 • Due to limitations in data availability for more recent years, our analyses predate the  
35 COVID-19 pandemic, which may have additional impacts on future supply and demand.  
36  
37
- 38 • Our analyses may underestimate the number of comprehensive FPs in rural areas due to  
39 practice patterns that may involve a large proportion of hospital-based services among  
40 some rural physicians.  
41  
42  
43  
44  
45  
46  
47  
48  
49  
50  
51  
52  
53  
54  
55  
56  
57  
58  
59  
60

## INTRODUCTION

Primary care is the foundation of high-performing health care systems worldwide,<sup>1</sup> and can be defined by four core functions (“the 4 Cs”) articulated by Starfield and others: first *Contact* access to the healthcare system, *Continuity* (long-term person-focused care), *Comprehensiveness* (meeting the majority of each patient’s physical and mental health care needs, including prevention, acute care, chronic care, and multimorbidity care), and *Coordination* of care across the healthcare system, including specialty care, hospitals, home care, and community services and support.<sup>1 2</sup> Access to primary care is associated with improved health outcomes, improved health equity, and reduced health system costs.<sup>3-9</sup>

An essential enabler of primary care access is an adequate health human resource (HHR) supply, but many jurisdictions are grappling with current and impending shortages. For example, 14.5% (4.6 million) Canadians are without a primary care provider.<sup>10</sup> Virtually every country worldwide is experiencing population aging,<sup>11</sup> with a high burden of medical complexity<sup>12-15</sup> and a HHR workforce that is aging into retirement.<sup>16-18</sup> Concurrently, many countries, including Canada, the United Kingdom, and the United States, are experiencing challenges attracting incoming physicians to primary care as a specialty,<sup>19-22</sup> and among those who do, a declining proportion are providing primary care reflective of Starfield’s “4 Cs” (hereafter referred to as “comprehensive primary care”); instead, primary care physicians are increasingly limiting their scope of work to subspecialized areas such as sports medicine, dermatology, or palliative care, or to episodic acute care settings, such as walk-in clinics.<sup>23-29</sup> Moreover, the concentration of women in primary care may further reduce HHR capacity, as women primary care physicians have been found to spend more time with patients<sup>30</sup> and receive more patient requests outside of appointments than men.<sup>31 32</sup>

1  
2  
3 In the context of an aging population and shifting workforce demographics, HHR planning  
4 requires an understanding of the needs of patients who will soon lose their primary care provider  
5 due to retirement, as well as an understanding of the capacity of the remaining and incoming  
6 workforce. To anticipate future workforce needs, previous studies often use high-level supply  
7 indicators such as number of primary care physicians, and high-level demand indicators such as  
8 patient visit rates and durations.<sup>33-36</sup> In-depth analyses tend to be limited to sub-jurisdictional  
9 populations, such as the neighborhood<sup>36</sup> or early career clinicians,<sup>24</sup> and do not directly link  
10 supply (individual clinicians) to demand (patients served by clinicians).  
11  
12  
13  
14  
15  
16  
17  
18  
19  
20  
21

22 We conducted an in-depth exploration linking supply and demand at a health system planning  
23 level in Ontario, Canada. We examined temporal trends in early career, mid-career, and near-  
24 retirement primary care physician characteristics, the medical and social needs of patients  
25 attached to these physicians, and the workforce's capacity to meet the needs of patients of near-  
26 retirement physicians. We explored hypothesis-generating differences in gender-based workforce  
27 trends, including differences in care provision,<sup>30 31</sup> and trends around alternative practice models,  
28 such as team-based care. As Canadian healthcare planning and delivery are provincial  
29 jurisdiction, we focused on the province-level (Ontario). In Ontario, most comprehensive  
30 primary care is delivered by family physicians (FPs), most physician services and nearly all  
31 residents are covered by government insurance, and health services data are stored centrally in  
32 health administrative datasets.  
33  
34  
35  
36  
37  
38  
39  
40  
41  
42  
43  
44  
45  
46  
47

## 48 **METHODS**

49

50  
51 The use of data in this study was authorized under section 45 of Ontario's Personal Health  
52 Information Protection Act (PHIPA) and did not require review by a research ethics board or  
53 informed consent. This study followed the Strengthening the Reporting of Observational Studies  
54  
55  
56  
57  
58  
59  
60



1  
2  
3 in Epidemiology (STROBE) reporting guideline.<sup>37</sup> Patients or the public were not involved in the  
4 design, or conduct, or reporting, or dissemination plans of our research.  
5  
6  
7

### 8 **Study Design, Population, and Data Sources**

9

10  
11 We conducted a serial cross-sectional population-level analysis using health administrative data  
12 housed at ICES. The study population included all registered Ontario residents covered by the  
13 Ontario Health Insurance Plan (OHIP) at three time points: March 31, 2008 (12,936,360), March  
14 31, 2013 (13,447,365), and March 31, 2019 (14,388,566) and all Ontario physicians who billed  
15 primary care services (2008: 11,566; 2013: 12,693; 2019: 15,054).  
16  
17  
18  
19  
20  
21  
22

23 Physician-level and patient-level data came from nine databases which were linked using unique  
24 encoded identifiers and analyzed at ICES (Supplement: eMethods).  
25  
26  
27

### 28 **Outcomes and Covariates**

29

30  
31 The primary outcomes were the number and proportion of patients attached to a near-retirement  
32 age comprehensive FP over three time points, and the number and proportion of near-retirement  
33 age comprehensive FPs over three time points. Based on previous literature finding the average  
34 Ontario FP retires at age 70.5 years (with women retiring on average 5 years earlier than men)<sup>38</sup>  
35 and accounting for the time needed to train new physicians,<sup>39</sup> three different “near-retirement”  
36 physician age cut-points were examined:  $\geq 55$  years,  $\geq 65$  years, and  $\geq 70$  years. Comprehensive  
37 FPs were defined by applying a previously validated algorithm described below in the Analysis  
38 section.<sup>29</sup>  
39  
40  
41  
42  
43  
44  
45  
46  
47  
48  
49  
50

51 We described the characteristics of both comprehensive FPs and their attached patients over the  
52 three time points. Physician characteristics served as exploratory indicators of both supply and,  
53 for near-retirement physicians, anticipated demand based on the populations of patients they  
54  
55  
56  
57  
58  
59  
60

1  
2  
3 serve. Patient characteristics served as indicators of demand based on medical and  
4  
5 sociodemographic complexity. Detailed data source, cohort, and covariate definitions can be  
6  
7 found in the Supplement (eMethods).  
8  
9

## 10 **Analysis**

11  
12  
13 For our patient cohort, we created cross-sections of patients attached to comprehensive FPs at  
14  
15 three time points: 2008, 2013, 2019.  
16  
17

18  
19 We began by applying our previously validated algorithm for primary care physician  
20  
21 attachment<sup>40</sup> to the population of OHIP-registered Ontario residents; identifying patients attached  
22  
23 to a physician providing longitudinal primary care services based on billing codes and physician-  
24  
25 level continuity of care (see Supplement eMethods – continuity of care). We removed patients  
26  
27 seen at Community Health Centres because they cannot be attached to a specific physician,  
28  
29 patients that the algorithm attached to non-FPs such as pediatricians and surgeons, and patients  
30  
31 attached to a FP with missing covariates.  
32  
33

34  
35 We next created the cohort of FPs linked to the attached patients we identified (2008, 2013,  
36  
37 2019). We stratified our patient and FP cohorts by physician practice type (scope). For this, we  
38  
39 used a previously published algorithm for determining comprehensiveness of primary care  
40  
41 practice, where physicians are identified as providing comprehensive care if more than half of  
42  
43 their services were for core primary care and if these services fell into at least 7 of 22 activity  
44  
45 areas.<sup>29</sup> This resulted in four groups of patients with attachments to four types of FP practice  
46  
47 scopes: Comprehensive, Focused (for example, sports medicine or palliative care), Other, and  
48  
49 those who worked less than 44 days/year. Focusing on the “comprehensive FP” group, we  
50  
51 described the characteristics of these physicians and their patients.  
52  
53  
54  
55  
56  
57  
58  
59  
60

Physician analyses were stratified by physician sex and physician age, including the three “near-retirement” cut-points. Proportions and means with standard deviations were reported for each time point (2008, 2013, 2019).

## RESULTS

### Patient Cohort

Excluding long-term care home residents, the population of OHIP-eligible Ontario residents in the patient cohort over time was 12,863,036 (2008), 13,371,946 (2013), and 14,312,309 (2019), of whom the following were attached to a comprehensive FP: 2008: n = 9,537,353 (77.3%); 2013: n = 10,398,003 (85.1%); 2019: n = 11,480,975 (86.1%) (Figure 1a).

### Physician Cohort

The overall FP workforce grew from 9,944 physicians in 2008 to 13,269 in 2019 (Figure 1b).

The proportion of FPs practicing comprehensive primary care declined from 77.2% in 2008 (n = 7,673) to 70.7% in 2019 (n = 9,377) (Supplement: eFigure 1).

eTable 1 stratifies comprehensive FP data by age and sex. The mean (SD) physician age remained relatively stable over time (2008: 50.3 (11.0) years; 2013: 51.4 (11.8) years; 2019: 49.7 (12.9) years). The mean age (SD) for female physicians was lower than for males at each time point (2008 male 53.0 (10.9) years, female 46.0 (9.7) years; 2013 male 54.7 (11.6) years, female 47.2 (10.6) years; 2019 male 53.1 (13.2) years, female 46.3 (11.6) years). Career stage (years in practice) closely followed physician age group for both males and females, and the youngest cohort (age <35) comprised an increasing proportion of the workforce over time, shifting from 7.7% in 2008 to 15.1% in 2019. The older cohorts were also found to comprise an increasing proportion of the workforce over time, and the absolute numbers of older physicians increased.

1  
2  
3 Among family physicians with patient attachments, a shift away from comprehensiveness and  
4 into other/focused scopes of practice was seen across all physician age groups, with the most  
5 pronounced shifts in the youngest and oldest physician groups (Supplement: eTable 2). Instead  
6 of comprehensive primary care, these FPs increasingly worked in focused or other scopes of  
7 practice. The proportion of FPs identified as practicing exclusively without patient attachments  
8 or in low-continuity (“walk-in clinic”) settings fluctuated: 2008: 7.2% (n = 715), 2013: 4.9% (n  
9 = 558); 2019: 5.2% (n = 688) (Figure 1b).

### 20 **Temporal Trends of Near-Retirement Comprehensive Family Physicians and their Patients**

21  
22  
23 When looking at our three near-retirement cut-points (55+, 65+, 70+) over time, an increasing  
24 proportion of the comprehensive FP workforce was near retirement age (Figure 2).

25  
26 Correspondingly, an increasing proportion of patients were attached to near-retirement  
27 comprehensive FPs (Table 1). In the 55+ age group, the proportion of comprehensive FPs  
28 increased from 35.7% in 2008 to 38.2% in 2019. In 2019, this corresponded to 3,586 physicians  
29 and 4,935,992 (43.0%) patients (2019). In the 65+ group, the proportion increased from 10.0% in  
30 2008 to 13.9% in 2019 (1,307 physicians, 1,695,126 (14.8%) patients). In the 70+ age group, the  
31 proportion increased from 4.6% in 2008 to 6.4% in 2019 (599 physicians, 666,000 (5.8%)  
32 patients).

**Table 1. Characteristics of patients attached to near-retirement comprehensive family physicians over time, by near-retirement group**

| Patient Characteristics                                                                                                            |      | Age 55+<br>Comprehensive FPs |      | Age 65+<br>Comprehensive FPs |      | Age 70+<br>Comprehensive FPs |      |
|------------------------------------------------------------------------------------------------------------------------------------|------|------------------------------|------|------------------------------|------|------------------------------|------|
|                                                                                                                                    |      | N                            | %    | N                            | %    | N                            | %    |
| <b>OVERALL<br/>(N, % of all patients attached to<br/>all comprehensive FPs)</b>                                                    | 2008 | 3,571,661                    | 37.5 | 690,642                      | 7.2  | 214,861                      | 2.3  |
|                                                                                                                                    | 2013 | 4,676,625                    | 45.0 | 1,399,119                    | 13.5 | 419,172                      | 4.0  |
|                                                                                                                                    | 2019 | 4,935,992                    | 43.0 | 1,695,126                    | 14.8 | 666,404                      | 5.8  |
| <b>Aged 65+<br/>(N, % of patients attached to<br/>near-retirement physician<br/>group)</b>                                         | 2008 | 597,707                      | 16.7 | 136,394                      | 19.8 | 45,414                       | 21.1 |
|                                                                                                                                    | 2013 | 846,974                      | 18.1 | 298,545                      | 21.3 | 95,833                       | 22.8 |
|                                                                                                                                    | 2019 | 1,003,769                    | 20.3 | 402,430                      | 23.7 | 176,473                      | 26.5 |
| <b>Female patients<br/>(N, % of patients attached to<br/>near-retirement physician<br/>group)</b>                                  | 2008 | 1,804,585                    | 50.5 | 338,656                      | 49.0 | 103,386                      | 48.1 |
|                                                                                                                                    | 2013 | 2,371,923                    | 50.7 | 678,971                      | 48.5 | 201,104                      | 48.0 |
|                                                                                                                                    | 2019 | 2,498,453                    | 50.6 | 823,090                      | 48.6 | 317,967                      | 47.7 |
| <b>Rural patients (RIO score 40+)<br/>(N, % of patients attached to<br/>near-retirement physician<br/>group)</b>                   | 2008 | 233,045                      | 6.5  | 48,860                       | 7.1  | 14,323                       | 6.7  |
|                                                                                                                                    | 2013 | 292,357                      | 6.3  | 88,311                       | 6.3  | 20,294                       | 4.8  |
|                                                                                                                                    | 2019 | 274,099                      | 5.6  | 83,691                       | 4.9  | 33,545                       | 5.0  |
| <b>Highest (4+) RUB<br/>(N, % of patients attached to<br/>near-retirement physician<br/>group)</b>                                 | 2008 | 677,436                      | 19.0 | 137,995                      | 20.0 | 44,067                       | 20.5 |
|                                                                                                                                    | 2013 | 878,340                      | 18.8 | 283,013                      | 20.2 | 88,182                       | 21.0 |
|                                                                                                                                    | 2019 | 983,818                      | 19.9 | 350,439                      | 20.7 | 146,298                      | 22.0 |
| <b>Highest (5+) annual core<br/>primary care visits<br/>(N, % of patients attached to<br/>near-retirement physician<br/>group)</b> | 2008 | 2,109,950                    | 59.1 | 403,026                      | 58.4 | 127,050                      | 59.1 |
|                                                                                                                                    | 2013 | 2,462,236                    | 52.7 | 753,388                      | 53.9 | 227,090                      | 54.2 |
|                                                                                                                                    | 2019 | 2,480,395                    | 50.3 | 876,487                      | 51.7 | 346,668                      | 52.0 |

|                                                                                                                                 |      |           |      |         |      |         |      |
|---------------------------------------------------------------------------------------------------------------------------------|------|-----------|------|---------|------|---------|------|
| <b>group)</b>                                                                                                                   |      |           |      |         |      |         |      |
| <b>COPD<br/>(N, % of patients attached to<br/>near-retirement physician<br/>group)</b>                                          | 2008 | 233,498   | 6.5  | 51,856  | 7.5  | 16,411  | 7.6  |
|                                                                                                                                 | 2013 | 326,748   | 7.0  | 115,669 | 8.3  | 37,477  | 8.9  |
|                                                                                                                                 | 2019 | 337,202   | 6.8  | 132,395 | 7.8  | 59,350  | 8.9  |
| <b>CHF<br/>(N, % of patients attached to<br/>near-retirement physician<br/>group)</b>                                           | 2008 | 69,573    | 2.0  | 15,645  | 2.3  | 4,952   | 2.3  |
|                                                                                                                                 | 2013 | 80,026    | 1.7  | 28,187  | 2.0  | 9,214   | 2.2  |
|                                                                                                                                 | 2019 | 90,436    | 1.8  | 35,567  | 2.1  | 15,832  | 2.4  |
| <b>Diabetes<br/>(N, % of patients attached to<br/>near-retirement physician<br/>group)</b>                                      | 2008 | 327,127   | 9.2  | 68,392  | 9.9  | 21,389  | 10.0 |
|                                                                                                                                 | 2013 | 506,014   | 10.8 | 170,115 | 12.2 | 52,815  | 12.5 |
|                                                                                                                                 | 2019 | 555,358   | 11.3 | 215,696 | 12.7 | 92,395  | 13.9 |
| <b>Frailty<br/>(N, % of patients attached to<br/>near-retirement physician<br/>group)</b>                                       | 2008 | 66,559    | 1.9  | 14,875  | 2.2  | 4,964   | 2.3  |
|                                                                                                                                 | 2013 | 98,490    | 2.1  | 33,005  | 2.4  | 10,794  | 2.6  |
|                                                                                                                                 | 2019 | 114,085   | 2.3  | 43,032  | 2.5  | 18,597  | 2.8  |
| <b>Any mental health illness in last<br/>2 years<br/>(N, % of patients attached to<br/>near-retirement physician<br/>group)</b> | 2008 | 825,520   | 23.1 | 166,257 | 24.1 | 51,802  | 24.1 |
|                                                                                                                                 | 2013 | 979,987   | 21.0 | 311,771 | 22.3 | 96,543  | 23.0 |
|                                                                                                                                 | 2019 | 1,022,523 | 20.7 | 355,911 | 21.0 | 150,153 | 22.5 |
| <b>Lowest income quintile<br/>(N, % of patients attached to<br/>near-retirement physician<br/>group)</b>                        | 2008 | 706,504   | 19.8 | 150,381 | 21.8 | 48,403  | 22.5 |
|                                                                                                                                 | 2013 | 876,982   | 18.8 | 282,922 | 20.2 | 91,236  | 21.8 |
|                                                                                                                                 | 2019 | 944,888   | 19.1 | 348,869 | 20.6 | 142,881 | 21.4 |
| <b>Highest housing instability<br/>quintile<br/>(N, % of patients attached to<br/>near-retirement physician<br/>group)</b>      | 2008 | 761,397   | 21.3 | 165,525 | 24.0 | 54,275  | 25.6 |
|                                                                                                                                 | 2013 | 934,472   | 20.0 | 295,059 | 21.1 | 92,653  | 22.2 |
|                                                                                                                                 | 2019 | 1,031,506 | 20.9 | 374,322 | 22.1 | 155,859 | 23.4 |

|                                                                                                                          |      |           |      |         |      |         |      |
|--------------------------------------------------------------------------------------------------------------------------|------|-----------|------|---------|------|---------|------|
| <b>Highest material deprivation quintile (N, % of patients attached to near-retirement physician group)</b>              | 2008 | 736,903   | 20.6 | 163,835 | 23.7 | 52,733  | 24.9 |
|                                                                                                                          | 2013 | 1,045,136 | 22.4 | 338,012 | 24.2 | 112,097 | 26.9 |
|                                                                                                                          | 2019 | 926,043   | 18.8 | 352,849 | 20.8 | 145,084 | 21.8 |
| <b>Highest neighborhood ethnic concentration quintile (N, % of patients attached to near-retirement physician group)</b> | 2008 | 962,252   | 26.9 | 177,586 | 25.7 | 63,167  | 29.8 |
|                                                                                                                          | 2013 | 1,335,124 | 28.6 | 397,430 | 28.4 | 124,062 | 29.8 |
|                                                                                                                          | 2019 | 1,521,975 | 30.8 | 584,512 | 34.5 | 213,182 | 32.0 |
| <b>Recent immigrant (N, % of patients attached to near-retirement physician group)</b>                                   | 2008 | 269,131   | 7.5  | 52,717  | 7.6  | 21,202  | 10.9 |
|                                                                                                                          | 2013 | 289,772   | 6.2  | 83,484  | 6.0  | 27,024  | 7.0  |
|                                                                                                                          | 2019 | 277,755   | 5.6  | 82,560  | 4.9  | 28,449  | 4.3  |

Interpretation of Table 1 rows:

Interpretation of the "Overall" category: For example, in 2019, 1,695,126 patients were attached to a comprehensive FP aged 65+. This represents 14.8% of all patients who are attached to a comprehensive FP.

Interpretation of each patient category: For example, in 2019, of the 666,404 patients attached to comprehensive FPs over the age of 70 years, 28,449 (4.3%) were recent immigrants

FPs: Family physicians

RIO: Rurality Index of Ontario

RUB: Morbidity, based on Resource Utilization Band

COPD: Chronic obstructive pulmonary disease

CHF: Congestive heart failure

## Temporal Characteristics of Comprehensive Family Physicians and their Patients

### *Comprehensive FP Capacity/Workload*

eTable 1 shows the mean (SD) roster size for the total population of comprehensive FPs remained consistent over time (2008: 1213 (927); 2013: 1272 (909); 2019: 1209 (837)). Male FPs had consistently larger roster sizes in each age group and at each time point. Both male and female FP roster sizes followed an inverted U pattern with FP age, with practice sizes starting and ending smaller at the extremes of FP age and peaking during mid-career. This pattern was observed at all three time points with older (65+) male and female physicians and younger (<35) male and female physicians caring for larger roster sizes over time.

Working full time equivalent (FTE) also followed an inverted U pattern according to FP age (eTable 1). Older physicians increasingly practiced FTE (2008: 58.4%, 2013: 67.0%, 2019: 72.6%). This was driven by an increasing proportion of female FTE comprehensive FPs. Among younger physicians, by 2019, females comprised the majority of FTE workforce (52.2% of FTE comprehensive FPs <35 years; 55.2% of FTE comprehensive FPs 35-44 years).

Mean (SD) annual core primary care visits provided per patient declined over time (eTable 1): 2008: 7.3 (3.1) visits; 2013: 6.5 (2.6) visits; 2019: 6.0 (2.3) visits. In most comprehensive FP age groups, male and females provided similar numbers of annual visits. Older physicians provided more annual visits compared with their younger counterparts.

In the patient cohort (Table 1), at all near-retirement physician cut-offs (55+, 65+, 70+), a declining proportion over time made a high number (5+) primary care visits in the preceding year, but these proportions remained consistently over 50% in all near-retirement groups and at each time point.



### ***Comprehensive FP Practice Settings***

A declining proportion of comprehensive FPs over time practiced in fee-for-service (FFS) models of care. Alternate payment plan models (APPs), specifically capitation/team-based models of care, were an increasingly common setting over time (Supplement: eFigure 2). In these APP models, physician compensation is primarily a lump sum payment per attached patient, with or without additional government funding for interdisciplinary health professional supports. In 2008, most comprehensive FPs worked in FFS-based models (76.6%), but by 2019, most practiced in APPs (55.4%). This shift was seen across all comprehensive FP age groups (Supplement: eTable 2). Correspondingly, an increasing proportion of patients were served in APP models: 2008: 26.5% (n = 2,526,116); 2013: 54.3% (n = 5,643,862); 2019: 61.5% (n = 7,064,109).

Over time, a stable majority of comprehensive FPs practiced in large urban and urban settings (Supplement: eTable 4A). After a decline in 2013, an increasing proportion and number practiced in rural/remote areas by 2019, but numbers did not return to 2008 levels (2008: 6.7%, n = 513; 2013: 5.1%, n = 410; 2019: 5.3%, 492). Trends around age and sex of rural comprehensive FPs resembled trends seen in the overall comprehensive FP population (Supplement: eTables 4B, 4C).

### ***Patient complexity***

The mean age (SD) of comprehensive FPs' patients increased over time (eTable 1): 2008: 33.5 (13.2) years; 2013: 36.5 (12.1) years; 2019: 38.1 (12.0) years. When stratified by physician age and sex, each physician age group served increasingly older patients. Male physicians cared for slightly older patients than did women in each physician age group and at each time point.

1  
2  
3 The number and proportion of patients aged 65 and older increased over time in each near-  
4 retirement group (Table 1). This number nearly quadrupled in the oldest (70+ years) FP group  
5  
6 (2008: N = 45,414, 2019: N = 176,473).  
7  
8  
9

10 Comprehensive FPs cared for a stable mean (SD) proportion of female patients over time (eTable  
11 1) (2008:53.2% (12.9); 2013: 53.1% (12.5); 2019: 52.9% (12.0). Female comprehensive FPs had  
12  
13 a greater proportion of female patients than male physicians at all time points and in all age  
14  
15 groups. The overall proportion of female patients was higher in younger physician age groups at  
16  
17 all time points, equalizing as physicians aged.  
18  
19  
20  
21  
22

23 When examining the patient cohort by near-retirement physician age groups, the proportion of  
24  
25 female patients also remained stable at each time point (Table 1), with slightly lower proportions  
26  
27 of female patients in the oldest near-retirement group.  
28  
29

30 Over time, an increasing proportion of comprehensive FPs' practices were comprised of the  
31  
32 highest morbidity patients (Resource Utilization Band (RUB) 4+): 2008: 16.5%; 2013: 18.1%;  
33  
34 2019: 19.8% (eTable 5). When stratified by comprehensive FP age and sex, older male  
35  
36 physicians cared for higher proportions of the highest morbidity patients than did older female  
37  
38 physicians in 2008 (65-69 years) and 2013 (65-69 years, 70+ years), but by 2019, males and  
39  
40 females cared for similar proportions of highest morbidity patients within each and across all  
41  
42 physician age groups.  
43  
44  
45  
46

47 Table 1 shows the number and proportion of highest morbidity patients attached to near-  
48  
49 retirement physicians grew over time. By 2019, 983,818 patients in the highest morbidity  
50  
51 patients were attached to a physician aged 55+, representing 19.9% of all patients attached to a  
52  
53 55+ physician. 350,439 were attached to a 65+ physician (20.7% of patients attached to a 65+  
54  
55  
56  
57  
58  
59  
60

1  
2  
3 physician). 146,298 were attached to a 70+ physician (22.0% of patients attached to 70+ a  
4  
5 physician), representing a tripling of the absolute number.  
6  
7

8 While proportions of patients with chronic illness (COPD, CHF, diabetes, frailty, mental illness)  
9  
10 remained relatively stable over time, the absolute numbers increased markedly in each near-  
11  
12 retirement group (Table 1).  
13  
14

15  
16 The proportions and means of socially complex patients cared for within each comprehensive FP  
17  
18 age and sex group increased over time for most indicators (eTable 5) and the number of higher  
19  
20 social complexity patients increased markedly over time for most near-retirement groups (Table  
21  
22 1).  
23  
24

## 25 26 **DISCUSSION**

27  
28 In our population-level serial cross-sectional analyses, the proportion of patients attached to a  
29  
30 comprehensive FP in Ontario, Canada, grew over time. However, we found an increasing  
31  
32 proportion of the comprehensive FP workforce is nearing retirement. Given the average FP  
33  
34 retires at age 70.5 years,<sup>38</sup> we anticipate that by 2025, nearly 1.7 million Ontarians may lose their  
35  
36 comprehensive FP to retirement, eroding gains made to date.  
37  
38

39  
40 This number may be an underestimate for several reasons. First, half of all comprehensive FPs  
41  
42 are now female, and female FPs retire on average 5 years earlier than males.<sup>38</sup> Second, a  
43  
44 decreasing proportion of FPs are practicing comprehensive family medicine. This trend was seen  
45  
46 across every physician age group, indicating practicing FPs are leaving comprehensive primary  
47  
48 care earlier in their careers than in previous years while a smaller proportion of incoming FPs are  
49  
50 choosing to enter comprehensive practice. Third, due to limitations in data availability for more  
51  
52 recent years, our analyses predate the COVID-19 pandemic, and surveys from Ontario indicate  
53  
54  
55  
56  
57  
58  
59  
60

1  
2  
3 the pandemic has hastened retirement plans, with almost double the usual proportion of FPs  
4 closing their offices during the pandemic (3%, compared with the usual rate of 1.6%/year),<sup>41</sup> and  
5  
6 one in five indicating an intention to retire within five years.<sup>42</sup>  
7  
8  
9

10 Several other trends identified likely apply to other jurisdictions nationally and internationally  
11 and, when taken together, indicated limited capacity in the workforce to absorb the workload of  
12 near-retirement physicians. Comprehensive FPs cared for increasingly older groups of patients  
13 with increasing complexity over time. As of 2019, all physician age groups served similar  
14 proportions of complex patients, and near-retirement physicians cared for an increasing number  
15 and proportion of older patients with increasing medical and social complexities. Females, who  
16 comprised an increasing proportion of the comprehensive FP workforce, served similar  
17 proportions of highest morbidity patients but smaller roster sizes compared with males, which  
18 may reflect previous research finding women primary care physicians spend more time with and  
19 receive more requests from patients.<sup>31 32</sup> That said, both the oldest and youngest male and female  
20 comprehensive FP groups served increasingly larger rosters, and an increasing proportion of  
21 older (65+) physicians practiced FTE.  
22  
23  
24  
25  
26  
27  
28  
29  
30  
31  
32  
33  
34  
35  
36  
37  
38

39 Ontario continues to add a net positive number of FPs to the workforce each year, but this  
40 number has declined from 453 in 2017 to 303 in 2020.<sup>43</sup> Over the past 7 years, a smaller  
41 proportion of medical school graduates ranked family medicine as their first choice discipline,<sup>44</sup>  
42  
43 echoing trends in other jurisdictions including the United Kingdom and the United States.<sup>20-22</sup>  
44  
45

46 The future supply of incoming FPs may therefore be inadequate to meet needs identified in our  
47 study, especially considering the 1.6 million Ontarians already without a regular primary care  
48 provider in our 2019 cohort.  
49  
50  
51  
52  
53  
54  
55  
56  
57  
58  
59  
60

1  
2  
3 Solutions to FP workforce shortages identified in the literature focus on addressing deterrents to  
4 the practice of comprehensive primary care, including perceived poor respect for primary care  
5 as a profession, inadequate compensation, inadequate training supports for developing and  
6 maintaining comprehensive skills, and inadequate administrative and interdisciplinary health  
7 supports to manage increasing patient complexity.<sup>21 24 45-49</sup> Our finding of a shift toward APP  
8 models underscores the desire among comprehensive FPs for financial stability and team-based  
9 supports. Further, we identified large numbers of patients with chronic diseases and complex  
10 social needs, all of which are highly amenable to team-based care.<sup>50-52</sup>

11  
12  
13  
14  
15  
16  
17  
18  
19  
20  
21  
22 There are some limitations to our study. The FTE indicator is based on physician billings and  
23 excluded non-billable administrative time. Almost half of Canadian FPs report 10-19 hours per  
24 week of administrative tasks,<sup>53</sup> so the indicator may underestimate workload, and thus the  
25 number of FTE FPs. Rural FPs often practice in both primary care and hospital settings;<sup>54</sup> since  
26 the comprehensiveness algorithm is based on primary care billings,<sup>29</sup> it may underestimate the  
27 number of rural comprehensive FPs. Further, the rurality index scores and methodology have not  
28 been updated since 2008. Some physician analyses could not be fully stratified by both age and  
29 sex due to small cell sizes. Community Health Centre patients are not included and we did not  
30 examine other clinicians who may provide primary care; however, these clinicians are the main  
31 primary care source for only a small minority (approximately 1%) of Ontarians.<sup>55 56</sup> Finally, our  
32 analyses do not account for the rise of virtual care and its potential impact on capacity.<sup>57-59</sup>

## 33 34 35 36 37 38 39 40 41 42 43 44 45 46 47 **CONCLUSIONS**

48  
49  
50 Primary care faces many capacity challenges as physicians age into retirement and fewer choose  
51 to enter or remain in comprehensive practice. Incentives and supports are needed to grow the  
52 comprehensive FP workforce to serve a growing and increasingly complex patient population.

## ACKNOWLEDGEMENTS

We would like to acknowledge Monish Kabir for her assistance in preparing the final submission.

**Conflict of Interest Disclosures:** None declared.

**Funding/Support:** This study was supported by the INSPIRE PHC (Innovations Strengthening Primary Health Care Through Research) Research Program, which is funded through the Health Systems Research Program of the Ontario Ministry of Health (MOH) and the Ontario Ministry of Long-term Care (MLTC). It was also supported by ICES, which is funded by an annual grant from the Ontario MOH and MLTC. Dr. Premji was also supported by the PhD Family Medicine program at the University of Western Ontario, and by the Junior Clinical Research Chair in Family Medicine at the Department of Family Medicine, University of Ottawa.

**Role of the Funder/Sponsor:** The funder had no role in the design and conduct of the study; collection, management, analysis, and interpretation of the data; preparation, review, or approval of the manuscript; and decision to submit the manuscript for publication.

**Disclaimer:** The analyses, conclusions, opinions, and statements expressed herein are solely those of the authors and do not reflect those of the funding or data sources; no endorsement is intended or should be inferred.

**Additional Information:** Parts of this material are based on data and/or information compiled and provided by CIHI and Cancer Care Ontario (CCO). The analyses, conclusions, opinions and statements expressed herein are solely those of the authors and do not reflect those of the data sources; no endorsement is intended or should be inferred.

## REFERENCES

1. Starfield B, Shi L, Macinko J. Contribution of primary care to health systems and health. *Milbank Q* 2005;83(3):457-502. doi: 10.1111/j.1468-0009.2005.00409.x
2. O'Malley AS, Rich EC, Maccarone A, et al. Disentangling the Linkage of Primary Care Features to Patient Outcomes: A Review of Current Literature, Data Sources, and Measurement Needs. *J Gen Intern Med* 2015;30(Suppl 3):S576-85. doi: 10.1007/s11606-015-3311-9
3. Basu S, Berkowitz SA, Phillips RL, et al. Association of Primary Care Physician Supply With Population Mortality in the United States, 2005-2015. *JAMA Intern Med* 2019;179(4):506-14. doi: 10.1001/jamainternmed.2018.7624 [published Online First: 2019/02/19]
4. Bazemore A, Petterson S, Peterson LE, et al. Higher Primary Care Physician Continuity is Associated With Lower Costs and Hospitalizations. *Ann Fam Med* 2018;16(6):492-97. doi: 10.1370/afm.2308 [published Online First: 2018/11/14]
5. McAlister FA, Bakal JA, Green L, et al. The effect of provider affiliation with a primary care network on emergency department visits and hospital admissions. *CMAJ* 2018;190(10):E276-E84. doi: 10.1503/cmaj.170385 [published Online First: 2018/03/14]
6. Pereira Gray DJ, Sidaway-Lee K, White E, et al. Continuity of care with doctors-a matter of life and death? A systematic review of continuity of care and mortality. *BMJ Open* 2018;8(6):e021161. doi: 10.1136/bmjopen-2017-021161 [published Online First: 2018/07/01]
7. OECD. OECD Health Policy Studies: Realising the Potential of Primary Health Care: OECD Publishing, 2020.
8. National Health Service (NHS) England. Primary Care England, UK: NHS; 2017 [updated 2019; cited 2023 March 3]. Available from: <https://www.england.nhs.uk/five-year-forward-view/next-steps-on-the-nhs-five-year-forward-view/primary-care/> accessed March 3 2023.
9. Vallejo-Torres L, Morris S. Primary care supply and quality of care in England. *Eur J Health Econ* 2018;19(4):499-519. doi: 10.1007/s10198-017-0898-2 [published Online First: 2017/06/01]
10. Statistics Canada. Primary Health Care Providers, 2019 2020 [cited 2023 March 3]. Available from: <https://www150.statcan.gc.ca/n1/pub/82-625-x/2020001/article/00004-eng.pdf> accessed March 3 2023.
11. United Nations Department of Economic and Social Affairs Population Division. World Population Ageing 2019: Highlights New York, United States: United Nations; 2019 [cited 2023 March 9]. Available from: <https://www.un.org/development/desa/pd/sites/www.un.org.development.desa.pd/files/files/documents/2020/Jan/worldpopulationageing2019-highlights.pdf> accessed March 9 2023.
12. Kudesia P, Salimarouny B, Stanley M, et al. The incidence of multimorbidity and patterns in accumulation of chronic conditions: A systematic review. *J Multimorb Comorb* 2021;11:26335565211032880. doi: 10.1177/26335565211032880 [published Online First: 2021/08/06]



13. Ryan BL, Allen B, Zwarenstein M, et al. Multimorbidity and mortality in Ontario, Canada: A population-based retrospective cohort study. *J Comorb* 2020;10:2235042X20950598. doi: 10.1177/2235042X20950598 [published Online First: 2020/09/15]
14. Rosella L, Kornas K, Huang A, et al. Accumulation Of Chronic Conditions At The Time Of Death Increased In Ontario From 1994 To 2013. *Health Aff* 2018;37(3):464-72. doi: 10.1377/hlthaff.2017.1150 [published Online First: 2018/03/06]
15. Koné Pefoyo AJ, Bronskill SE, Gruneir A, et al. The increasing burden and complexity of multimorbidity. *BMC Public Health* 2015;15:415. doi: 10.1186/s12889-015-1733-2 [published Online First: 2015/04/24]
16. Statistics Canada. In the Midst of High Job Vacancies and Historically Low Unemployment, Canada Faces Record Retirements from an Aging Labour Force 2022 [cited 2023 March 9]. Available from: <https://www150.statcan.gc.ca/n1/daily-quotidien/220427/dq220427a-eng.pdf> accessed March 9 2023.
17. Cristea M, Noja GG, Stefea P, et al. The Impact of Population Aging and Public Health Support on EU Labor Markets. *Int J Environ Res Public Health* 2020;17(4) doi: 10.3390/ijerph17041439 [published Online First: 2020/02/28]
18. Willis J, Antono B, Bazemore A, et al. The State of Primary Care in the United States: A Chartbook of Facts and Statistics, 2020.
19. Canadian Resident Matching Service (CaRMS). CaRMS R-1 Data and Reports. R-1 Match Reports 2022 [cited 2022 August 24]. Available from: <https://www.carms.ca/data-reports/r1-data-reports/> accessed August 24 2022.
20. The American Academy of Family Physicians. 2022 Match Results for Family Medicine 2022 [cited 2022 August 24]. Available from: [https://www.aafp.org/content/dam/AAFP/documents/medical\\_education\\_residency/the\\_match/AAFP-2022-Match-Results-for-Family-Medicine.pdf](https://www.aafp.org/content/dam/AAFP/documents/medical_education_residency/the_match/AAFP-2022-Match-Results-for-Family-Medicine.pdf) accessed August 24 2022.
21. Alberti H, Banner K, Collingwood H, et al. ‘Just a GP’: a mixed method study of undermining of general practice as a career choice in the UK. *BMJ Open* 2017;7(11):e018520. doi: 10.1136/bmjopen-2017-018520
22. Lambert TW, Smith F, Goldacre MJ. Trends in attractiveness of general practice as a career: surveys of views of UK-trained doctors. *Br J Gen Pract* 2017;67(657):e238-e47. doi: 10.3399/bjgp17X689893 [published Online First: 2017/03/16]
23. Freeman TR, Boisvert L, Wong E, et al. Comprehensive practice: Normative definition across 3 generations of alumni from a single family practice program, 1985 to 2012. *Can Fam Physician* 2018;64(10):750-59. [published Online First: 2018/10/14]
24. Kabir M, Randall E, Mitra G, et al. Resident and early-career family physicians' focused practice choices in Canada: a qualitative study. *Br J Gen Pract* 2022;72(718):e334-e41. doi: 10.3399/BJGP.2021.0512 [published Online First: 2022/01/14]
25. Lavergne MR, Scott I. The “kids” are alright: Practice patterns among early career family physicians and implications for primary care policy and workforce planning. Department of Family Medicine Rounds. University of British Columbia, BC, Canada, 2022.
26. Reitz R, Horst K, Davenport M, et al. Factors Influencing Family Physician Scope of Practice: A Grounded Theory Study. *Fam Med* 2018;50(4):269-74. doi: 10.22454/FamMed.2018.602663 [published Online First: 2018/04/19]
27. Chan BTB. The declining comprehensiveness of primary care. *CMAJ* 2002;166(4):429-34.



- 1
  - 2
  - 3
  - 4
  - 5
  - 6
  - 7
  - 8
  - 9
  - 10
  - 11
  - 12
  - 13
  - 14
  - 15
  - 16
  - 17
  - 18
  - 19
  - 20
  - 21
  - 22
  - 23
  - 24
  - 25
  - 26
  - 27
  - 28
  - 29
  - 30
  - 31
  - 32
  - 33
  - 34
  - 35
  - 36
  - 37
  - 38
  - 39
  - 40
  - 41
  - 42
  - 43
  - 44
  - 45
  - 46
  - 47
  - 48
  - 49
  - 50
  - 51
  - 52
  - 53
  - 54
  - 55
  - 56
  - 57
  - 58
  - 59
  - 60
28. Coutinho AJ, Cochrane A, Stelter K, et al. Comparison of intended scope of practice for family medicine residents with reported scope of practice among practicing family physicians. *JAMA* 2015;314(22):2364. doi: 10.1001/jama.2015.13734
29. Schultz SE, Glazier RH. Identification of physicians providing comprehensive primary care in Ontario: a retrospective analysis using linked administrative data. *CMAJ Open* 2017;5(4):E856–E63. doi: 10.9778/cmajo.20170083
30. Ganguli I, Sheridan B, Gray J, et al. Physician Work Hours and the Gender Pay Gap - Evidence from Primary Care. *N Engl J Med* 2020;383(14):1349-57. doi: 10.1056/NEJMsa2013804 [published Online First: 2020/10/01]
31. Rittenberg E, Liebman JB, Rexrode KM. Primary Care Physician Gender and Electronic Health Record Workload. *J Gen Intern Med* 2022;37(13):3295-301. doi: 10.1007/s11606-021-07298-z [published Online First: 2022/01/08]
32. Pelley E, Carnes M. When a Specialty Becomes “Women’s Work”: Trends in and Implications of Specialty Gender Segregation in Medicine. *Academic Medicine* 2020;95(10):1499-506. doi: 10.1097/acm.0000000000003555
33. Glied S, Ma S. How Will the Affordable Care Act Affect the Use of Health Care Services? Issue Briefs: The Commonwealth Fund, 2015:1-15.
34. Petterson SM, Liaw WR, Phillips RL, Jr., et al. Projecting US primary care physician workforce needs: 2010-2025. *Ann Fam Med* 2012;10(6):503-9. doi: 10.1370/afm.1431 [published Online First: 2012/11/15]
35. Rao A, Shi Z, Ray KN, et al. National Trends in Primary Care Visit Use and Practice Capabilities, 2008-2015. *Ann Fam Med* 2019;17(6):538-44. doi: 10.1370/afm.2474 [published Online First: 2019/11/13]
36. Bourgeault IL, Chamberland-Rowe C, Simkin S. Co-developing an integrated primary care workforce planning approach at a regional level: overarching framework and guiding principles. *Hum Resour Health* 2021;19(1):87. doi: 10.1186/s12960-021-00578-z
37. von Elm E, Altman DG, Egger M, et al. The Strengthening the Reporting of Observational Studies in Epidemiology (STROBE) Statement: guidelines for reporting observational studies. *Int J Surg* 2014;12(12):1495-99. doi: 10.1016/j.ijssu.2014.07.013
38. Simkin S, Dahrouge S, Bourgeault IL. End-of-career practice patterns of primary care physicians in Ontario. *Can Fam Physician* 2019;65(5):e221-e30. [published Online First: 2019/05/16]
39. Working Group on Postgraduate Curriculum Review TCoFPoCC. Length of Training in the Core Family Medicine Residency. Mississauga, ON, Canada, 2012.
40. Jaakkimainen L, Bayoumi I, Glazier RH, et al. Development and validation of an algorithm using health administrative data to define patient attachment to primary care providers. *J Health Organ Manag* 2021;ahead-of-print(ahead-of-print):733-43. doi: 10.1108/JHOM-05-2020-0171 [published Online First: 2021/07/26]
41. Kiran T, Green ME, Wu CF, et al. Family Physicians Stopping Practice During the COVID-19 Pandemic in Ontario, Canada. *Ann Fam Med* 2022;20(5):460-63. doi: 10.1370/afm.2865 [published Online First: 2022/10/14]
42. Kiran T, Wang R, Handford C, et al. Keeping doors open: A cross-sectional survey of family physician practice patterns during COVID-19, needs, and intentions. *medRxiv* 2021:2021.12.20.21267918. doi: 10.1101/2021.12.20.21267918
43. Ontario Physician Reporting Centre. Physicians in Ontario 2022 [cited 2022 August 31]. Available from: <https://physicianreporting.org/pio/> accessed August 31 2022.

- 1
- 2
- 3
- 4 44. Canadian Resident Matching Service (CaRMS). R-1 data and reports: Discipline choice of
- 5 Canadian applicants 2022 [cited 2022 September 1]. Available from:
- 6 <https://www.carms.ca/data-reports/r1-data-reports/> accessed September 1 2022.
- 7
- 8 45. Kost A, Bentley A, Phillips J, et al. Graduating Medical Student Perspectives on Factors
- 9 Influencing Specialty Choice: An AAFP National Survey. *Fam Med* 2019;51(2):129-36.
- 10 doi: 10.22454/FamMed.2019.136973 [published Online First: 2019/02/12]
- 11
- 12 46. Mahood SC. Medical education: Beware the hidden curriculum. *Can Fam Physician*
- 13 2011;57(9):983-5. [published Online First: 2011/09/16]
- 14
- 15 47. Porter J, Boyd C, Skandari MR, et al. Revisiting the Time Needed to Provide Adult Primary
- 16 Care. *J Gen Intern Med* 2023;38(1):147-55. doi: 10.1007/s11606-022-07707-x [published
- 17 Online First: 2022/07/02]
- 18
- 19 48. Preparing Our Future Family Physicians: An educational prescription for strengthening
- 20 health care in changing times. In: Fowler N, Oandasan I, Wyman R, eds. Mississauga,
- 21 ON, Canada: The College of Family Physicians of Canada (CFPC), 2022.
- 22
- 23 49. Bazemore A, Grunert T. Sailing the 7C's: Starfield Revisited as a Foundation of Family
- 24 Medicine Residency Redesign.
- 25
- 26 50. Kiran T, Kopp A, Moineddin R, et al. Longitudinal evaluation of physician payment reform
- 27 and team-based care for chronic disease management and prevention. *CMAJ*
- 28 2015;187(17):E494-E502. doi: 10.1503/cmaj.150579 [published Online First:
- 29 2015/09/24]
- 30
- 31 51. Chen PG, Mehrotra A, Auerbach DI. Do we really need more physicians? Responses to
- 32 predicted primary care physician shortages. *Med Care* 2014;52(2):95-6. doi:
- 33 10.1097/mlr.0000000000000046 [published Online First: 2013/12/07]
- 34
- 35 52. McMurphy D, Astles R. Final Report: An External Evaluation of the Family Health Team
- 36 (FHT) Initiative Ottawa, ON, Canada: The Conference Board of Canada; 2014 [cited
- 37 2023 March 9]. Available from: <https://www.researchgate.net/publication/273866011>
- 38 accessed March 9 2023.
- 39
- 40 53. Canadian Medical Association (CMA). CMA 2021 National Physician Health Survey 2022
- 41 [cited 2023 March 9]. Available from: [https://www.cma.ca/sites/default/files/2022-](https://www.cma.ca/sites/default/files/2022-08/NPHS_final_report_EN.pdf)
- 42 [08/NPHS\\_final\\_report\\_EN.pdf](https://www.cma.ca/sites/default/files/2022-08/NPHS_final_report_EN.pdf) accessed March 9 2023.
- 43
- 44 54. Chan B, Schultz S. Supply and Utilization of General Practitioner and Family Physician
- 45 Services in Ontario: ICES, 2005.
- 46
- 47 55. Stukel TA, Glazier RH, Schultz SE, et al. Multispecialty physician networks in Ontario.
- 48 *Open Med* 2013;7(2):e40-55. [published Online First: 2013/12/19]
- 49
- 50 56. Nurse Practitioner Association of Ontario. Nurse Practitioners' Association of Ontario and
- 51 Nurse Practitioner-led Clinic Association supports "Vision for Tomorrow" report 2022
- 52 [cited 2022 September 12]. Available from: [https://npao.org/nurse-practitioners-](https://npao.org/nurse-practitioners-association-of-ontario-and-nurse-practitioner-led-clinic-association-supports-vision-for-tomorrow-report/)
- 53 [association-of-ontario-and-nurse-practitioner-led-clinic-association-supports-vision-for-](https://npao.org/nurse-practitioners-association-of-ontario-and-nurse-practitioner-led-clinic-association-supports-vision-for-tomorrow-report/)
- 54 [tomorrow-report/](https://npao.org/nurse-practitioners-association-of-ontario-and-nurse-practitioner-led-clinic-association-supports-vision-for-tomorrow-report/) accessed September 12 2022.
- 55
- 56 57. Bavafa H, Hitt LM, Terwiesch C. The Impact of E-Visits on Visit Frequencies and Patient
- 57 Health: Evidence from Primary Care. *Manage Sci* 2018;64(12):5461-80. doi:
- 58 10.1287/mnsc.2017.2900 [published Online First: 2018/12/01]
- 59
- 60 58. Ashwood JS, Mehrotra A, Cowling D, et al. Direct-To-Consumer Telehealth May Increase
- Access To Care But Does Not Decrease Spending. *Health Aff* 2017;36(3):485-91. doi:
- 10.1377/hlthaff.2016.1130 [published Online First: 2017/03/08]

1  
2  
3  
4  
5  
6  
7  
8  
9  
10  
11  
12  
13  
14  
15  
16  
17  
18  
19  
20  
21  
22  
23  
24  
25  
26  
27  
28  
29  
30  
31  
32  
33  
34  
35  
36  
37  
38  
39  
40  
41  
42  
43  
44  
45  
46  
47  
48  
49  
50  
51  
52  
53  
54  
55  
56  
57  
58  
59  
60

59. Asch DA. The hidden economics of telemedicine. *Ann Intern Med* 2015;163(10):801-2. doi: 10.7326/M15-1416 [published Online First: 2015/09/08]

For peer review only

1  
2  
3  
4  
5  
6  
7  
8  
9  
10  
11  
12  
13  
14  
15  
16  
17  
18  
19  
20  
21  
22  
23  
24  
25  
26  
27  
28  
29  
30  
31  
32  
33  
34  
35  
36  
37  
38  
39  
40  
41  
42  
43  
44  
45  
46  
47  
48  
49  
50  
51  
52  
53  
54  
55  
56  
57  
58  
59  
60

Figure 1a. Cohort creation: Patients

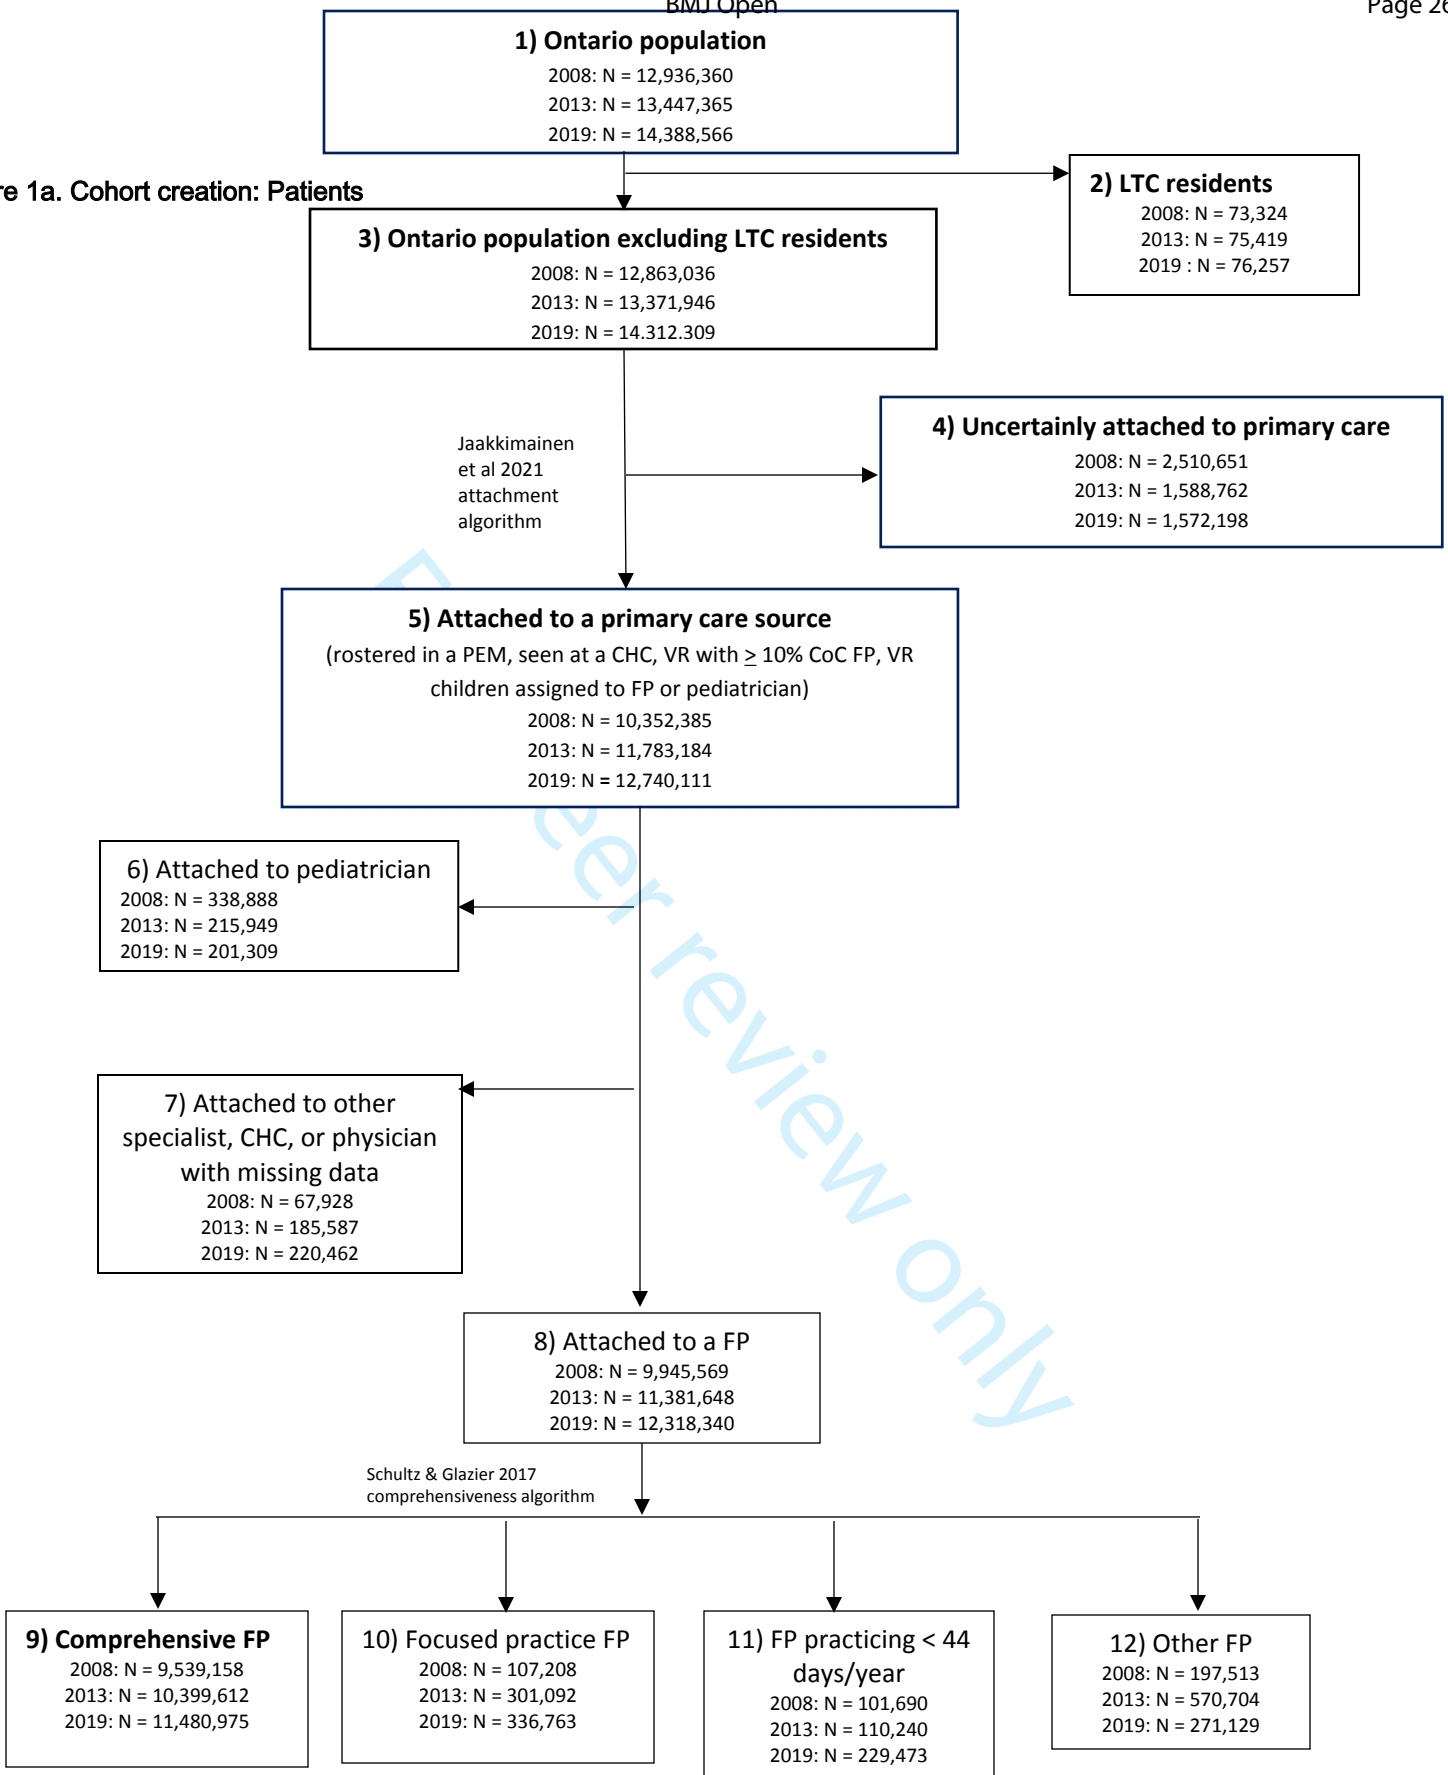

LTC: Long-term care home  
 FP: Family physician  
 CHC: Community Health Centre  
 VR: Virtually Rostered. Patient is considered VR to the physician with whom the majority of their primary care core visits were made over the preceding two-year period (Jaakkimainen et al 2021)  
 CoC: Physician-level Continuity of Care. Numerator = the number of patients virtually rostered to a physician. Denominator = all unique patients the same physician had seen over two years. Physician CoC ≤ 10% corresponds to low CoC. (Jaakkimainen et al 2021)  
 Comprehensive FP: Comprehensive scope of primary care practice. At least 50% of prior year's billings are for core primary care services in at least 7 different primary care activity areas (Schultz & Glazier 2017)  
 Focused FP: Narrowed scope of practice, such as sports medicine or geriatrics  
 Other: Not comprehensive and not focused practice  
 <44 days: Worked less than 44 days/year

1  
2  
3  
4  
5  
6  
7  
8  
9  
10  
11  
12  
13  
14  
15  
16  
17  
18  
19  
20  
21  
22  
23  
24  
25  
26  
27  
28  
29  
30  
31  
32  
33  
34  
35  
36  
37  
38  
39  
40  
41  
42  
43  
44  
45  
46  
47  
48  
49  
50  
51  
52  
53  
54  
55  
56  
57  
58  
59  
60

For peer review only

1  
2  
3 **Figure 1b. Cohort creation: Physicians**

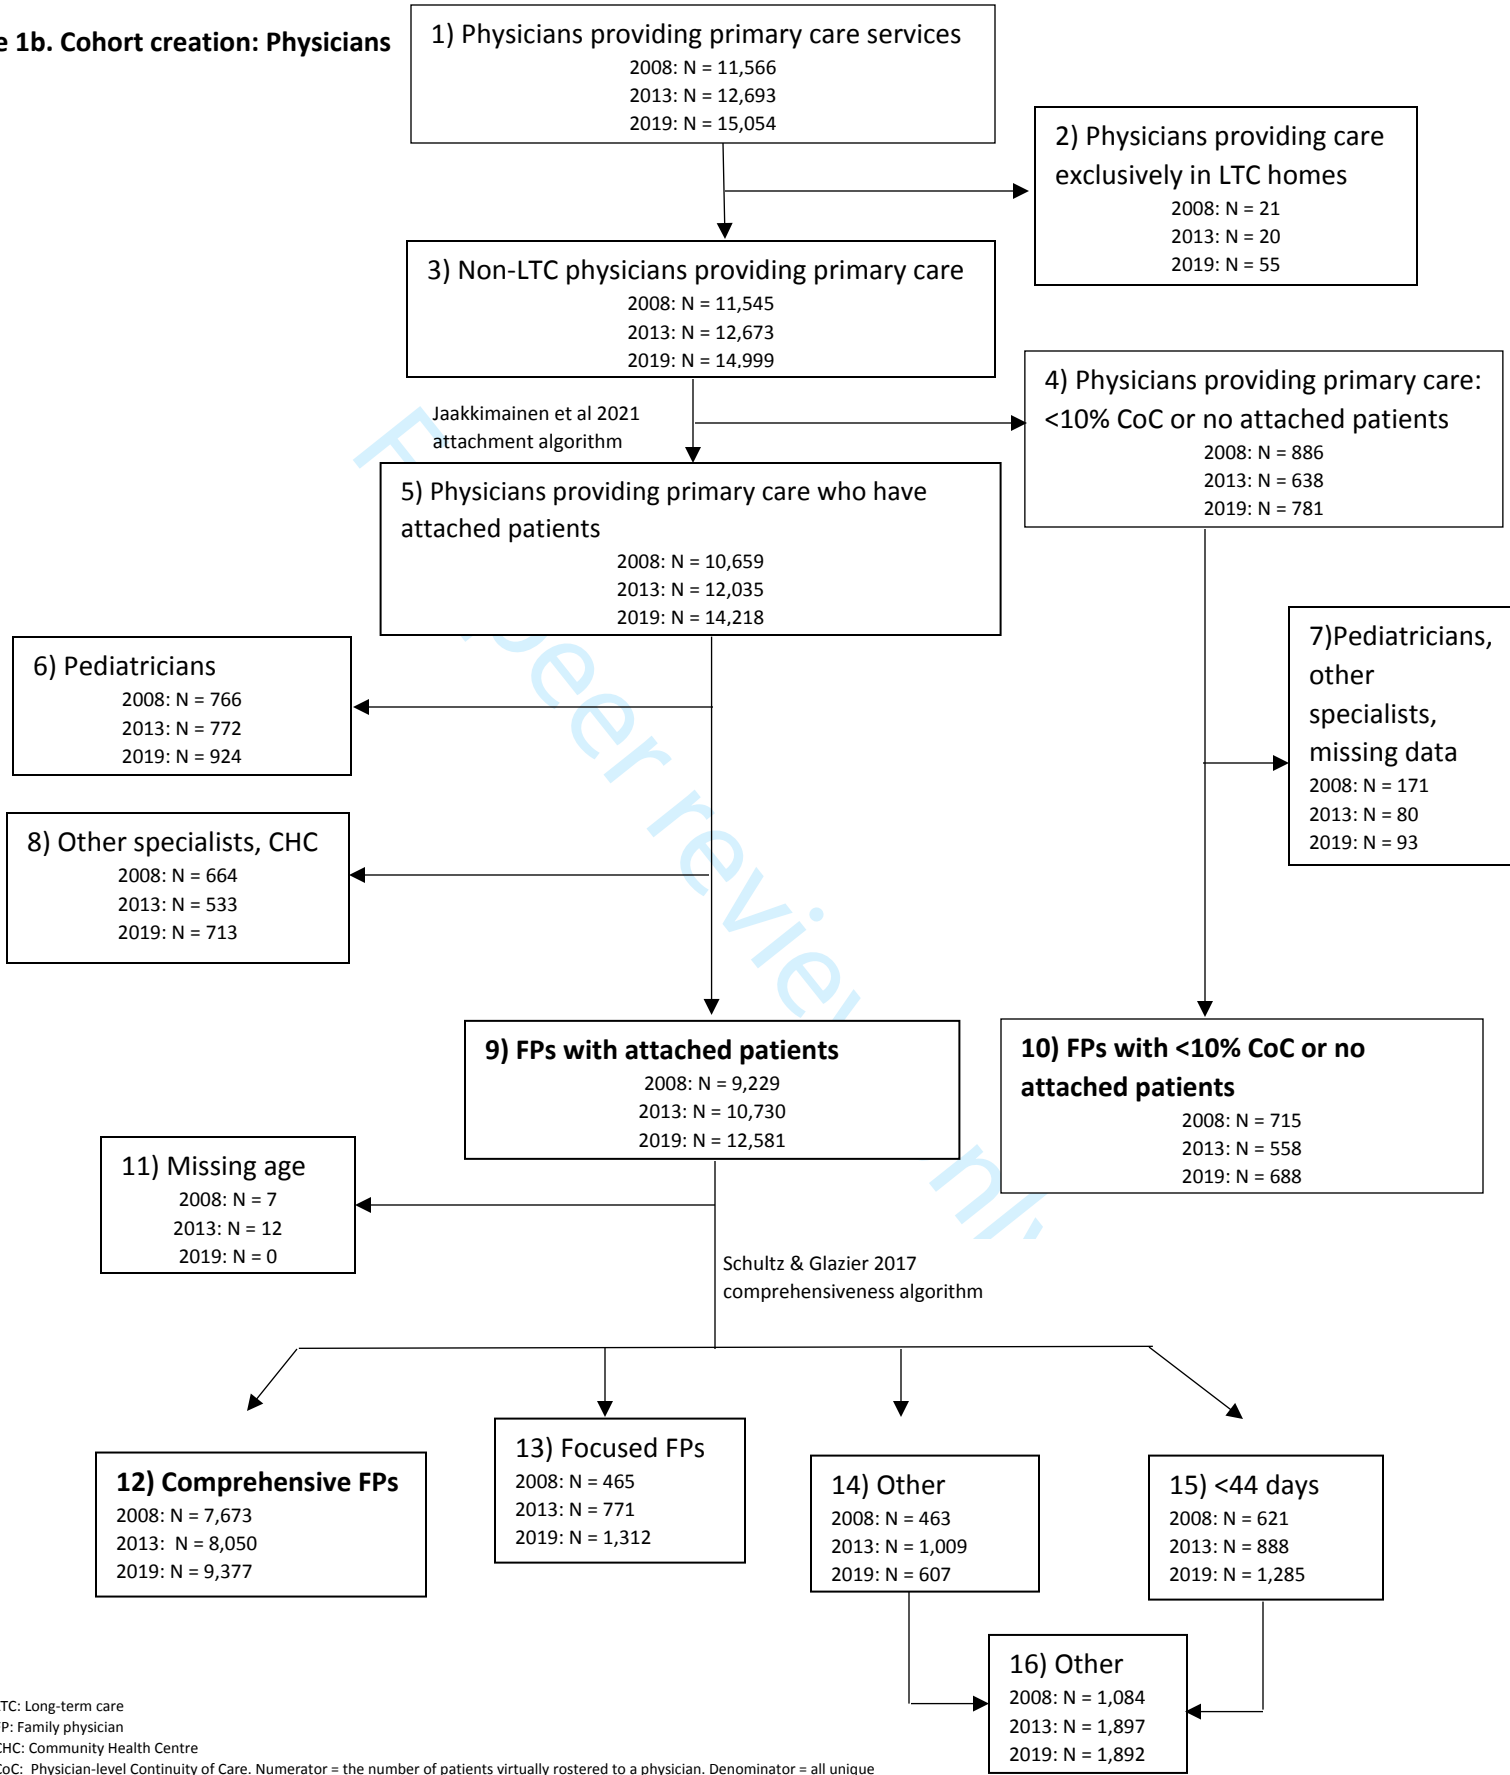

LTC: Long-term care  
 FP: Family physician  
 CHC: Community Health Centre  
 CoC: Physician-level Continuity of Care. Numerator = the number of patients virtually rostered to a physician. Denominator = all unique patients the same physician had seen over two years. Physician CoC ≤ 10% corresponds to low CoC. (Jaakkimainen et al 2021)  
 Comprehensive FP: Comprehensive scope of primary care practice. At least 50% of prior year's billings are for core primary care services in at least 7 different primary care activity areas (Schultz & Glazier 2017)  
 Focused FP: Narrowed scope of practice, such as sports medicine, palliative care, hospitalist.  
 Other: Not comprehensive and not focused practice  
 <44 days: Worked less than 44 days/year

1  
2  
3  
4  
5  
6  
7  
8  
9  
10  
11  
12  
13  
14  
15  
16  
17  
18  
19  
20  
21  
22  
23  
24  
25  
26  
27  
28  
29  
30  
31  
32  
33  
34  
35  
36  
37  
38  
39  
40  
41  
42  
43  
44  
45  
46  
47

**Figure 2. Comprehensive family physicians by near-retirement group, year, and sex**

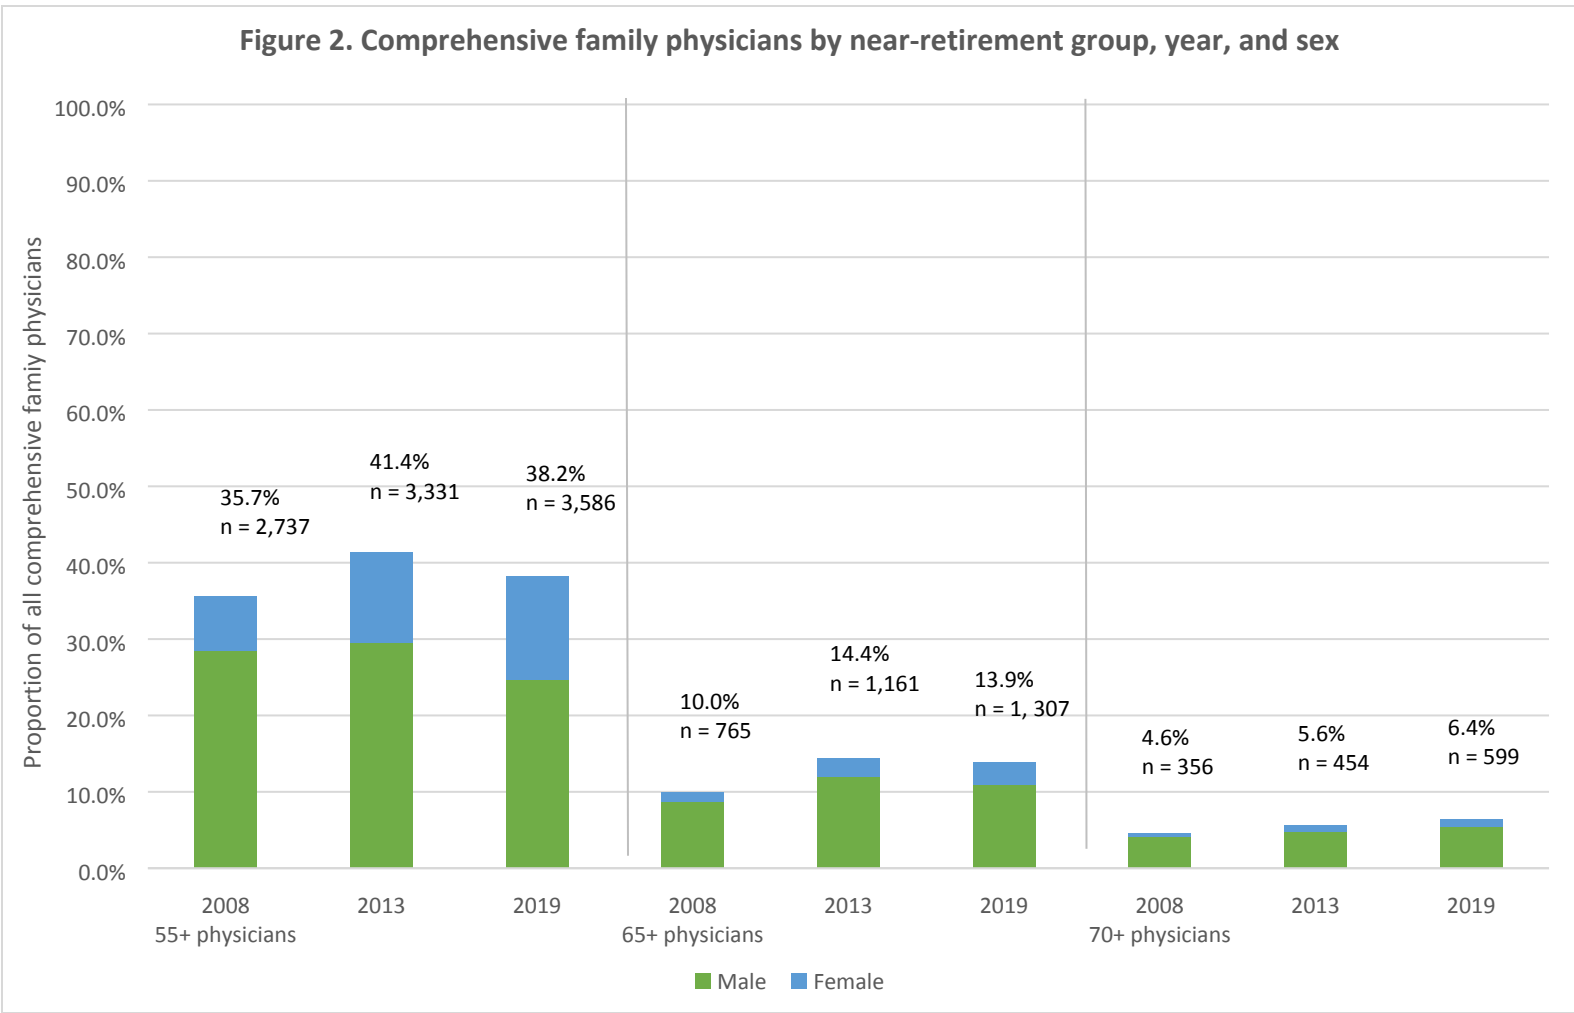

Total Ns (all comprehensive family physicians):  
 2008: 7,673  
 2013: 8,050  
 2019: 9,377

**Table 1. Characteristics of patients attached to near-retirement comprehensive family physicians over time, by near-retirement group**

|                                                                                                                        |      | Age 55+<br>Comprehensive FPs |      | Age 65+<br>Comprehensive FPs |      | Age 70+<br>Comprehensive FPs |      |
|------------------------------------------------------------------------------------------------------------------------|------|------------------------------|------|------------------------------|------|------------------------------|------|
|                                                                                                                        |      | N                            | %    | N                            | %    | N                            | %    |
| <b>Patient Characteristics</b>                                                                                         |      |                              |      |                              |      |                              |      |
| <b>OVERALL<br/>(N, % of all patients attached to all comprehensive FPs)</b>                                            | 2008 | 3,571,661                    | 37.5 | 690,642                      | 7.2  | 214,861                      | 2.3  |
|                                                                                                                        | 2013 | 4,676,625                    | 45.0 | 1,399,119                    | 13.5 | 419,172                      | 4.0  |
|                                                                                                                        | 2019 | 4,935,992                    | 43.0 | 1,695,126                    | 14.8 | 666,404                      | 5.8  |
| <b>Aged 65+<br/>(N, % of patients attached to near-retirement physician group)</b>                                     | 2008 | 597,707                      | 16.7 | 136,394                      | 19.8 | 45,414                       | 21.1 |
|                                                                                                                        | 2013 | 846,974                      | 18.1 | 298,545                      | 21.3 | 95,833                       | 22.8 |
|                                                                                                                        | 2019 | 1,003,769                    | 20.3 | 402,430                      | 23.7 | 176,473                      | 26.5 |
| <b>Female patients<br/>(N, % of patients attached to near-retirement physician group)</b>                              | 2008 | 1,804,585                    | 50.5 | 338,656                      | 49.0 | 103,386                      | 48.1 |
|                                                                                                                        | 2013 | 2,371,923                    | 50.7 | 678,971                      | 48.5 | 201,104                      | 48.0 |
|                                                                                                                        | 2019 | 2,498,453                    | 50.6 | 823,090                      | 48.6 | 317,967                      | 47.7 |
| <b>Rural patients (RIO score 40+)<br/>(N, % of patients attached to near-retirement physician group)</b>               | 2008 | 233,045                      | 6.5  | 48,860                       | 7.1  | 14,323                       | 6.7  |
|                                                                                                                        | 2013 | 292,357                      | 6.3  | 88,311                       | 6.3  | 20,294                       | 4.8  |
|                                                                                                                        | 2019 | 274,099                      | 5.6  | 83,691                       | 4.9  | 33,545                       | 5.0  |
| <b>Highest (4+) RUB<br/>(N, % of patients attached to near-retirement physician group)</b>                             | 2008 | 677,436                      | 19.0 | 137,995                      | 20.0 | 44,067                       | 20.5 |
|                                                                                                                        | 2013 | 878,340                      | 18.8 | 283,013                      | 20.2 | 88,182                       | 21.0 |
|                                                                                                                        | 2019 | 983,818                      | 19.9 | 350,439                      | 20.7 | 146,298                      | 22.0 |
| <b>Highest (5+) annual core primary care visits<br/>(N, % of patients attached to near-retirement physician group)</b> | 2008 | 2,109,950                    | 59.1 | 403,026                      | 58.4 | 127,050                      | 59.1 |
|                                                                                                                        | 2013 | 2,462,236                    | 52.7 | 753,388                      | 53.9 | 227,090                      | 54.2 |
|                                                                                                                        | 2019 | 2,480,395                    | 50.3 | 876,487                      | 51.7 | 346,668                      | 52.0 |



|    |                                                                                                                                 |      |           |      |         |      |         |      |
|----|---------------------------------------------------------------------------------------------------------------------------------|------|-----------|------|---------|------|---------|------|
| 1  |                                                                                                                                 |      |           |      |         |      |         |      |
| 2  | <b>COPD<br/>(N, % of patients attached to<br/>near-retirement physician<br/>group)</b>                                          | 2008 | 233,498   | 6.5  | 51,856  | 7.5  | 16,411  | 7.6  |
| 3  |                                                                                                                                 | 2013 | 326,748   | 7.0  | 115,669 | 8.3  | 37,477  | 8.9  |
| 4  |                                                                                                                                 | 2019 | 337,202   | 6.8  | 132,395 | 7.8  | 59,350  | 8.9  |
| 5  |                                                                                                                                 |      |           |      |         |      |         |      |
| 6  |                                                                                                                                 |      |           |      |         |      |         |      |
| 7  | <b>CHF<br/>(N, % of patients attached to<br/>near-retirement physician<br/>group)</b>                                           | 2008 | 69,573    | 2.0  | 15,645  | 2.3  | 4,952   | 2.3  |
| 8  |                                                                                                                                 | 2013 | 80,026    | 1.7  | 28,187  | 2.0  | 9,214   | 2.2  |
| 9  |                                                                                                                                 | 2019 | 90,436    | 1.8  | 35,567  | 2.1  | 15,832  | 2.4  |
| 10 |                                                                                                                                 |      |           |      |         |      |         |      |
| 11 |                                                                                                                                 |      |           |      |         |      |         |      |
| 12 |                                                                                                                                 |      |           |      |         |      |         |      |
| 13 | <b>Diabetes<br/>(N, % of patients attached to<br/>near-retirement physician<br/>group)</b>                                      | 2008 | 327,127   | 9.2  | 68,392  | 9.9  | 21,389  | 10.0 |
| 14 |                                                                                                                                 | 2013 | 506,014   | 10.8 | 170,115 | 12.2 | 52,815  | 12.5 |
| 15 |                                                                                                                                 | 2019 | 555,358   | 11.3 | 215,696 | 12.7 | 92,395  | 13.9 |
| 16 |                                                                                                                                 |      |           |      |         |      |         |      |
| 17 |                                                                                                                                 |      |           |      |         |      |         |      |
| 18 | <b>Frailty<br/>(N, % of patients attached to<br/>near-retirement physician<br/>group)</b>                                       | 2008 | 66,559    | 1.9  | 14,875  | 2.2  | 4,964   | 2.3  |
| 19 |                                                                                                                                 | 2013 | 98,490    | 2.1  | 33,005  | 2.4  | 10,794  | 2.6  |
| 20 |                                                                                                                                 | 2019 | 114,085   | 2.3  | 43,032  | 2.5  | 18,597  | 2.8  |
| 21 |                                                                                                                                 |      |           |      |         |      |         |      |
| 22 |                                                                                                                                 |      |           |      |         |      |         |      |
| 23 |                                                                                                                                 |      |           |      |         |      |         |      |
| 24 | <b>Any mental health illness in<br/>last 2 years<br/>(N, % of patients attached to<br/>near-retirement physician<br/>group)</b> | 2008 | 825,520   | 23.1 | 166,257 | 24.1 | 51,802  | 24.1 |
| 25 |                                                                                                                                 | 2013 | 979,987   | 21.0 | 311,771 | 22.3 | 96,543  | 23.0 |
| 26 |                                                                                                                                 | 2019 | 1,022,523 | 20.7 | 355,911 | 21.0 | 150,153 | 22.5 |
| 27 |                                                                                                                                 |      |           |      |         |      |         |      |
| 28 |                                                                                                                                 |      |           |      |         |      |         |      |
| 29 |                                                                                                                                 |      |           |      |         |      |         |      |
| 30 |                                                                                                                                 |      |           |      |         |      |         |      |
| 31 | <b>Lowest income quintile<br/>(N, % of patients attached to<br/>near-retirement physician<br/>group)</b>                        | 2008 | 706,504   | 19.8 | 150,381 | 21.8 | 48,403  | 22.5 |
| 32 |                                                                                                                                 | 2013 | 876,982   | 18.8 | 282,922 | 20.2 | 91,236  | 21.8 |
| 33 |                                                                                                                                 | 2019 | 944,888   | 19.1 | 348,869 | 20.6 | 142,881 | 21.4 |
| 34 |                                                                                                                                 |      |           |      |         |      |         |      |
| 35 |                                                                                                                                 |      |           |      |         |      |         |      |
| 36 | <b>Highest housing instability<br/>quintile<br/>(N, % of patients attached to<br/>near-retirement physician<br/>group)</b>      | 2008 | 761,397   | 21.3 | 165,525 | 24.0 | 54,275  | 25.6 |
| 37 |                                                                                                                                 | 2013 | 934,472   | 20.0 | 295,059 | 21.1 | 92,653  | 22.2 |
| 38 |                                                                                                                                 | 2019 | 1,031,506 | 20.9 | 374,322 | 22.1 | 155,859 | 23.4 |
| 39 |                                                                                                                                 |      |           |      |         |      |         |      |
| 40 |                                                                                                                                 |      |           |      |         |      |         |      |
| 41 |                                                                                                                                 |      |           |      |         |      |         |      |
| 42 |                                                                                                                                 |      |           |      |         |      |         |      |
| 43 | <b>Highest material deprivation</b>                                                                                             | 2008 | 736,903   | 20.6 | 163,835 | 23.7 | 52,733  | 24.9 |
| 44 |                                                                                                                                 |      |           |      |         |      |         |      |
| 45 |                                                                                                                                 |      |           |      |         |      |         |      |
| 46 |                                                                                                                                 |      |           |      |         |      |         |      |
| 47 |                                                                                                                                 |      |           |      |         |      |         |      |

|                                                                                                                                          |      |           |      |         |      |         |      |
|------------------------------------------------------------------------------------------------------------------------------------------|------|-----------|------|---------|------|---------|------|
| <b>quintile<br/>(N, % of patients attached to<br/>near-retirement physician<br/>group)</b>                                               | 2013 | 1,045,136 | 22.4 | 338,012 | 24.2 | 112,097 | 26.9 |
|                                                                                                                                          | 2019 | 926,043   | 18.8 | 352,849 | 20.8 | 145,084 | 21.8 |
| <b>Highest neighborhood ethnic<br/>concentration quintile<br/>(N, % of patients attached to<br/>near-retirement physician<br/>group)</b> | 2008 | 962,252   | 26.9 | 177,586 | 25.7 | 63,167  | 29.8 |
|                                                                                                                                          | 2013 | 1,335,124 | 28.6 | 397,430 | 28.4 | 124,062 | 29.8 |
|                                                                                                                                          | 2019 | 1,521,975 | 30.8 | 584,512 | 34.5 | 213,182 | 32.0 |
| <b>Recent immigrant<br/>(N, % of patients attached to<br/>near-retirement physician<br/>group)</b>                                       | 2008 | 269,131   | 7.5  | 52,717  | 7.6  | 21,202  | 10.9 |
|                                                                                                                                          | 2013 | 289,772   | 6.2  | 83,484  | 6.0  | 27,024  | 7.0  |
|                                                                                                                                          | 2019 | 277,755   | 5.6  | 82,560  | 4.9  | 28,449  | 4.3  |

Interpretation of Table 2 rows:

Interpretation of the "Overall" category: For example, in 2019, 1,695,126 patients were attached to a comprehensive FP aged 65+. This represents 14.8% of all patients who are attached to a comprehensive FP.

Interpretation of each patient category: For example, in 2019, of the 666,404 patients attached to comprehensive FPs over the age of 70 years, 28,449 (4.3%) were recent immigrants

FPs: Family physicians

RIO: Rurality Index of Ontario

RUB: Morbidity, based on Resource Utilization Band

COPD: Chronic obstructive pulmonary disease

CHF: Congestive heart failure

eFigure 1. Proportion of family physicians practicing comprehensiveness by year, age, and sex

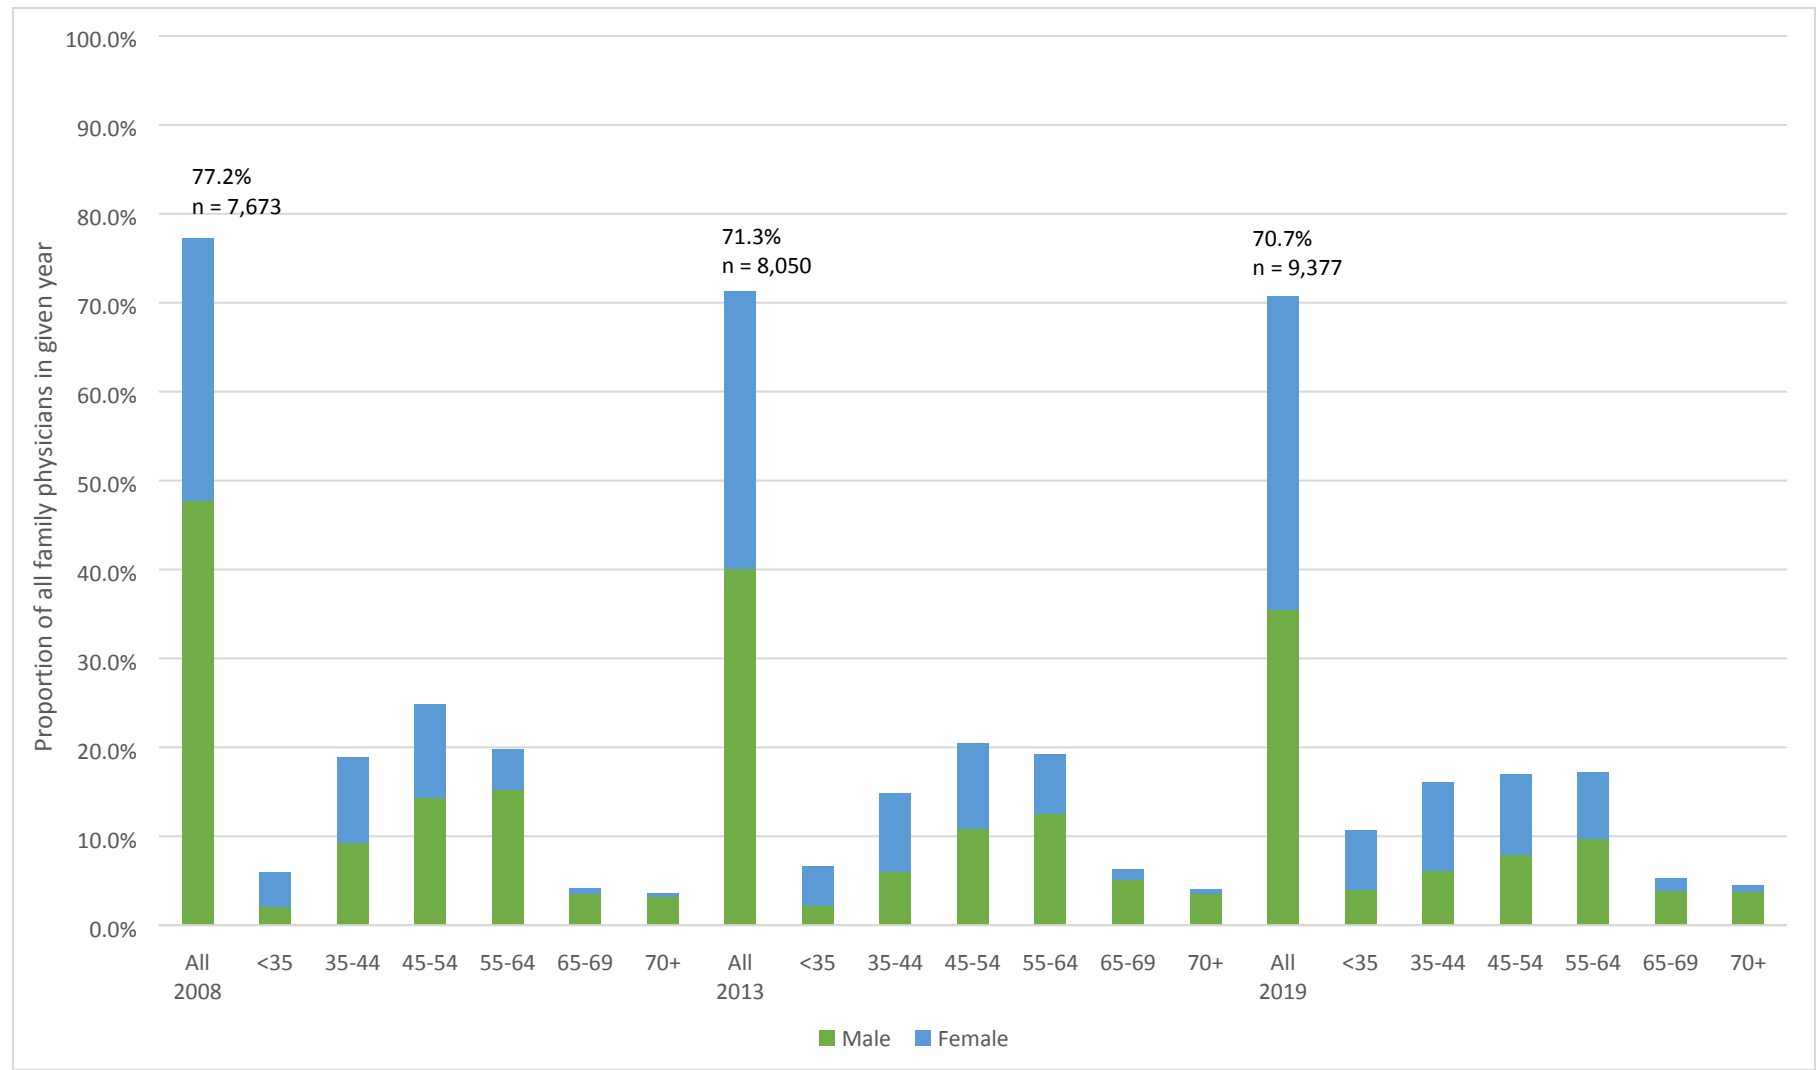

Total Ns (all family physicians): 2008: 9,944; 2013: 11,288; 2019: 13,269

**eFigure 2. Proportion of comprehensive family physicians in various practice models by year**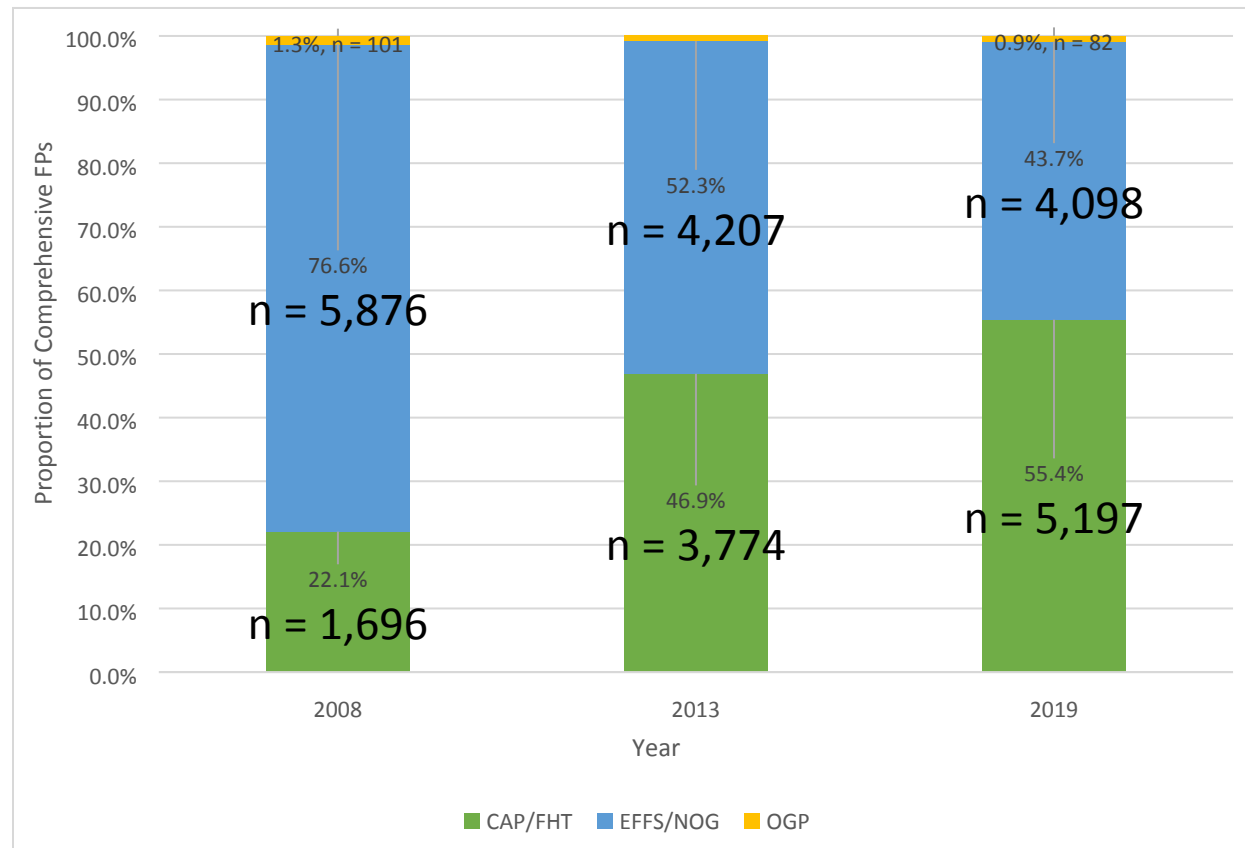

Total Ns (all comprehensive family physicians): 2008: 7,673; 2013: 8,050; 2019: 9,377

CAP/FHT: Alternate payment plan (APP) model where physician payments are mainly capitation (CAP)-based (annual amount per enrolled patient, adjusted for patient age and sex), with or without additional funding for interdisciplinary team members (Family Health Team (FHT)) such as nurse practitioners and social workers

EFFS/NOG: Fee-for-service payment models. EFFS = fee-for-service payments with enrolment requirements and some pay enhancements, such as higher payments for enrolled patients and bonus payments for meeting preventive care targets. NOG = No group; traditional fee-for-service payments with no enrolment requirements or payment enhancements.

eTable 1. Practice characteristics of comprehensive family physicians

|                             |      | <35 Years         |                   |                   | 35-44 Years        |                    |                    | 45-54 Years        |                     |                    | 55-64 Years        |                    |                    | 65-69 Years        |                    |                    | 70+ Years          |                    |                   | Total Comprehensive FPs |                    |                    |
|-----------------------------|------|-------------------|-------------------|-------------------|--------------------|--------------------|--------------------|--------------------|---------------------|--------------------|--------------------|--------------------|--------------------|--------------------|--------------------|--------------------|--------------------|--------------------|-------------------|-------------------------|--------------------|--------------------|
|                             |      | Total             | M                 | F                 | Total              | M                  | F                  | Total              | M                   | F                  | Total              | M                  | F                  | Total              | M                  | F                  | Total              | M                  | F                 | Total                   | M                  | F                  |
| Comp. FPs N (%)             | 2008 | 592<br>(7.7)      | 211<br>(35.6)     | 381<br>(64.4)     | 1877<br>(24.5)     | 922<br>(49.1)      | 955<br>(50.9)      | 2467<br>(32.2)     | 1422<br>(57.6)      | 1045<br>(42.4)     | 1972<br>(25.7)     | 1522<br>(77.2)     | 450<br>(22.8)      | 409<br>(5.3)       | 347<br>(84.8)      | 62<br>(15.2)       | 356<br>(4.6)       | 319<br>(89.6)      | 37<br>(10.4)      | 7673<br>(100.0)         | 4743<br>(61.8)     | 2930<br>(38.2)     |
|                             | 2013 | 741<br>(9.2)      | 245<br>(33.1)     | 496<br>(66.9)     | 1666<br>(20.7)     | 674<br>(40.5)      | 992<br>(59.5)      | 2312<br>(28.7)     | 1227<br>(53.1)      | 1085<br>(46.9)     | 2170<br>(27.0)     | 1415<br>(65.2)     | 755<br>(34.8)      | 707<br>(8.8)       | 576<br>(81.5)      | 131<br>(18.5)      | 454<br>(5.6)       | 392<br>(86.3)      | 62<br>(13.7)      | 8050<br>(100.0)         | 4529<br>(56.3)     | 3521<br>(43.7)     |
|                             | 2019 | 1414<br>(15.1)    | 528<br>(37.3)     | 886<br>(62.7)     | 2135<br>(22.8)     | 806<br>(37.8)      | 1329<br>(62.2)     | 2242<br>(23.9)     | 1048<br>(46.7)      | 1194<br>(53.3)     | 2279<br>(24.3)     | 1290<br>(56.6)     | 989<br>(43.4)      | 708<br>(7.6)       | 519<br>(73.3)      | 189<br>(26.7)      | 599<br>(6.4)       | 505<br>(84.3)      | 94<br>(15.7)      | 9377<br>(100.0)         | 4696<br>(50.1)     | 4681<br>(49.9)     |
| Years in pract. (mean (SD)) | 2008 | 6.0<br>(±2.3)     | 6.3<br>(±2.3)     | 5.9<br>(±2.2)     | 14.4<br>(±3.9)     | 14.7<br>(±3.8)     | 14.1<br>(±3.9)     | 23.7<br>(±4.2)     | 23.8<br>(±4.2)      | 23.5<br>(±4.2)     | 33.4<br>(±4.4)     | 33.6<br>(±4.2)     | 32.8<br>(±4.8)     | 41.3<br>(±3.0)     | 41.2<br>(±3.0)     | 42.0<br>(±3.2)     | 48.0<br>(±5.1)     | 48.0<br>(±4.9)     | 47.8<br>(±6.4)    | 24.6<br>(±11.4)         | 27.3<br>(±11.2)    | 20.2<br>(±10.1)    |
|                             | 2013 | 5.7<br>(±2.1)     | 5.4<br>(±2.1)     | 5.9<br>(±2.1)     | 13.8<br>(±4.2)     | 14.0<br>(±4.2)     | 13.7<br>(±4.1)     | 23.9<br>(±4.2)     | 23.9<br>(±4.0)      | 23.8<br>(±4.4)     | 33.2<br>(±4.4)     | 33.6<br>(±4.4)     | 32.5<br>(±4.5)     | 41.2<br>(±3.5)     | 41.1<br>(±3.4)     | 41.6<br>(±4.0)     | 48.7<br>(±4.9)     | 48.7<br>(±4.9)     | 49.0<br>(±4.9)    | 25.6<br>(±12.3)         | 28.8<br>(±12.1)    | 21.4<br>(±11.1)    |
|                             | 2019 | 5.8<br>(±2.0)     | 5.7<br>(±2.0)     | 5.8<br>(±1.9)     | 12.5<br>(±4.2)     | 12.5<br>(±4.4)     | 12.5<br>(±4.0)     | 23.7<br>(±4.7)     | 23.9<br>(±4.7)      | 23.5<br>(±4.6)     | 33.3<br>(±4.7)     | 33.4<br>(±4.5)     | 33.2<br>(±4.9)     | 40.8<br>(±3.6)     | 41.0<br>(±3.4)     | 40.3<br>(±4.0)     | 48.5<br>(±5.1)     | 48.4<br>(±5.3)     | 48.7<br>(±4.1)    | 23.7<br>(±13.4)         | 27.0<br>(±13.8)    | 20.3<br>(±12.0)    |
| Roster size (mean (SD))     | 2008 | 638.3<br>(±622.5) | 790.7<br>(±722.0) | 553.9<br>(±542.7) | 1131.8<br>(±873.2) | 1323.5<br>(±981.3) | 946.7<br>(±707.0)  | 1345.1<br>(±920.7) | 1470.3<br>(±996.7)  | 1174.6<br>(±774.4) | 1432.1<br>(±945.2) | 1494.0<br>(±961.5) | 1222.7<br>(±856.4) | 1123.1<br>(±955.5) | 1186.1<br>(±981.7) | 770.7<br>(±701.1)  | 566.3<br>(±770.9)  | 584.9<br>(±785.4)  | 406.5<br>(±618.7) | 1212.8<br>(±927.0)      | 1338.8<br>(±991.1) | 1008.8<br>(±770.0) |
|                             | 2013 | 620.0<br>(±605.9) | 725.2<br>(±690.9) | 568.0<br>(±552.6) | 1152.8<br>(±836.0) | 1348.6<br>(±935.1) | 1019.7<br>(±732.6) | 1407.1<br>(±927.1) | 1567.8<br>(±1013.4) | 1225.4<br>(±780.2) | 1490.2<br>(±894.6) | 1593.1<br>(±937.6) | 1297.2<br>(±772.4) | 1366.1<br>(±905.8) | 1420.3<br>(±921.3) | 1128.0<br>(±794.3) | 898.1<br>(±895.7)  | 946.7<br>(±922.9)  | 591.1<br>(±622.7) | 1272.1<br>(±909.2)      | 1425.0<br>(±975.2) | 1075.4<br>(±773.4) |
|                             | 2019 | 734.0<br>(±644.2) | 834.7<br>(±712.0) | 674.0<br>(±592.4) | 1074.5<br>(±720.3) | 1217.2<br>(±841.6) | 987.9<br>(±620.1)  | 1394.8<br>(±876.2) | 1529.3<br>(±946.5)  | 1276.7<br>(±791.2) | 1405.6<br>(±847.2) | 1531.6<br>(±902.2) | 1241.1<br>(±738.3) | 1434.4<br>(±900.5) | 1502.5<br>(±932.8) | 1247.6<br>(±777.3) | 1098.0<br>(±804.3) | 1125.7<br>(±815.1) | 949.2<br>(±729.6) | 1208.9<br>(±837.4)      | 1351.9<br>(±908.8) | 1065.4<br>(±731.6) |
| Core PC visits (mean (SD))  | 2008 | 6.2<br>(±2.7)     | 6.2<br>(±2.8)     | 6.2<br>(±2.7)     | 7.3<br>(±4.2)      | 7.5<br>(±5.6)      | 7.2<br>(±2.3)      | 7.3<br>(±2.3)      | 7.4<br>(±2.5)       | 7.3<br>(±2.1)      | 7.7<br>(±2.6)      | 7.7<br>(±2.6)      | 7.7<br>(±2.4)      | 7.5<br>(±3.1)      | 7.6<br>(±3.2)      | 6.9<br>(±2.7)      | 6.8<br>(±3.5)      | 6.9<br>(±3.5)      | 6.2<br>(±2.9)     | 7.3<br>(±3.1)           | 7.4<br>(±3.5)      | 7.1<br>(±2.4)      |
|                             | 2013 | 5.3<br>(±2.3)     | 5.4<br>(±2.3)     | 5.3<br>(±2.3)     | 6.3<br>(±2.1)      | 6.2<br>(±2.2)      | 6.3<br>(±2.0)      | 6.5<br>(±2.4)      | 6.6<br>(±2.7)       | 6.4<br>(±2.0)      | 6.7<br>(±2.8)      | 6.8<br>(±3.2)      | 6.4<br>(±1.9)      | 6.9<br>(±2.4)      | 6.9<br>(±2.4)      | 7.0<br>(±2.3)      | 7.3<br>(±4.0)      | 7.5<br>(±4.2)      | 6.5<br>(±2.4)     | 6.5<br>(±2.6)           | 6.6<br>(±2.9)      | 6.3<br>(±2.1)      |
|                             | 2019 | 5.6<br>(±2.5)     | 5.5<br>(±2.6)     | 5.6<br>(±2.4)     | 6.0<br>(±2.5)      | 5.9<br>(±2.8)      | 6.0<br>(±2.4)      | 6.1<br>(±2.1)      | 6.1<br>(±2.3)       | 6.1<br>(±1.9)      | 6.1<br>(±2.1)      | 6.2<br>(±2.3)      | 6.0<br>(±1.8)      | 6.4<br>(±2.2)      | 6.5<br>(±2.3)      | 6.2<br>(±2.0)      | 6.7<br>(±3.0)      | 6.5<br>(±2.9)      | 7.2<br>(±3.1)     | 6.0<br>(±2.3)           | 6.1<br>(±2.5)      | 6.0<br>(±2.2)      |
| Pt age (mean (SD))          | 2008 | 27.9<br>(±13.8)   | 29.4<br>(±14.0)   | 27.1<br>(±13.6)   | 31.7<br>(±11.7)    | 32.8<br>(±12.6)    | 30.5<br>(±10.7)    | 34.3<br>(±11.9)    | 35.4<br>(±12.5)     | 32.7<br>(±10.8)    | 36.7<br>(±13.1)    | 37.6<br>(±13.2)    | 33.7<br>(±12.2)    | 35.1<br>(±16.2)    | 36.0<br>(±16.1)    | 30.5<br>(±15.9)    | 28.2<br>(±18.5)    | 28.5<br>(±18.5)    | 25.5<br>(±17.8)   | 33.5<br>(±13.2)         | 34.9<br>(±13.8)    | 31.3<br>(±11.8)    |
|                             | 2013 | 28.2<br>(±13.7)   | 30.0<br>(±13.7)   | 27.4<br>(±13.6)   | 34.0<br>(±10.8)    | 35.0<br>(±11.6)    | 33.4<br>(±10.1)    | 36.4<br>(±10.7)    | 37.8<br>(±11.2)     | 34.8<br>(±9.9)     | 39.4<br>(±10.7)    | 40.5<br>(±11.1)    | 37.3<br>(±9.8)     | 40.9<br>(±12.6)    | 42.0<br>(±12.4)    | 36.3<br>(±12.7)    | 39.1<br>(±17.0)    | 39.7<br>(±17.1)    | 35.0<br>(±16.0)   | 36.5<br>(±12.1)         | 38.5<br>(±12.5)    | 34.0<br>(±11.2)    |
|                             | 2019 | 31.8<br>(±14.5)   | 33.5<br>(±14.2)   | 30.7<br>(±14.5)   | 36.4<br>(±10.9)    | 37.1<br>(±11.8)    | 36.0<br>(±10.3)    | 38.4<br>(±9.8)     | 39.4<br>(±10.6)     | 39.4<br>(±10.6)    | 40.6<br>(±10.5)    | 42.0<br>(±10.8)    | 38.7<br>(±9.8)     | 43.0<br>(±11.5)    | 43.9<br>(±11.6)    | 40.8<br>(±10.9)    | 43.3<br>(±14.3)    | 43.6<br>(±14.5)    | 41.2<br>(±13.1)   | 38.1<br>(±12.0)         | 40.0<br>(±12.3)    | 36.2<br>(±11.3)    |
| Prop. Fem. Pts (mean (SD))  | 2008 | 55.7<br>(±15.1)   | 46.9<br>(±10.7)   | 60.7<br>(±14.9)   | 55.2<br>(±13.2)    | 46.2<br>(±7.5)     | 63.8<br>(±11.6)    | 54.3<br>(±13.0)    | 46.3<br>(±7.4)      | 65.3<br>(±10.9)    | 51.0<br>(±11.0)    | 46.8<br>(±7.0)     | 65.0<br>(±10.7)    | 49.5<br>(±11.1)    | 47.3<br>(±8.5)     | 61.5<br>(±15.7)    | 47.8<br>(±13.2)    | 46.7<br>(±11.1)    | 57.6<br>(±22.6)   | 53.2<br>(±12.9)         | 46.6<br>(±7.8)     | 64.0<br>(±12.1)    |
|                             | 2013 | 55.3<br>(±15.6)   | 47.8<br>(±13.7)   | 59.0<br>(±15.1)   | 55.1<br>(±12.1)    | 46.1<br>(±8.3)     | 61.2<br>(±10.4)    | 53.7<br>(±12.3)    | 45.6<br>(±7.4)      | 62.9<br>(±9.9)     | 52.4<br>(±12.1)    | 45.9<br>(±7.5)     | 64.7<br>(±9.3)     | 48.9<br>(±10.1)    | 45.9<br>(±7.2)     | 62.2<br>(±10.5)    | 49.6<br>(±12.2)    | 47.2<br>(±10.4)    | 64.8<br>(±11.9)   | 53.1<br>(±12.5)         | 46.1<br>(±8.3)     | 62.3<br>(±11.0)    |
|                             | 2019 | 54.3<br>(±13.7)   | 47.7<br>(±11.2)   | 58.2<br>(±13.6)   | 54.3<br>(±11.8)    | 45.0<br>(±8.2)     | 59.9<br>(±10.0)    | 53.5<br>(±11.2)    | 45.4<br>(±7.6)      | 60.6<br>(±8.9)     | 52.4<br>(±11.8)    | 44.8<br>(±7.8)     | 62.2<br>(±8.5)     | 49.9<br>(±11.7)    | 45.1<br>(±7.9)     | 63.0<br>(±10.2)    | 48.2<br>(±9.9)     | 45.9<br>(±8.1)     | 60.7<br>(±9.6)    | 52.9<br>(±12.0)         | 45.5<br>(±8.4)     | 60.4<br>(±10.3)    |
| FTE (N (%))                 | 2008 | 290<br>(49.0)     | 146<br>(50.3)     | 144<br>(49.7)     | 1210<br>(64.5)     | 754<br>(62.3)      | 456<br>(37.7)      | 1802<br>(73.0)     | 1173<br>(65.1)      | 629<br>(34.9)      | 1481<br>(75.1)     | 1209<br>(81.6)     | 272<br>(18.4)      | 239<br>(58.4)      | 220<br>(92.1)      | 19<br>(8.0)        | 114<br>(32.0)      | 107<br>(93.9)      | 7<br>(6.1)        | 5136<br>(66.9)          | 3609<br>(70.3)     | 1527<br>(29.7)     |
|                             | 2013 | 335<br>(45.4)     | 152<br>(45.4)     | 183<br>(54.6)     | 1073<br>(64.4)     | 556<br>(51.8)      | 517<br>(48.2)      | 1694<br>(73.3)     | 1014<br>(59.9)      | 680<br>(40.1)      | 1634<br>(75.3)     | 1156<br>(70.8)     | 478<br>(29.3)      | 474<br>(67.0)      | 415<br>(87.6)      | 59<br>(12.5)       | 189<br>(41.6)      | 177<br>(93.7)      | 12<br>(6.4)       | 5399<br>(67.1)          | 3470<br>(64.3)     | 1929<br>(35.7)     |
|                             | 2019 | 734<br>(51.9)     | 351<br>(47.8)     | 383<br>(52.2)     | 1401<br>(65.6)     | 628<br>(44.8)      | 773<br>(55.2)      | 1722<br>(76.8)     | 881<br>(51.2)       | 841<br>(48.8)      | 1681<br>(73.8)     | 1052<br>(62.6)     | 629<br>(37.4)      | 514<br>(72.6)      | 402<br>(78.2)      | 112<br>(21.8)      | 327<br>(54.6)      | 288<br>(88.1)      | 39<br>(11.9)      | 6379<br>(68.0)          | 3602<br>(56.5)     | 2777<br>(43.5)     |

Comp. FPs: Comprehensive family physicians; Pract.: Practice; PC: Primary care; Pt(s): Patient(s); Prop: Proportion; Fem: Female; FTE: Full-time equivalent

eTable 2. Family physicians in non-comprehensive (i.e., “focused” or “other”) scopes of practice over time by physician

|                                          | <35 Years |              | 35-44 Years |              | 45-54 Years |              | 55-64 Years |              | 65-69 Years |              | 70+ |
|------------------------------------------|-----------|--------------|-------------|--------------|-------------|--------------|-------------|--------------|-------------|--------------|-----|
|                                          | N         | % of all FPs | N           | % of all FPs | N           | % of all FPs | N           | % of all FPs | N           | % of all FPs | N   |
| <b>2008</b>                              | 217       | 2.2          | 463         | 4.7          | 397         | 4            | 286         | 2.9          | 84          | 0.8          | 102 |
| <b>2013</b>                              | 418       | 3.7          | 612         | 5.4          | 586         | 5.2          | 522         | 4.6          | 233         | 2.1          | 297 |
| <b>2019</b>                              | 561       | 4.2          | 677         | 5.1          | 563         | 4.2          | 654         | 4.9          | 323         | 2.4          | 426 |
| <b>Relative Change (2019/2008)</b>       |           | 194%         |             | 109%         |             | 106%         |             | 171%         |             | 289%         |     |
| <b>Absolute Change (2019 minus 2008)</b> |           | 2.05%        |             | 0.45%        |             | 0.25%        |             | 2.05%        |             | 1.59%        |     |

## 1 age group

| Years | Total - Focused/Other |      | Total - All FPs |        |
|-------|-----------------------|------|-----------------|--------|
|       | % of all FPs          | N    | % of all FPs    | N      |
| 1     | 1                     | 1549 | 15.6            | 9,944  |
| 2.6   | 2.6                   | 2668 | 23.6            | 11,288 |
| 3.2   | 3.2                   | 3204 | 24.2            | 13,269 |
|       | 312%                  |      | 155%            |        |
|       | 2.18%                 |      | 8.60%           |        |

For peer review only

**eTable 3. Comprehensive family physician practice model over time by physician age and sex**

| Year | Model | Total<br>N | Total<br>% | Age < 35   |      |            |      | Age 35 - 44 |            |            |      |            |      |
|------|-------|------------|------------|------------|------|------------|------|-------------|------------|------------|------|------------|------|
|      |       |            |            | Male       |      | Female     |      | Total<br>N  | Total<br>% | Male       |      | Female     |      |
|      |       |            |            | N          | %    | N          | %    | N           | %          | N          | %    | N          | %    |
| 2008 | EFFS  | 243        | 41         | 91         | 43.1 | 152        | 39.9 | 1009        | 53.8       | 513        | 55.6 | 496        | 51.9 |
|      | CAP   | 56         | 9.5        | *11 - 15   |      | *43 - 47   |      | 167         | 8.9        | 70         | 7.6  | 97         | 10.2 |
|      | FHT   | 85         | 14.4       | 35         | 16.6 | 50         | 13.1 | 281         | 15         | 126        | 13.7 | 155        | 16.2 |
|      | NOG   | 198        | 33.4       | 69         | 32.7 | 129        | 33.9 | 389         | 20.7       | 202        | 21.9 | 187        | 19.6 |
|      | OGP   | 10         | 1.7        | *1-5       |      | *3 - 7     |      | 31          | 1.7        | 11         | 1.2  | 20         | 2.1  |
| 2013 | EFFS  | 162        | 21.9       | 65         | 26.5 | 97         | 19.6 | 571         | 34.3       | 243        | 36.1 | 328        | 33.1 |
|      | CAP   | 108        | 14.6       | *28 - 32   |      | *76-80     |      | 361         | 21.7       | *127 - 131 |      | *229 - 233 |      |
|      | FHT   | 186        | 25.1       | 64         | 26.1 | 122        | 24.6 | 461         | 27.7       | 183        | 27.2 | *276 - 280 |      |
|      | NOG   | 277        | 37.4       | 83         | 33.9 | 194        | 39.1 | 266         | 16         | 116        | 17.2 | 150        | 15.1 |
|      | OGP   | 8          | 1.1        | *1-5       |      | *3-7       |      | 7           | 0.4        | *1-5       |      | *2 - 6     |      |
| 2019 | EFFS  | 249        | 17.6       | *103 - 107 |      | *144 - 148 |      | 518         | 24.3       | 218        | 27   | 300        | 22.6 |
|      | CAP   | 341        | 24.1       | 124        | 23.5 | 217        | 24.5 | 597         | 28         | 193        | 23.9 | 404        | 30.4 |
|      | FHT   | 376        | 26.6       | 137        | 25.9 | 239        | 27   | 683         | 32         | 252        | 31.3 | 431        | 32.4 |
|      | NOG   | 437        | 30.9       | 157        | 29.7 | 280        | 31.6 | 316         | 14.8       | 133        | 16.5 | 183        | 13.8 |
|      | OGP   | 11         | 0.8        | *3 - 7     |      | *2 - 6     |      | 21          | 1          | 10         | 1.2  | 11         | 0.8  |

Percentages are column percentages

Ranges preceded by an asterisk (\*) represent suppressed cells due to small cell sizes

EFFS: Enhanced fee-for-service. This is a fee-for-service payment model that requires patient enrollment and includes some pay enhancements, such as higher fee-for-service payments for enrolled patients.

CAP: Capitation. An alternate payment plan (APP) model where the majority of physician payments come from an annual amount for each enrolled patient adjusted for patient age and sex.

FHT: Capitation models with additional funding for interdisciplinary team members such as nurse practitioners and social workers.

NOG: No group. These physicians are paid via traditional fee-for-service, without any enrolment requirements or pay enhancements.

OGP: Other physician group types, typically serving a specific targeted population or geography (for example, rural/remote) with varying funding mechanisms.



|  | Total<br>N | Total<br>% | Age 45 - 54 |      |            |      | Age 55 - 64 |      |        |      | Total<br>N | Total<br>% |        |      |
|--|------------|------------|-------------|------|------------|------|-------------|------|--------|------|------------|------------|--------|------|
|  |            |            | Male        |      | Female     |      | Male        |      | Female |      |            |            |        |      |
|  |            |            | N           | %    | N          | %    | N           | %    | N      | %    | N          | %          |        |      |
|  | 1410       | 57.2       | 796         | 56   | 614        | 58.8 | 1184        | 60   | 903    | 59.3 | 281        | 62.4       | 210    | 51.3 |
|  | 191        | 7.7        | 114         | 8    | 77         | 7.4  | *128-132    |      | 104    | 6.8  | *24 - 28   |            | *30-34 |      |
|  | 402        | 16.3       | 228         | 16   | 174        | 16.7 | *276-280    |      | 228    | 15   | *48 - 52   |            | 48     | 11.7 |
|  | 427        | 17.3       | 256         | 18   | 171        | 16.4 | 356         | 18.1 | 268    | 17.6 | 88         | 19.6       | 118    | 28.9 |
|  | 37         | 1.5        | 28          | 2    | 9          | 0.9  | *20-24      |      | 19     | 1.2  | *1-5       |            | *1-5   |      |
|  | 853        | 36.9       | 464         | 37.8 | 389        | 35.9 | 766         | 35.3 | 481    | 34   | 285        | 37.7       | 292    | 41.3 |
|  | 582        | 25.2       | 310         | 25.3 | 272        | 25.1 | 603         | 27.8 | 407    | 28.8 | 196        | 26         | 168    | 23.8 |
|  | 547        | 23.7       | *266-270    |      | *277 - 281 |      | 501         | 23.1 | 325    | 23   | 176        | 23.3       | 127    | 18   |
|  | 313        | 13.5       | 172         | 14   | 141        | 13   | 273         | 12.6 | 183    | 12.9 | 90         | 11.9       | 110    | 15.6 |
|  | 17         | 0.7        | *11-15      |      | *2 - 6     |      | 27          | 1.2  | 19     | 1.3  | 8          | 1.1        | 10     | 1.4  |
|  | 712        | 31.8       | *348 - 352  |      | *360-364   |      | 707         | 31   | 408    | 31.6 | 299        | 30.2       | 244    | 34.5 |
|  | 699        | 31.2       | 315         | 30.1 | 384        | 32.2 | 725         | 31.8 | 399    | 30.9 | 326        | 33         | 221    | 31.2 |
|  | 583        | 26         | 255         | 24.3 | 328        | 27.5 | 577         | 25.3 | 321    | 24.9 | 256        | 25.9       | 151    | 21.3 |
|  | 237        | 10.6       | 123         | 11.7 | 114        | 9.5  | 241         | 10.6 | 141    | 10.9 | 100        | 10.1       | 82     | 11.6 |
|  | 11         | 0.5        | *3 - 7      |      | *4-8       |      | 29          | 1.3  | 21     | 1.6  | 8          | 0.8        | *6-10  |      |

patients and bonus payments for preventive care targets.

|            | Age 65 - 69 |      |          |      |       |      | Age 70+    |      |          |      |       |      | Total Sample |      |
|------------|-------------|------|----------|------|-------|------|------------|------|----------|------|-------|------|--------------|------|
|            | Male        |      | Female   |      | Total |      | Male       |      | Female   |      | Total |      | Male         |      |
|            | N           | %    | N        | %    | N     | %    | N          | %    | N        | %    | N     | %    | N            | %    |
|            | 174         | 50.1 | 36       | 58.1 | 142   | 39.9 | 129        | 40.4 | 13       | 35.1 | 4198  | 54.7 | 2606         | 54.9 |
| *27 - 31   |             |      | *1 - 5   |      | 7     | 2    | 7          | 2.2  | 0        | 0    | 583   | 7.6  | 337          | 7.1  |
| *43-47     |             |      | *1 - 5   |      | 17    | 4.8  | *12-16     |      | *1 - 5   |      | 1113  | 14.5 | 680          | 14.3 |
| *94-98     |             |      | *20 - 24 |      | 190   | 53.4 | *163-167   |      | *23 - 27 |      | 1678  | 21.9 | 1056         | 22.3 |
| *1-5       |             |      | 0        | 0    | 0     | 0    | 0          | 0    | 0        | 0    | 101   | 1.3  | 64           | 1.3  |
|            | 218         | 37.8 | 74       | 56.5 | 173   | 38.1 | 149        | 38   | 24       | 38.7 | 2817  | 35   | 1620         | 35.8 |
|            | 146         | 25.3 | 22       | 16.8 | 75    | 16.5 | *65-69     |      | *6 - 10  |      | 1897  | 23.6 | 1091         | 24.1 |
|            | 114         | 19.8 | 13       | 9.9  | 55    | 12.1 | *50-54     |      | *1 - 5   |      | 1877  | 23.3 | 1007         | 22.2 |
|            | 88          | 15.3 | 22       | 16.8 | 151   | 33.3 | 124        | 31.6 | 27       | 43.5 | 1390  | 17.3 | 766          | 16.9 |
|            | 10          | 1.7  | 0        | 0    | 0     | 0    | 0          | 0    | 0        | 0    | 69    | 0.9  | 45           | 1    |
| *163 - 167 |             |      | *75 - 79 |      | 239   | 39.9 | *190 - 194 |      | 48       | 51.1 | 2669  | 28.5 | 1437         | 30.6 |
|            | 176         | 33.9 | 45       | 23.8 | 165   | 27.5 | 146        | 28.9 | 19       | 20.2 | 2748  | 29.3 | 1353         | 28.8 |
|            | 109         | 21   | 42       | 22.2 | 79    | 13.2 | 71         | 14.1 | 8        | 8.5  | 2449  | 26.1 | 1145         | 24.4 |
|            | 64          | 12.3 | 22       | 11.6 | 112   | 18.7 | 93         | 18.4 | 19       | 20.2 | 1429  | 15.2 | 711          | 15.1 |
| *3 - 7     |             |      | *1-5     |      | *1-5  |      | *1-5       |      | 0        | 0    | 82    | 0.9  | 50           | 1.1  |

1  
2  
3  
4  
5  
6  
7  
8  
9  
10  
11  
12  
13  
14  
15  
16  
17  
18  
19  
20  
21  
22  
23  
24  
25  
26  
27  
28  
29  
30  
31  
32  
33  
34  
35  
36  
37  
38  
39  
40  
41  
42  
43  
44  
45  
46

| Female |      |
|--------|------|
| N      | %    |
| 1592   | 54.3 |
| 246    | 8.4  |
| 433    | 14.8 |
| 622    | 21.2 |
| 37     | 1.3  |
| 1197   | 34   |
| 806    | 22.9 |
| 870    | 24.7 |
| 624    | 17.7 |
| 24     | 0.7  |
| 1232   | 26.3 |
| 1395   | 29.8 |
| 1304   | 27.9 |
| 718    | 15.3 |
| 32     | 0.7  |

For peer review only

## eTable 4. Geographic Distribution of Comprehensive FPs

### *A. Comprehensive FPs by Geography*

|                            | Large Urban  | Urban        | Small Urban/Suburban | Rural/Remote | Total         |
|----------------------------|--------------|--------------|----------------------|--------------|---------------|
| <b>2008</b>                |              |              |                      |              |               |
| N (% of Comprehensive FPs) | 3,909 (51.1) | 1,990 (26.0) | 1,236 (16.2)         | 513 (6.7)    | 7,648 (100.0) |
| <b>2013</b>                |              |              |                      |              |               |
| N (% of Comprehensive FPs) | 4,105 (51.1) | 2,314 (28.8) | 1,207 (15.0)         | 410 (5.1)    | 8,036 (100.0) |
| <b>2019</b>                |              |              |                      |              |               |
| N (% of Comprehensive FPs) | 4,674 (50.0) | 2,685 (28.7) | 14,98 (16.0)         | 492 (5.3)    | 9,349 (100.0) |

Note: Geographic data missing for: 2008 (25), 2013 (14), 2019 (28)

### *B. Rural (RIO 40+) Comprehensive FPs by Age Group*

|                                  | <35 years | 35-44 years | 45-54 years | 55-64 years | 65-69 years | 70+ years | Total       |
|----------------------------------|-----------|-------------|-------------|-------------|-------------|-----------|-------------|
| <b>2008</b>                      |           |             |             |             |             |           |             |
| N (% of rural comprehensive FPs) | 46 (9.0)  | 135 (26.3)  | 166 (32.4)  | 118 (23.0)  | 27 (5.3)    | 21 (4.1)  | 513 (100.0) |
| <b>2013</b>                      |           |             |             |             |             |           |             |
| N (% of rural comprehensive FPs) | 31 (7.6)  | 76 (18.5)   | 109 (26.6)  | 129 (31.5)  | 44 (10.7)   | 21 (5.1)  | 410 (100.0) |
| <b>2019</b>                      |           |             |             |             |             |           |             |
| N (% of rural comprehensive FPs) | 89 (18.1) | 111 (22.6)  | 121 (24.6)  | 117 (23.8)  | 32 (6.5)    | 22 (4.5)  | 492 (100.0) |

C. Rural (RIO 40+) Comprehensive FPs by Physicians Sex

|             | Male Physicians |                              |                            | Female Physicians |                              |                            | Total Rural |                            |
|-------------|-----------------|------------------------------|----------------------------|-------------------|------------------------------|----------------------------|-------------|----------------------------|
|             | N               | % of Rural Comprehensive FPs | % of all Comprehensive FPs | N                 | % of Rural Comprehensive FPs | % of all Comprehensive FPs | N           | % of all Comprehensive FPs |
| <b>2008</b> | 362             | 70.6                         | 4.7                        | 151               | 29.4                         | 2                          | 513         | 6.7                        |
| <b>2013</b> | 268             | 65.4                         | 3.3                        | 142               | 34.6                         | 1.8                        | 410         | 5.1                        |
| <b>2019</b> | 279             | 56.7                         | 3                          | 213               | 43.3                         | 2.3                        | 492         | 5.3                        |

We were unable to stratify by both age and sex due to suppressed cells (cell sizes <6) in older age categories for male and female physicians in the rural category.

Large urban: Rurality Index of Ontario (RIO) score of 0

Urban: RIO score of 1-9

Suburban/Small Urban: RIO score of 10-39

Rural/remote: RIO score of 40+

1  
2  
3  
4  
5  
6  
7  
8  
9  
10  
11  
12  
13  
14  
15  
16  
17  
18  
19  
20  
21  
22  
23  
24  
25  
26  
27  
28  
29  
30  
31  
32  
33  
34  
35  
36  
37  
38  
39  
40  
41  
42  
43  
44  
45  
46

For peer review only

1  
2  
3  
4  
5  
6  
7  
8  
9  
10  
11  
12  
13  
14  
15  
16  
17  
18  
19  
20  
21  
22  
23  
24  
25  
26  
27  
28  
29  
30  
31  
32  
33  
34  
35  
36  
37  
38  
39  
40  
41  
42  
43  
44  
45  
46

| All Comprehensive FPs |                            |
|-----------------------|----------------------------|
| N                     | % of all Comprehensive FPs |
| 7648                  | 6.7                        |
| 8036                  | 5.1                        |
| 9349                  | 5.3                        |

For peer review only

**eTable 5. Practice characteristics: Medical and social complexity of patients attached to comprehensive family physicians over time by physician age and sex**

|                                                           |      | <35 Years |      |      | 35-44 Years |      |      | 45-54 Years |      |      | 55-64 Years |      |      | 65-69 Years |      |      | 70+ Years |      |      | TOTAL |      |      |
|-----------------------------------------------------------|------|-----------|------|------|-------------|------|------|-------------|------|------|-------------|------|------|-------------|------|------|-----------|------|------|-------|------|------|
|                                                           |      | Total     | M    | F    | Total       | M    | F    | Total       | M    | F    | Total       | M    | F    | Total       | M    | F    | Total     | M    | F    | Total | M    | F    |
|                                                           |      | %         | %    | %    | %           | %    | %    | %           | %    | %    | %           | %    | %    | %           | %    | %    | %         | %    | %    | %     | %    | %    |
| <b>Highest morbidity (RUB (4+))</b>                       | 2008 | 15.3      | 14.7 | 15.6 | 16.2        | 15.8 | 16.7 | 16.4        | 16.5 | 16.2 | 17.3        | 17.5 | 16.6 | 16.8        | 17.2 | 14.0 | 14.0      | 14.1 | 13.0 | 16.5  | 16.7 | 16.3 |
|                                                           | 2013 | 17.5      | 17.6 | 17.4 | 18.2        | 17.5 | 18.7 | 17.7        | 17.8 | 17.6 | 18.1        | 18.5 | 17.3 | 19.5        | 20.0 | 17.5 | 20.1      | 20.5 | 17.9 | 18.1  | 18.3 | 17.8 |
|                                                           | 2019 | 19.3      | 19.4 | 19.2 | 20.6        | 20.2 | 20.8 | 19.4        | 19.4 | 19.4 | 19.5        | 20.2 | 18.7 | 20.3        | 20.4 | 20.1 | 21.4      | 21.5 | 21.3 | 19.8  | 19.9 | 19.7 |
| <b>Lowest income quintile</b>                             | 2008 | 18.5      | 19.2 | 18.1 | 18.1        | 19.6 | 16.6 | 18.4        | 19.8 | 16.4 | 19.9        | 20.2 | 18.8 | 22.6        | 22.5 | 23.6 | 23.9      | 20.1 | 17.2 | 19.0  | 20.1 | 17.2 |
|                                                           | 2013 | 18.9      | 20.6 | 18.0 | 17.2        | 19.1 | 16.0 | 18.0        | 19.4 | 16.4 | 18.4        | 19.5 | 16.5 | 20.5        | 20.4 | 21.2 | 24.0      | 24.2 | 22.5 | 18.3  | 19.6 | 16.7 |
|                                                           | 2019 | 20.4      | 21.9 | 20.7 | 18.8        | 20.7 | 17.6 | 18.3        | 20.5 | 16.5 | 18.8        | 20.4 | 16.8 | 19.9        | 20.7 | 17.9 | 22.1      | 22.2 | 21.4 | 19.0  | 20.7 | 17.5 |
| <b>Highest housing instability quintile</b>               | 2008 | 24.5      | 22.8 | 25.5 | 20.6        | 20.7 | 20.4 | 20.4        | 20.4 | 20.4 | 21.9        | 21.6 | 23.0 | 24.0        | 23.1 | 29.2 | 25.5      | 25.6 | 24.2 | 21.4  | 21.2 | 21.7 |
|                                                           | 2013 | 26.0      | 23.6 | 27.2 | 21.8        | 20.9 | 22.5 | 19.9        | 20.4 | 19.4 | 20.8        | 20.6 | 21.3 | 21.7        | 21.8 | 21.2 | 24.5      | 24.1 | 26.6 | 21.4  | 20.9 | 21.9 |
|                                                           | 2019 | 26.5      | 25.3 | 27.2 | 24.5        | 24.7 | 24.5 | 21.1        | 21.8 | 20.4 | 21.4        | 21.5 | 21.3 | 22.6        | 21.7 | 24.9 | 25.5      | 25.2 | 27.1 | 23.0  | 22.7 | 23.3 |
| <b>Highest material deprivation quintile</b>              | 2008 | 18.6      | 19.8 | 17.9 | 17.4        | 19.3 | 15.5 | 18.2        | 20.1 | 15.6 | 20.5        | 21.3 | 18.1 | 23.7        | 23.9 | 22.4 | 25.7      | 26.2 | 21.3 | 19.0  | 20.6 | 16.4 |
|                                                           | 2013 | 22.9      | 24.6 | 22.0 | 20.5        | 22.1 | 19.4 | 21.2        | 22.9 | 19.3 | 21.4        | 22.6 | 19.2 | 23.7        | 23.2 | 25.7 | 29.2      | 29.4 | 27.8 | 21.5  | 22.8 | 19.9 |
|                                                           | 2019 | 18.2      | 19.7 | 17.3 | 17.3        | 19.9 | 15.8 | 17.0        | 19.3 | 15.0 | 18.1        | 19.8 | 15.9 | 19.7        | 20.9 | 16.7 | 21.8      | 22.1 | 19.9 | 17.8  | 19.8 | 15.9 |
| <b>Highest neighborhood ethnic concentration quintile</b> | 2008 | 27.4      | 30.8 | 25.5 | 27.5        | 28.4 | 26.5 | 26.0        | 26.1 | 25.9 | 27.2        | 26.3 | 30.4 | 28.0        | 26.4 | 37.2 | 32.6      | 32.8 | 30.7 | 26.9  | 26.9 | 27.0 |
|                                                           | 2013 | 29.9      | 31.1 | 29.2 | 28.6        | 29.2 | 28.2 | 27.9        | 29.2 | 26.6 | 27.2        | 27.2 | 27.3 | 27.7        | 25.5 | 37.3 | 33.0      | 32.0 | 39.4 | 28.0  | 28.1 | 28.0 |
|                                                           | 2019 | 26.0      | 26.6 | 25.7 | 25.8        | 27.2 | 25.0 | 28.5        | 29.2 | 27.8 | 27.0        | 26.8 | 27.3 | 33.2        | 33.7 | 31.9 | 32.1      | 30.9 | 38.5 | 27.4  | 28.3 | 26.7 |

Interpretation: For example, in 2008, within the group of comprehensive family physicians under the age of 35 years, 15.3% of patients in those practices had the highest level of morbidity (RUB 4+). When further stratified by physician sex, 14.7% of patients attached to male comprehensive family physicians belonged to the highest morbidity (RUB 4+) group.

RUB: Morbidity, based on Resource Utilization Band



### **eMethods. Data sources, cohort definitions, and variable definitions**

We obtained study data from population-level, de-identified, linked health administrative databases housed at ICES. ICES is an independent, non-profit research institute whose legal status under Ontario's health information privacy law allows it to collect and analyze healthcare and demographic data, without consent, for health system evaluation and improvement. Secure access to these data is governed by policies and procedures that are approved by the Information and Privacy Commissioner of Ontario. In 2018, the institute formerly known as the Institute for Clinical Evaluative Sciences formally adopted the initialism ICES as its official name. This change acknowledges the growth and evolution of the organization's research since its inception in 1992, while retaining the familiarity of the former acronym within the scientific community and beyond.

The dataset from this study is held securely in coded form at ICES. While legal data sharing agreements between ICES and data providers (e.g., healthcare organizations and government) prohibit ICES from making the dataset publicly available, access may be granted to those who meet pre-specified criteria for confidential access, available at [www.ices.on.ca/DAS](http://www.ices.on.ca/DAS) (email: [das@ices.on.ca](mailto:das@ices.on.ca)). The full dataset creation plan and underlying analytic code are available from the authors upon request, understanding that the computer programs may rely upon coding templates or macros that are unique to ICES and are therefore either inaccessible or may require modification.

These datasets were linked using unique encoded identifiers and analyzed at ICES.

The index date for each covariate was the fiscal year-end for each time point: March 31, 2008, March 31, 2013, March 31, 2019.

Physician-level data came from the ICES Physician Database (age, sex, years in practice, practice specialty, practice type, full-time equivalence), the Primary Care Population database (geographic location, roster size, primary care model), and Ontario Health Insurance Plan (OHIP) billings (health services rendered). For physicians for whom birth month and date were missing, we imputed physician age based on birth year, with fiscal year end (March 31) as the index date. Physician gender is not available in ICES data, so physician sex was used instead, available as male and female.

Patient-level data came from the Registered Persons Database (age, sex, postal code, immigration status), the Client Agency Program Enrolment (CAPE) database (primary care enrolment model), the Community Health Centre database (CHC) (patients receiving health services at CHCs, which serve vulnerable patients), census data holdings (income quintiles and other marginalization indices), OHIP database (health services claims and associated diagnoses), Discharge Abstract Database linkages with OHIP (mental health diagnosis), and Johns Hopkins Adjusted Clinical Groups (frailty, resource utilization band).

Resource Utilization Bands (RUB): This was measured using the Johns Hopkins Adjusted Clinical Groups (ACG) Version 10.0. The RUB measure assesses expected health care use as a measure of patient complexity/morbidity.

1  
2  
3 Annual number of core primary care visits were based on activity billing codes for 22 primary  
4 care service types in the 12 months preceding the index date.

6  
7 Rurality: We measured rurality using the practice postal code and the Rurality Index for Ontario  
8 (RIO) scoring methodology,<sup>1</sup> with the following categories: Large urban (score 0), Urban (score  
9 1-9), Small Urban/Suburban (score 10–39), and Rural/Remote (score  $\geq 40$ ).

10  
11 Full-time equivalency (FTE): FTE was calculated based on payments from all sources, with a  
12 40th percentile cut-point corresponding with a FTE of 1.0.

13  
14 Chronic diseases (COPD, CHF, Diabetes): These were measured using validated cohorts at  
15 ICES. The algorithm used to define cohorts varies slightly for each chronic condition, based on  
16 the original ICES algorithm for diabetes (i.e., two physician claims or one hospital admission  
17 with diabetes within two years). These disease cohorts are cumulative over time.

19  
20 Frailty: This was measured using the Johns Hopkins Adjusted Clinical Groups (ACG) Version  
21 10.0 frailty defining diagnoses indicator, which captures patients with multidimensional frailty at  
22 the population level and is based on 10 clusters of frailty defining dimensions: Malnutrition,  
23 dementia, impaired vision, decubitus ulcer, incontinence of urine, loss of weight, poverty,  
24 barriers to access to care, difficulty in walking, and falls. The indicator has been demonstrated to  
25 accurately identify patients with limitations in activities of daily living.

27  
28 Mental illness: The case definition algorithm to identify patients with a mental health diagnosis  
29 over the last two years links two databases at ICES: The Discharge Abstract Databases (DAD)  
30 and OHIP. It is based on having two physician billing claims in OHIP over 2 years or one  
31 hospitalization with one of the listed mental health service codes (ICD9/ICD10).

33  
34 Marginalization: We assessed three dimensions of marginalization (residential instability,  
35 material deprivation, and neighborhood ethnic concentration) using the Ontario Marginalization  
36 Index,<sup>2</sup> a census-derived geographically-based index.

37  
38 Physician-level continuity of care (CoC): The algorithm considers patients to be virtually  
39 attached a primary care physician if they received the majority of their primary care over the  
40 preceding 2-year period from a physician with greater than 10% physician-level continuity of  
41 care (CoC). Physician-level CoC is a visit-based measure of the proportion of an individual  
42 physician visits over all physician's visits over a two-year time period. The numerator is the  
43 number of patients virtually attached to a physician, and the denominator is all unique patients  
44 the same physician had seen over two years. If the physician CoC is less than or equal to 10%,  
45 then this physician had a low CoC.

#### 47 48 **References:**

- 49  
50 1. Kralj B. *Measuring 'Rurality' for Purposes of Health-Care Planning: An Empirical*  
51 *Measure for Ontario.*; 2009.  
52  
53 2. Matheson F, Moloney G, van Ingen T, Public Health Ontario. *2016 Ontario*  
54 *Marginalization Index: User Guide, 1st Revision.*; 2022.  
55 <https://www.publichealthontario.ca/-/media/documents/o/2017/on-marg->  
56  
57  
58  
59

1  
2  
3  
4  
5  
6  
7  
8  
9  
10  
11  
12  
13  
14  
15  
16  
17  
18  
19  
20  
21  
22  
23  
24  
25  
26  
27  
28  
29  
30  
31  
32  
33  
34  
35  
36  
37  
38  
39  
40  
41  
42  
43  
44  
45  
46  
47  
48  
49  
50  
51  
52  
53  
54  
55  
56  
57  
58  
59  
60

userguide.pdf?la=en

For peer review only

STROBE Statement—Checklist of items that should be included in reports of *cross-sectional studies*

|                           | Item No | Recommendation                                                                                                                                                                                    | Page No                    |
|---------------------------|---------|---------------------------------------------------------------------------------------------------------------------------------------------------------------------------------------------------|----------------------------|
| <b>Title and abstract</b> | 1       | (a) Indicate the study's design with a commonly used term in the title or the abstract                                                                                                            | 1, 2-3                     |
|                           |         | (b) Provide in the abstract an informative and balanced summary of what was done and what was found                                                                                               | 2-3                        |
| <b>Introduction</b>       |         |                                                                                                                                                                                                   |                            |
| Background/rationale      | 2       | Explain the scientific background and rationale for the investigation being reported                                                                                                              | 4-5                        |
| Objectives                | 3       | State specific objectives, including any prespecified hypotheses                                                                                                                                  | 5                          |
| <b>Methods</b>            |         |                                                                                                                                                                                                   |                            |
| Study design              | 4       | Present key elements of study design early in the paper                                                                                                                                           | 6                          |
| Setting                   | 5       | Describe the setting, locations, and relevant dates, including periods of recruitment, exposure, follow-up, and data collection                                                                   | 6                          |
| Participants              | 6       | (a) Give the eligibility criteria, and the sources and methods of selection of participants                                                                                                       | 6-7                        |
| Variables                 | 7       | Clearly define all outcomes, exposures, predictors, potential confounders, and effect modifiers. Give diagnostic criteria, if applicable                                                          | 6-7, Supplement (eMethods) |
| Data sources/measurement  | 8*      | For each variable of interest, give sources of data and details of methods of assessment (measurement). Describe comparability of assessment methods if there is more than one group              | 6-7, Supplement (eMethods) |
| Bias                      | 9       | Describe any efforts to address potential sources of bias                                                                                                                                         | Figure 1a, 1b              |
| Study size                | 10      | Explain how the study size was arrived at                                                                                                                                                         | 6-8, Figure 1a, 1b         |
| Quantitative variables    | 11      | Explain how quantitative variables were handled in the analyses. If applicable, describe which groupings were chosen and why                                                                      | 7-8                        |
| Statistical methods       | 12      | (a) Describe all statistical methods, including those used to control for confounding                                                                                                             | 7-8                        |
|                           |         | (b) Describe any methods used to examine subgroups and interactions                                                                                                                               | 7-8                        |
|                           |         | (c) Explain how missing data were addressed                                                                                                                                                       | 7, Supplement (eTable 4)   |
|                           |         | (d) If applicable, describe analytical methods taking account of sampling strategy                                                                                                                | n/a                        |
|                           |         | (e) Describe any sensitivity analyses                                                                                                                                                             | n/a                        |
| <b>Results</b>            |         |                                                                                                                                                                                                   |                            |
| Participants              | 13*     | (a) Report numbers of individuals at each stage of study—eg numbers potentially eligible, examined for eligibility, confirmed eligible, included in the study, completing follow-up, and analysed | 8, Figure 1a, 1b           |
|                           |         | (b) Give reasons for non-participation at each stage                                                                                                                                              | 8, Figure 1a, 1b           |
|                           |         | (c) Consider use of a flow diagram                                                                                                                                                                | Figure 1a, 1b              |

|                          |     |                                                                                                                                                                                                              |                                      |
|--------------------------|-----|--------------------------------------------------------------------------------------------------------------------------------------------------------------------------------------------------------------|--------------------------------------|
| Descriptive data         | 14* | (a) Give characteristics of study participants (eg demographic, clinical, social) and information on exposures and potential confounders                                                                     | 8-16                                 |
|                          |     | (b) Indicate number of participants with missing data for each variable of interest                                                                                                                          | Figure 1a, 1b, Supplement (eTable 4) |
| Outcome data             | 15* | Report numbers of outcome events or summary measures                                                                                                                                                         | 8-16                                 |
| Main results             | 16  | (a) Give unadjusted estimates and, if applicable, confounder-adjusted estimates and their precision (eg, 95% confidence interval). Make clear which confounders were adjusted for and why they were included | 8-16                                 |
|                          |     | (b) Report category boundaries when continuous variables were categorized                                                                                                                                    | n/a                                  |
|                          |     | (c) If relevant, consider translating estimates of relative risk into absolute risk for a meaningful time period                                                                                             | n/a                                  |
| Other analyses           | 17  | Report other analyses done—eg analyses of subgroups and interactions, and sensitivity analyses                                                                                                               | n/a                                  |
| <b>Discussion</b>        |     |                                                                                                                                                                                                              |                                      |
| Key results              | 18  | Summarise key results with reference to study objectives                                                                                                                                                     | 16-17                                |
| Limitations              | 19  | Discuss limitations of the study, taking into account sources of potential bias or imprecision. Discuss both direction and magnitude of any potential bias                                                   | 18                                   |
| Interpretation           | 20  | Give a cautious overall interpretation of results considering objectives, limitations, multiplicity of analyses, results from similar studies, and other relevant evidence                                   | 16-18                                |
| Generalisability         | 21  | Discuss the generalisability (external validity) of the study results                                                                                                                                        | 17-18                                |
| <b>Other information</b> |     |                                                                                                                                                                                                              |                                      |
| Funding                  | 22  | Give the source of funding and the role of the funders for the present study and, if applicable, for the original study on which the present article is based                                                | 19                                   |

\*Give information separately for exposed and unexposed groups.

**Note:** An Explanation and Elaboration article discusses each checklist item and gives methodological background and published examples of transparent reporting. The STROBE checklist is best used in conjunction with this article (freely available on the Web sites of PLoS Medicine at <http://www.plosmedicine.org/>, Annals of Internal Medicine at <http://www.annals.org/>, and Epidemiology at <http://www.epidem.com/>). Information on the STROBE Initiative is available at [www.strobe-statement.org](http://www.strobe-statement.org).

# BMJ Open

## The characteristics of patients attached to near-retirement family physicians: a population-based serial cross-sectional study in Ontario, Canada

|                                 |                                                                                                                                                                                                                                                                                                                                                                                                                                                                                                                                                                                                                                                                                                                                                                                                                                                                                                                                                                                                                                                                                    |
|---------------------------------|------------------------------------------------------------------------------------------------------------------------------------------------------------------------------------------------------------------------------------------------------------------------------------------------------------------------------------------------------------------------------------------------------------------------------------------------------------------------------------------------------------------------------------------------------------------------------------------------------------------------------------------------------------------------------------------------------------------------------------------------------------------------------------------------------------------------------------------------------------------------------------------------------------------------------------------------------------------------------------------------------------------------------------------------------------------------------------|
| Journal:                        | <i>BMJ Open</i>                                                                                                                                                                                                                                                                                                                                                                                                                                                                                                                                                                                                                                                                                                                                                                                                                                                                                                                                                                                                                                                                    |
| Manuscript ID                   | bmjopen-2023-074120.R1                                                                                                                                                                                                                                                                                                                                                                                                                                                                                                                                                                                                                                                                                                                                                                                                                                                                                                                                                                                                                                                             |
| Article Type:                   | Original research                                                                                                                                                                                                                                                                                                                                                                                                                                                                                                                                                                                                                                                                                                                                                                                                                                                                                                                                                                                                                                                                  |
| Date Submitted by the Author:   | 04-Oct-2023                                                                                                                                                                                                                                                                                                                                                                                                                                                                                                                                                                                                                                                                                                                                                                                                                                                                                                                                                                                                                                                                        |
| Complete List of Authors:       | Premji, Kamila; University of Western Ontario, Department of Family Medicine; University of Ottawa, Department of Family Medicine<br>Green, Michael; Queen's University, Department of Family Medicine; Queen's University, Health Services and Policy Research Institute<br>Glazier, Richard; Institute for Clinical Evaluative Sciences; St Michael's Hospital, MAP Centre for Urban Health Solutions<br>Khan, Shahriar; Institute for Clinical Evaluative Sciences; Queen's University, Health Services and Policy Research Institute<br>Schultz, Susan; Institute for Clinical Evaluative Sciences<br>Mathews, Maria; University of Ottawa, Department of Family Medicine; University of Western Ontario, Department of Epidemiology and Biostatistics<br>Nastos, Steve; Ontario Medical Association, Economics, Policy & Research<br>Frymire, Eliot; Queen's University, Health Services and Policy Research Institute<br>Ryan, BL; University of Western Ontario, Department of Family Medicine; University of Western Ontario, Department of Epidemiology and Biostatistics |
| <b>Primary Subject Heading</b>: | General practice / Family practice                                                                                                                                                                                                                                                                                                                                                                                                                                                                                                                                                                                                                                                                                                                                                                                                                                                                                                                                                                                                                                                 |
| Secondary Subject Heading:      | Health services research, Health policy                                                                                                                                                                                                                                                                                                                                                                                                                                                                                                                                                                                                                                                                                                                                                                                                                                                                                                                                                                                                                                            |
| Keywords:                       | Primary Health Care, Health policy < HEALTH SERVICES ADMINISTRATION & MANAGEMENT, Health Services Accessibility, Human resource management < HEALTH SERVICES ADMINISTRATION & MANAGEMENT, Physicians                                                                                                                                                                                                                                                                                                                                                                                                                                                                                                                                                                                                                                                                                                                                                                                                                                                                               |
|                                 |                                                                                                                                                                                                                                                                                                                                                                                                                                                                                                                                                                                                                                                                                                                                                                                                                                                                                                                                                                                                                                                                                    |

SCHOLARONE™  
Manuscripts



I, the Submitting Author has the right to grant and does grant on behalf of all authors of the Work (as defined in the below author licence), an exclusive licence and/or a non-exclusive licence for contributions from authors who are: i) UK Crown employees; ii) where BMJ has agreed a CC-BY licence shall apply, and/or iii) in accordance with the terms applicable for US Federal Government officers or employees acting as part of their official duties; on a worldwide, perpetual, irrevocable, royalty-free basis to BMJ Publishing Group Ltd ("BMJ") its licensees and where the relevant Journal is co-owned by BMJ to the co-owners of the Journal, to publish the Work in this journal and any other BMJ products and to exploit all rights, as set out in our [licence](#).

The Submitting Author accepts and understands that any supply made under these terms is made by BMJ to the Submitting Author unless you are acting as an employee on behalf of your employer or a postgraduate student of an affiliated institution which is paying any applicable article publishing charge ("APC") for Open Access articles. Where the Submitting Author wishes to make the Work available on an Open Access basis (and intends to pay the relevant APC), the terms of reuse of such Open Access shall be governed by a Creative Commons licence – details of these licences and which [Creative Commons](#) licence will apply to this Work are set out in our licence referred to above.

Other than as permitted in any relevant BMJ Author's Self Archiving Policies, I confirm this Work has not been accepted for publication elsewhere, is not being considered for publication elsewhere and does not duplicate material already published. I confirm all authors consent to publication of this Work and authorise the granting of this licence.

1  
2  
3 **TITLE: The characteristics of patients attached to near-retirement family physicians: a**  
4 **population-based serial cross-sectional study in Ontario, Canada**  
5

6 Kamila Premji<sup>1,2</sup> MD, PhD(c) – corresponding author, [kpemji2@uottawa.ca](mailto:kpemji2@uottawa.ca), 201-381 Kent  
7 Street, Ottawa, ON, K2P 2A8, 613-760-3707  
8

9 Michael E Green<sup>3,4</sup> MD, MPH  
10

11 Richard H Glazier<sup>5,6</sup> MD, MPH  
12

13 Shahriar Khan<sup>4,5</sup> PhD  
14

15 Susan E Schultz<sup>5</sup> MA, MSc  
16

17 Maria Mathews<sup>2,7</sup> PhD  
18

19 Steve Nastos<sup>8</sup> MA  
20

21 Eliot Frymire<sup>4</sup> MA  
22

23 Bridget L Ryan<sup>1,7</sup> PhD  
24  
25  
26

27 <sup>1</sup> Department of Family Medicine, University of Western Ontario, London, Ontario, Canada

28 <sup>2</sup> Department of Family Medicine, University of Ottawa, Ottawa, Ontario, Canada

29 <sup>3</sup> Department of Family Medicine, Queen's University, Kingston, Ontario, Canada

30 <sup>4</sup> Health Services and Policy Research Institute, Queen's University, Kingston, Ontario, Canada

31 <sup>5</sup> ICES, Toronto, Ontario, Canada

32 <sup>6</sup> MAP Centre for Urban Health Solutions, St. Michael's Hospital, Toronto, Ontario, Canada

33 <sup>7</sup> Department of Epidemiology and Biostatistics, University of Western Ontario, London,  
34 Ontario, Canada

35 <sup>8</sup> Economics, Policy & Research, Ontario Medical Association, Toronto, Ontario, Canada  
36  
37  
38  
39  
40  
41  
42  
43  
44  
45  
46  
47  
48  
49  
50  
51  
52  
53  
54  
55  
56  
57  
58  
59  
60



## ABSTRACT

**Objectives:** Population aging is a global phenomenon. Resultant healthcare workforce shortages are anticipated. To ensure access to comprehensive primary care, which correlates with improved health outcomes, equity, and costs, data to inform workforce planning are urgently needed. We examined the medical and social characteristics of patients attached to near-retirement comprehensive primary care physicians over time, and explored the early- and mid-career workforce's capacity to absorb these patients.

**Design:** A serial cross-sectional population-based analysis using health administrative data.

**Setting:** Ontario, Canada, where most comprehensive primary care is delivered by family physicians (FPs) under universal insurance.

**Participants:** All insured Ontario residents at three time points: 2008 (12,936,360), 2013 (13,447,365), and 2019 (14,388,566) and all Ontario physicians who billed primary care services (2008: 11,566; 2013: 12,693; 2019: 15,054).

**Outcome Measures:** The number, proportion, and health and social characteristics of patients attached to near-retirement age comprehensive FPs over time; the number, proportion, and characteristics of near-retirement age comprehensive FPs over time. Secondary Outcome Measures: The characteristics of patients and their early- and mid-career comprehensive FPs.

**Results:** Patient attachment to comprehensive FPs increased over time. The overall FP workforce grew, but the proportion practicing comprehensiveness declined (2008: 77.2%, 2019: 70.7%). Over time, an increasing proportion of the comprehensive FP workforce was near retirement age. Correspondingly, an increasing proportion of patients were attached to near-retirement physicians. By 2019, 13.9% of comprehensive FPs were 65 years or older,

1  
2  
3 corresponding to 1,695,126 (14.8%) patients. Mean patient age increased, and all physicians  
4 served markedly increasing numbers of medically and socially complex patients.  
5  
6  
7

8 **Conclusions:** The primary care sector faces capacity challenges as both patients and physicians  
9 age and fewer physicians practice comprehensiveness. Nearly 15% (1.7 million) of Ontarians  
10 may lose their comprehensive FP to retirement between 2019 and 2025. To serve a growing,  
11 increasingly complex population, innovative solutions are needed.  
12  
13  
14  
15  
16  
17  
18  
19  
20

## 21 **STRENGTHS AND LIMITATIONS OF THIS STUDY**

- 22  
23  
24 • Our serial cross-sectional study uses large, population-level health administrative datasets  
25 to examine temporal trends in the needs of primary care patients who may soon lose their  
26 family physician to retirement, in turn informing future workforce planning.  
27  
28
- 29  
30  
31 • By distinguishing between family physicians practicing comprehensive primary care and  
32 those who have narrowed their scope of practice, our methodology allows us to identify  
33 disparities between the presumed and actual primary care supply.  
34  
35
- 36  
37  
38 • By linking the characteristics, including age and sex, of the comprehensive primary care  
39 workforce to both the medical and social characteristics of the population served, our  
40 methodology facilitates a rich understanding of the resources needed by patients who  
41 may soon lose their FP to retirement, and the capacity to meet those needs among those  
42 who will remain in the workforce.  
43  
44
- 45  
46  
47 • Our methodology allows us to identify trends related to practice preferences among  
48 family physicians that can be in turn applied to other data sources around primary care  
49 trainees and population growth.  
50  
51  
52  
53  
54  
55  
56  
57  
58  
59  
60

- Limitations to this work include the following: i) our analyses predate the COVID-19 pandemic due to limited data availability for more recent years and, ii) the number of comprehensive FPs in rural areas may be underestimated due to rural physician practice patterns possibly involving a large proportion of hospital-based services.

For peer review only

## INTRODUCTION

Primary care is the foundation of high-performing health care systems worldwide,<sup>1</sup> and can be defined by four core functions (“the 4 Cs”) articulated by Starfield and others: first *Contact* access to the healthcare system, *Continuity* (long-term person-focused care), *Comprehensiveness* (meeting the majority of each patient’s physical and mental health care needs, including prevention, acute care, chronic care, and multimorbidity care), and *Coordination* of care across the healthcare system, including specialty care, hospitals, home care, and community services and support.[1, 2] Access to primary care is associated with improved health outcomes, improved health equity, and reduced health system costs.[3-9]

An essential enabler of primary care access is an adequate health human resource (HHR) supply, but many jurisdictions are grappling with current and impending shortages. For example, 14.5% (4.6 million) Canadians are without a primary care provider.[10] Virtually every country worldwide is experiencing population aging,[11] with a high burden of medical complexity[12-15] and a HHR workforce that is aging into retirement.[16-18] Concurrently, many countries, including Canada, the United Kingdom, and the United States, are experiencing challenges attracting incoming physicians to primary care as a specialty,[19-22] and among those who do, a declining proportion are providing primary care reflective of Starfield’s “4 Cs” (hereafter referred to as “comprehensive primary care”); instead, primary care physicians are increasingly limiting their scope of work to subspecialized areas such as sports medicine, dermatology, or palliative care, or to episodic acute care settings, such as walk-in clinics.[23-29] Moreover, the concentration of women in primary care may further reduce HHR capacity, as women primary care physicians have been found to spend more time with patients[30] and receive more patient requests outside of appointments than men.[31, 32]

1  
2  
3 In the context of an aging population and shifting workforce demographics, HHR planning  
4 requires an understanding of the needs of patients who will soon lose their primary care provider  
5 due to retirement. To anticipate future need, previous studies often use high-level supply  
6 indicators such as number of primary care physicians, and high-level demand indicators such as  
7 patient visit rates and durations.[33-36] In-depth analyses tend to be limited to sub-jurisdictional  
8 populations, such as the neighborhood[36] or early career clinicians,[24] and do not directly link  
9 supply (individual clinicians) to demand (patients served by those clinicians).  
10  
11  
12  
13  
14  
15  
16  
17  
18  
19

20 We conducted an in-depth exploration linking supply and demand at a health system planning  
21 level in Ontario, Canada. We examined temporal trends in near-retirement primary care  
22 physician characteristics and the medical and social needs of patients attached to these  
23 physicians. We also examined early career and mid-career physician characteristics over time to  
24 understand this segment of the workforce's capacity to absorb the patients of near-retirement  
25 physicians. We explored hypothesis-generating differences in gender-based workforce trends,  
26 including differences in care provision,[30, 31] and trends around alternative practice models,  
27 such as interprofessional team-based care. As Canadian healthcare planning and delivery are  
28 within provincial jurisdiction, we focused on the province-level (Ontario). In Ontario, most  
29 comprehensive primary care is delivered by family physicians (FPs), most physician services and  
30 all permanent residents are covered by government insurance, and health services data are stored  
31 centrally in health administrative datasets.  
32  
33  
34  
35  
36  
37  
38  
39  
40  
41  
42  
43  
44  
45  
46  
47

## 48 **METHODS**

49

50  
51 The use of data in this study was authorized under section 45 of Ontario's Personal Health  
52 Information Protection Act (PHIPA) and did not require review by a research ethics board or  
53  
54  
55  
56  
57  
58  
59  
60

1  
2  
3 informed consent. This study is reported following the Strengthening the Reporting of  
4  
5 Observational Studies in Epidemiology (STROBE) reporting guideline.[37]  
6  
7

### 8 **Study Design, Population, and Data Sources**

9

10  
11 We conducted a serial cross-sectional population-level analysis. De-identified physician-level  
12  
13 and patient-level data came from nine databases which were linked using unique encoded  
14  
15 identifiers and analyzed at ICES (Supplemental eMethods). The study population included all  
16  
17 registered Ontario residents covered by the Ontario Health Insurance Plan (OHIP) at three time  
18  
19 points: March 31, 2008 (12,936,360), March 31, 2013 (13,447,365), and March 31, 2019  
20  
21 (14,388,566) and all Ontario physicians who billed primary care services (2008: 11,566; 2013:  
22  
23 12,693; 2019: 15,054).  
24  
25  
26  
27

### 28 **Outcomes and Covariates**

29

30  
31 The primary outcomes were the number, proportion, and characteristics of patients attached to a  
32  
33 near-retirement age comprehensive FP over three time points, and the number, proportion, and  
34  
35 characteristics of near-retirement age comprehensive FPs over three time points. Physician  
36  
37 characteristics served as exploratory indicators of both existing supply and, for near-retirement  
38  
39 physicians, anticipated demand based on the populations of patients they serve. Patient  
40  
41 characteristics served as indicators of demand based on medical and sociodemographic  
42  
43 complexity.  
44  
45  
46  
47

48 Based on previous literature finding the average Ontario FP retires at age 70.5 years (with  
49  
50 women retiring on average 5 years earlier than men)[38] and accounting for the time needed to  
51  
52 train new physicians,[39] three different “near-retirement” physician age cut-points were  
53  
54 examined:  $\geq 55$  years,  $\geq 65$  years, and  $\geq 70$  years.  
55  
56  
57  
58  
59  
60

1  
2  
3 Comprehensive FPs were defined by applying a previously validated algorithm described below  
4  
5 in the Analysis section.[29] Detailed data source, cohort, and covariate definitions can be found  
6  
7 in the Supplemental eMethods.  
8  
9

## 10 **Analysis**

11  
12  
13 For our patient cohort, we created cross-sections of patients attached to comprehensive FPs at  
14  
15 three time points: 2008, 2013, 2019.  
16  
17

18  
19 We began by applying our previously validated algorithm for primary care physician  
20  
21 attachment[40] to the population of OHIP-registered Ontario residents; identifying patients  
22  
23 attached to a physician providing longitudinal primary care services based on billing codes and  
24  
25 physician-level continuity of care (see Supplemental eMethods – continuity of care). We  
26  
27 removed patients seen at Community Health Centres because they cannot be attached to a  
28  
29 specific physician, patients that the algorithm attached to non-FPs such as pediatricians and  
30  
31 surgeons, and patients attached to a FP with missing covariates.  
32  
33  
34

35  
36 We next created the cohort of FPs linked to the attached patients we identified (2008, 2013,  
37  
38 2019). We stratified our patient and FP cohorts by physician practice type (scope). For this, we  
39  
40 used a previously published algorithm for determining comprehensiveness of primary care  
41  
42 practice, where physicians are identified as providing comprehensive care if more than half of  
43  
44 their services were for core primary care and if these services fell into at least 7 of 22 activity  
45  
46 areas.[29] This resulted in four groups of patients with attachments to four types of FP practice  
47  
48 scopes: Comprehensive, Focused (for example, sports medicine or palliative care), Other, and  
49  
50 those who worked less than 44 days/year. The latter two practice categories were grouped  
51  
52  
53  
54  
55  
56  
57  
58  
59  
60

1  
2  
3 together as “Other”. Focusing on the “comprehensive FP” group, we described the characteristics  
4  
5 of these physicians and their patients.  
6  
7

8 Physician analyses were stratified by physician sex and physician age, including the three “near-  
9  
10 retirement” cut-points. Proportions and means with standard deviations were reported for each  
11  
12 time point (2008, 2013, 2019).  
13  
14  
15

### 16 **Patient and public involvement**

17  
18  
19 None.  
20  
21

## 22 **RESULTS**

### 23 **Patient Cohort**

24  
25  
26  
27  
28 Excluding long-term care home residents, the population of OHIP-eligible Ontario residents in  
29  
30 the patient cohort over time was 12,863,036 (2008), 13,371,946 (2013), and 14,312,309 (2019),  
31  
32 of whom the following were attached to a comprehensive FP: 2008: n = 9,537,353 (77.3%);  
33  
34 2013: n = 10,398,003 (85.1%); 2019: n = 11,480,975 (86.1%) (Figure 1a).  
35  
36  
37

### 38 **Physician Cohort**

39  
40  
41 The overall FP workforce grew from 9,944 physicians in 2008 to 13,269 in 2019 (Figure 1b, sum  
42  
43 of boxes 8 and 9).  
44  
45

46 Supplemental eTable 1 stratifies comprehensive FP data by age and sex. Career stage (years in  
47  
48 practice) closely followed physician age group for both males and females, and the youngest  
49  
50 cohort (age <35) comprised an increasing proportion of the workforce over time, shifting from  
51  
52 7.7% in 2008 to 15.1% in 2019. The older cohorts were also found to comprise an increasing  
53  
54 proportion of the workforce over time, and the absolute numbers of older physicians increased.  
55  
56  
57  
58  
59  
60



1  
2  
3 A shift away from comprehensiveness and into other/focused scopes of practice was seen, with  
4 the proportion of FPs practicing comprehensive primary care declining from 77.2% in 2008 (n =  
5 7,673) to 70.7% in 2019 (n = 9,377) (Supplemental eFigure 1). This was driven by mid-career  
6 and near-retirement physician groups (age groups 45 and above) shifting away from  
7 comprehensiveness. Over time, the proportion of younger physicians (those under 45) practicing  
8 in focused or other scopes of practice remained stable, albeit in higher proportions than their  
9 mid-career counterparts. In the oldest age group, a large and increasing proportion practice in  
10 focused/other types of practice (Supplemental eTable 2).  
11  
12  
13  
14  
15  
16  
17  
18  
19  
20  
21

### 22 **Temporal Trends of Near-Retirement Comprehensive Family Physicians and their Patients**

23  
24  
25 When looking at our three near-retirement cut-points (55+, 65+, 70+) over time, an increasing  
26 proportion of the comprehensive FP workforce was near retirement age (Figure 2).  
27

28  
29 Correspondingly, an increasing proportion of patients were attached to near-retirement  
30 comprehensive FPs (Table 1). In the 55+ age group, the proportion of comprehensive FPs  
31 increased from 35.7% in 2008 to 38.2% in 2019. In 2019, this corresponded to 3,586 physicians  
32 and 4,935,992 (43.0%) patients (2019). In the 65+ group, the proportion increased from 10.0% in  
33 2008 to 13.9% in 2019 (1,307 physicians, 1,695,126 (14.8%) patients). In the 70+ age group, the  
34 proportion increased from 4.6% in 2008 to 6.4% in 2019 (599 physicians, 666,000 (5.8%)  
35 patients).  
36  
37  
38  
39  
40  
41  
42  
43  
44  
45  
46  
47  
48  
49  
50  
51  
52  
53  
54  
55  
56  
57  
58  
59  
60

**Table 1. Characteristics of patients attached to near-retirement comprehensive family physicians over time, by near-retirement group**

| Patient Characteristics                                                                                               |      | Age 55+ Comprehensive FPs |      | Age 65+ Comprehensive FPs |      | Age 70+ Comprehensive FPs |      |
|-----------------------------------------------------------------------------------------------------------------------|------|---------------------------|------|---------------------------|------|---------------------------|------|
|                                                                                                                       |      | N                         | %    | N                         | %    | N                         | %    |
| <b>OVERALL</b><br>(N, % of patients attached to near-retirement physician group)                                      | 2008 | 3,571,661                 | 37.5 | 690,642                   | 7.2  | 214,861                   | 2.3  |
|                                                                                                                       | 2013 | 4,676,625                 | 45.0 | 1,399,119                 | 13.5 | 419,172                   | 4.0  |
|                                                                                                                       | 2019 | 4,935,992                 | 43.0 | 1,695,126                 | 14.8 | 666,404                   | 5.8  |
| <b>Aged 65+</b><br>(N, % of patients attached to near-retirement physician group)                                     | 2008 | 597,707                   | 16.7 | 136,394                   | 19.8 | 45,414                    | 21.1 |
|                                                                                                                       | 2013 | 846,974                   | 18.1 | 298,545                   | 21.3 | 95,833                    | 22.8 |
|                                                                                                                       | 2019 | 1,003,769                 | 20.3 | 402,430                   | 23.7 | 176,473                   | 26.5 |
| <b>Female patients</b><br>(N, % of patients attached to near-retirement physician group)                              | 2008 | 1,804,585                 | 50.5 | 338,656                   | 49.0 | 103,386                   | 48.1 |
|                                                                                                                       | 2013 | 2,371,923                 | 50.7 | 678,971                   | 48.5 | 201,104                   | 48.0 |
|                                                                                                                       | 2019 | 2,498,453                 | 50.6 | 823,090                   | 48.6 | 317,967                   | 47.7 |
| <b>Rural patients (RIO score 40+)</b><br>(N, % of patients attached to near-retirement physician group)               | 2008 | 233,045                   | 6.5  | 48,860                    | 7.1  | 14,323                    | 6.7  |
|                                                                                                                       | 2013 | 292,357                   | 6.3  | 88,311                    | 6.3  | 20,294                    | 4.8  |
|                                                                                                                       | 2019 | 274,099                   | 5.6  | 83,691                    | 4.9  | 33,545                    | 5.0  |
| <b>Highest (4+) RUB</b><br>(N, % of patients attached to near-retirement physician group)                             | 2008 | 677,436                   | 19.0 | 137,995                   | 20.0 | 44,067                    | 20.5 |
|                                                                                                                       | 2013 | 878,340                   | 18.8 | 283,013                   | 20.2 | 88,182                    | 21.0 |
|                                                                                                                       | 2019 | 983,818                   | 19.9 | 350,439                   | 20.7 | 146,298                   | 22.0 |
| <b>Highest (5+) annual core primary care visits</b><br>(N, % of patients attached to near-retirement physician group) | 2008 | 2,109,950                 | 59.1 | 403,026                   | 58.4 | 127,050                   | 59.1 |
|                                                                                                                       | 2013 | 2,462,236                 | 52.7 | 753,388                   | 53.9 | 227,090                   | 54.2 |
|                                                                                                                       | 2019 | 2,480,395                 | 50.3 | 876,487                   | 51.7 | 346,668                   | 52.0 |
| <b>COPD</b><br>(N, % of patients attached to near-retirement physician group)                                         | 2008 | 233,498                   | 6.5  | 51,856                    | 7.5  | 16,411                    | 7.6  |
|                                                                                                                       | 2013 | 326,748                   | 7.0  | 115,669                   | 8.3  | 37,477                    | 8.9  |
|                                                                                                                       | 2019 | 337,202                   | 6.8  | 132,395                   | 7.8  | 59,350                    | 8.9  |
| <b>CHF</b><br>(N, % of patients attached to near-retirement physician group)                                          | 2008 | 69,573                    | 2.0  | 15,645                    | 2.3  | 4,952                     | 2.3  |
|                                                                                                                       | 2013 | 80,026                    | 1.7  | 28,187                    | 2.0  | 9,214                     | 2.2  |
|                                                                                                                       | 2019 | 90,436                    | 1.8  | 35,567                    | 2.1  | 15,832                    | 2.4  |
| <b>Diabetes</b><br>(N, % of patients attached to near-retirement physician group)                                     | 2008 | 327,127                   | 9.2  | 68,392                    | 9.9  | 21,389                    | 10.0 |
|                                                                                                                       | 2013 | 506,014                   | 10.8 | 170,115                   | 12.2 | 52,815                    | 12.5 |
|                                                                                                                       | 2019 | 555,358                   | 11.3 | 215,696                   | 12.7 | 92,395                    | 13.9 |

|                                                                                                                                    |      |           |      |         |      |         |      |
|------------------------------------------------------------------------------------------------------------------------------------|------|-----------|------|---------|------|---------|------|
| <b>Frailty</b><br><b>(N, % of patients attached to near-retirement physician group)</b>                                            | 2008 | 66,559    | 1.9  | 14,875  | 2.2  | 4,964   | 2.3  |
|                                                                                                                                    | 2013 | 98,490    | 2.1  | 33,005  | 2.4  | 10,794  | 2.6  |
|                                                                                                                                    | 2019 | 114,085   | 2.3  | 43,032  | 2.5  | 18,597  | 2.8  |
| <b>Any mental health illness in last 2 years</b><br><b>(N, % of patients attached to near-retirement physician group)</b>          | 2008 | 825,520   | 23.1 | 166,257 | 24.1 | 51,802  | 24.1 |
|                                                                                                                                    | 2013 | 979,987   | 21.0 | 311,771 | 22.3 | 96,543  | 23.0 |
|                                                                                                                                    | 2019 | 1,022,523 | 20.7 | 355,911 | 21.0 | 150,153 | 22.5 |
| <b>Lowest income quintile</b><br><b>(N, % of patients attached to near-retirement physician group)</b>                             | 2008 | 706,504   | 19.8 | 150,381 | 21.8 | 48,403  | 22.5 |
|                                                                                                                                    | 2013 | 876,982   | 18.8 | 282,922 | 20.2 | 91,236  | 21.8 |
|                                                                                                                                    | 2019 | 944,888   | 19.1 | 348,869 | 20.6 | 142,881 | 21.4 |
| <b>Highest housing instability quintile</b><br><b>(N, % of patients attached to near-retirement physician group)</b>               | 2008 | 761,397   | 21.3 | 165,525 | 24.0 | 54,275  | 25.6 |
|                                                                                                                                    | 2013 | 934,472   | 20.0 | 295,059 | 21.1 | 92,653  | 22.2 |
|                                                                                                                                    | 2019 | 1,031,506 | 20.9 | 374,322 | 22.1 | 155,859 | 23.4 |
| <b>Highest material deprivation quintile</b><br><b>(N, % of patients attached to near-retirement physician group)</b>              | 2008 | 736,903   | 20.6 | 163,835 | 23.7 | 52,733  | 24.9 |
|                                                                                                                                    | 2013 | 1,045,136 | 22.4 | 338,012 | 24.2 | 112,097 | 26.9 |
|                                                                                                                                    | 2019 | 926,043   | 18.8 | 352,849 | 20.8 | 145,084 | 21.8 |
| <b>Highest neighborhood ethnic concentration quintile</b><br><b>(N, % of patients attached to near-retirement physician group)</b> | 2008 | 962,252   | 26.9 | 177,586 | 25.7 | 63,167  | 29.8 |
|                                                                                                                                    | 2013 | 1,335,124 | 28.6 | 397,430 | 28.4 | 124,062 | 29.8 |
|                                                                                                                                    | 2019 | 1,521,975 | 30.8 | 584,512 | 34.5 | 213,182 | 32.0 |
| <b>Recent immigrant</b><br><b>(N, % of patients attached to near-retirement physician group)</b>                                   | 2008 | 269,131   | 7.5  | 52,717  | 7.6  | 21,202  | 10.9 |
|                                                                                                                                    | 2013 | 289,772   | 6.2  | 83,484  | 6.0  | 27,024  | 7.0  |
|                                                                                                                                    | 2019 | 277,755   | 5.6  | 82,560  | 4.9  | 28,449  | 4.3  |

Interpretation of Table 1 rows:

Interpretation of the "Overall" category: For example, in 2019, 1,695,126 patients were attached to a comprehensive FP aged 65+. This represents 14.8% of all patients who are attached to a comprehensive FP.

Interpretation of each patient category: For example, in 2019, of the 666,404 patients attached to comprehensive FPs over the age of 70 years, 28,449 (4.3%) were recent immigrants

FPs: Family physicians

RIO: Rural Index of Ontario

RUB: Morbidity, based on Resource Utilization Band

COPD: Chronic obstructive pulmonary disease

CHF: Congestive heart failure

## Temporal Characteristics of Comprehensive Family Physicians and their Patients

### *Comprehensive FP Capacity/Workload*

Supplemental eTable 1 shows the mean (SD) roster size for the total population of comprehensive FPs remained consistent over time (2008: 1213 (927); 2013: 1272 (909); 2019: 1209 (837)). Male FPs had consistently larger roster sizes in each age group and at each time point. Both male and female FP roster sizes followed an inverted U pattern with FP age, with practice sizes starting and ending smaller at the extremes of FP age and peaking during mid-career. This pattern was observed at all three time points. That said, male and female older (65+) physicians and younger (<35) physicians cared for larger roster sizes over time.

Working full time equivalent (FTE) also followed an inverted U pattern according to FP age (Supplemental eTable 1). Consistently, two thirds of the overall comprehensive FP workforce practiced FTE, with males comprising the majority of FTE physicians. Older physicians increasingly practiced FTE (age 65-69, 2008: 58.4%, 2013: 67.0%, 2019: 72.6%; age 70+, 2008: 32.0%, 2013: 41.6%, 2019: 54.6%), a trend that was driven by an increasing proportion of female FTE comprehensive FPs. Among younger physicians, by 2019, females comprised the majority of FTE workforce (52.2% of FTE comprehensive FPs <35 years; 55.2% of FTE comprehensive FPs 35-44 years).

Mean (SD) annual core primary care visits provided per patient declined over time (Supplemental eTable 1): 2008: 7.3 (3.1) visits; 2013: 6.5 (2.6) visits; 2019: 6.0 (2.3) visits. In most comprehensive FP age groups, male and females provided similar numbers of annual visits. Older physicians provided more annual visits compared with their younger counterparts.

1  
2  
3 In the patient cohort (Table 1), at all near-retirement physician cut-offs (55+, 65+, 70+), a  
4 declining proportion over time made a high number (5+) primary care visits in the preceding  
5 year, but these proportions remained consistently over 50% in all near-retirement groups and at  
6 each time point.  
7  
8  
9  
10  
11  
12

### 13 ***Comprehensive FP Practice Settings***

14  
15  
16 A declining proportion of comprehensive FPs over time practiced in fee-for-service (FFS)  
17 models of care, with alternate payment plan models (APPs), specifically capitation and team-  
18 based models of care, becoming increasingly common (Supplemental eFigure 2). In these APP  
19 models, physician compensation is primarily a lump sum payment per attached patient, with or  
20 without additional government funding for support for interdisciplinary health professionals  
21 (“teams”) such as nurses, nurse practitioners, social workers, and dietitians. In 2008, most  
22 comprehensive FPs worked in FFS-based models (76.6%), but by 2019, most practiced in APPs  
23 (55.4%) (Supplemental eFigure 2, Supplemental eTable 3). Correspondingly, an increasing  
24 proportion of patients were served in APP models: 2008: 26.5% (n = 2,526,116); 2013: 54.3% (n  
25 = 5,643,862); 2019: 61.5% (n = 7,064,109).  
26  
27  
28  
29  
30  
31  
32  
33  
34  
35  
36  
37  
38  
39

40 Over time, a stable majority of comprehensive FPs practiced in large urban and urban settings  
41 (Supplemental eTable 4A). Trends around age and sex of rural comprehensive FPs resembled  
42 trends seen in the overall comprehensive FP population (Supplemental eTables 4B, 4C).  
43  
44  
45  
46

### 47 ***Patient complexity***

48  
49  
50 The mean age (SD) of comprehensive FPs’ patients increased over time (Supplemental eTable  
51 1): 2008: 33.5 (13.2) years; 2013: 36.5 (12.1) years; 2019: 38.1 (12.0) years. When stratified by  
52 physician age and sex, each physician age group served increasingly older patients. Male  
53  
54  
55  
56  
57  
58  
59  
60

1  
2  
3 physicians cared for slightly older patients than did females in each physician age group and at  
4 each time point.  
5  
6

7  
8 The number and proportion of patients aged 65 and older increased over time in each near-  
9 retirement group (Table 1). This number nearly quadrupled in the oldest (70+ years) FP group  
10 (2008: N = 45,414, 2019: N = 176,473).  
11  
12  
13  
14

15  
16 Over time, an increasing proportion of comprehensive FPs' practices were comprised of the  
17 highest morbidity patients (Resource Utilization Band (RUB) 4+): 2008: 16.5%; 2013: 18.1%;  
18 2019: 19.8% (Supplemental eTable 5). Concordantly, as seen in Table 1, the number and  
19 proportion of highest morbidity patients attached to near-retirement physicians grew over time.  
20  
21 By 2019, 983,818 patients in the highest morbidity category were attached to a physician aged  
22 55+, representing 19.9% of all patients attached to a 55+ physician. 350,439 were attached to a  
23 65+ physician (20.7% of patients attached to a 65+ physician). 146,298 were attached to a 70+  
24 physician (22.0% of patients attached to 70+ a physician), representing a tripling of the absolute  
25 number.  
26  
27  
28  
29  
30  
31  
32  
33  
34  
35  
36

37 While proportions of patients with chronic illness (COPD, CHF, diabetes, frailty, mental illness)  
38 remained relatively stable over time, the absolute numbers increased markedly in each near-  
39 retirement group (Table 1).  
40  
41  
42  
43  
44

45 The proportions and means of socially complex patients cared for within each comprehensive FP  
46 age and sex group increased over time for most indicators (Supplemental eTable 5) and,  
47 concordantly, the number of higher social complexity patients increased markedly over time for  
48 most near-retirement groups (Table 1).  
49  
50  
51  
52  
53

## 54 **DISCUSSION**

55  
56  
57  
58  
59  
60

1  
2  
3 In our population-level serial cross-sectional analyses, the proportion of patients attached to a  
4 comprehensive FP in Ontario, Canada, grew over time. However, reflective of population-level  
5 workforce trends,[16] we found an increasing proportion of the comprehensive FP workforce is  
6 nearing retirement. Given the average FP retires at age 70.5 years,[38] we anticipate that  
7  
8 between 2019 and 2025, nearly 1.7 million Ontarians may lose their comprehensive FP to  
9 retirement, eroding gains in primary care attachment made to date.[41]

10  
11 This number may be an underestimate for several reasons. First, half of all comprehensive FPs  
12 are now female, and female FPs retire on average 5 years earlier than males.[38] Second, and  
13 aligned with previous research,[29] a declining proportion of FPs are practicing comprehensive  
14 family medicine. Third, only two thirds of comprehensive FPs are practicing full-time. Fourth,  
15 due to limitations in data availability for more recent years, our analyses predate the COVID-19  
16 pandemic, and surveys from Ontario indicate the pandemic has hastened retirement plans, with  
17 almost double the usual proportion of FPs closing their offices during the pandemic (3%,  
18 compared with the usual rate of 1.6%/year),[42] and one in five indicating an intention to retire  
19 within five years.[43]

20  
21 Several other trends we identified likely apply to other jurisdictions nationally and  
22 internationally and, when taken together, indicate limited capacity in the existing workforce to  
23 absorb the workload of near-retirement physicians. Reflective of a generally aging population,  
24 comprehensive FPs cared for increasingly older groups of patients with increasing medical and  
25 social complexity over time. Females, who comprised an increasing proportion of the  
26 comprehensive FP workforce, served smaller roster sizes than males, which may reflect that a  
27 lower proportion of female physicians practiced FTE compared with males. Hypotheses based on  
28 previous research include that women primary care physicians may spend more time with  
29  
30  
31  
32  
33  
34  
35  
36  
37  
38  
39  
40  
41  
42  
43  
44  
45  
46  
47  
48  
49  
50  
51  
52  
53  
54  
55  
56  
57  
58  
59  
60

1  
2  
3 patients, receive more requests outside of appointments from patients, and carry the majority of  
4 household responsibilities, including child care.[31, 32, 44] Of note, however, both the oldest  
5 and youngest male and female comprehensive FP groups served increasingly larger rosters, and  
6 an increasing proportion of older (65+) physicians practiced FTE, suggesting a significant  
7 workload among near-retirement FPs and limited capacity among early career FPs to absorb that  
8 workload.  
9

10 Although modelling the incoming comprehensive FP workforce supply was outside of the scope  
11 of this study, data from other sources indicate concerning trends. While Ontario continues to add  
12 a net positive number of FPs to the workforce each year, this number has declined from 453 in  
13 2017 to 303 in 2020.[45] Over the past 7 years, a smaller proportion of medical school graduates  
14 ranked family medicine as their first choice discipline,[46] echoing trends in other jurisdictions  
15 including the United Kingdom and the United States.[20-22] Demand created by population  
16 growth continues, and Canada recently announced a plan to welcome 1.45 million new  
17 immigrants between 2023 and 2025.[47] While some newcomers may add to the health  
18 workforce supply, it is unclear if, proportionally, this will be sufficient to meet demand, and  
19 concerns persist around the slow and difficult credentialing process for internationally trained  
20 physicians.[48, 49] The future supply of incoming FPs may therefore be inadequate to meet the  
21 needs identified in our study, especially considering the practice trends we identified and the 1.6  
22 million Ontarians already without a regular source of primary care in our 2019 cohort.  
23  
24

25 Solutions to FP workforce shortages identified in the literature focus on addressing deterrents to  
26 the practice of comprehensive primary care, including perceived poor respect for primary care as  
27 a profession, inadequate compensation, inadequate training supports for developing and  
28 maintaining comprehensive skills, and inadequate administrative and interprofessional health  
29  
30  
31  
32  
33  
34  
35  
36  
37  
38  
39  
40  
41  
42  
43  
44  
45  
46  
47  
48  
49  
50  
51  
52  
53  
54  
55  
56  
57  
58  
59  
60



1  
2  
3 supports to manage increasing patient complexity.[21, 24, 50-54] Our finding of a shift toward  
4  
5 APP models underscores the desire among comprehensive FPs for financial stability and the  
6  
7 support of an interprofessional team. Further, we identified equity concerns that relate to the  
8  
9 large numbers of patients with chronic diseases and complex social needs, all of which are highly  
10  
11 amenable to team-based care.[55-57] Concerningly, as of 2019, we found that 47% of older  
12  
13 (65+) physicians still practiced in the less popular FFS models of care, serving 761,648 patients;  
14  
15 these FFS practices may be less desirable to incoming physicians looking to take over a retiring  
16  
17 physician's practice.  
18  
19  
20  
21

22 In some jurisdictions, the response to primary care workforce shortages has included expanding  
23  
24 the scope of practice for non-physician health professionals. For example, several provinces in  
25  
26 Canada, including Ontario, now allow pharmacists to prescribe for minor common ailments.  
27  
28 However, concerns have been raised around inadequate concurrent investments in  
29  
30 comprehensive, team-based primary care (rather than episodic, siloed care), the disruption of  
31  
32 continuity for those who do have primary care access, limited pharmacist training in clinical  
33  
34 diagnosis, and the lack of high-quality evidence around cost-effectiveness and health  
35  
36 outcomes.[58, 59] Both the U.S. and Canada have increased nurse practitioner- or physician  
37  
38 assistant-led primary care. However, a recent U.S. study found that primary care delivered by  
39  
40 non-physician practitioners was more costly than care delivered by physicians,[60] and accurate  
41  
42 cost comparisons in Canada remain a challenge due to the lack of publicly available data on non-  
43  
44 physician overhead spending.  
45  
46  
47  
48  
49

50 There are some limitations to our study. The FTE indicator is based on physician billings,  
51  
52 thereby excluding time spent on non-billable administrative work. Almost half of Canadian FPs  
53  
54 report 10-19 hours per week of administrative tasks,[61] so the indicator may underestimate  
55  
56  
57  
58  
59  
60

1  
2  
3 workload, and thus the number of FTE FPs. Rural FPs often practice in both primary care and  
4  
5 hospital settings;[62] since the comprehensiveness algorithm is based on primary care  
6  
7 billings,[29] it may underestimate the number of rural comprehensive FPs. Further, the rurality  
8  
9 index scores and methodology have not been updated since 2008 despite the significant  
10  
11 population growth and municipal-level changes that have occurred since then. Some physician  
12  
13 analyses could not be fully stratified by both age and sex due to small cell sizes. Community  
14  
15 Health Centre patients are not included and we did not examine other clinicians who may  
16  
17 provide primary care; however, these clinicians are the main primary care source for only a small  
18  
19 minority (approximately 1%) of Ontarians.[63, 64] Finally, our analyses do not account for the  
20  
21 rise of virtual care and its potential impact on capacity.[65-67]  
22  
23  
24  
25  
26

## 27 **CONCLUSIONS**

28  
29  
30 Primary care faces many capacity challenges as physicians age into retirement and fewer choose  
31  
32 to enter or remain in comprehensive practice. Incentives and supports are needed to grow the  
33  
34 comprehensive FP workforce to serve a growing and increasingly complex patient population.  
35  
36  
37  
38  
39  
40  
41  
42  
43  
44  
45  
46  
47  
48  
49  
50  
51  
52  
53  
54  
55  
56  
57  
58  
59  
60

## CONTRIBUTORS

Kamila Premji, Michael E Green, Richard H Glazier, and Bridget L Ryan conceived the study concept and design. Kamila Premji, Michael E Green, Richard H Glazier, Shahriar Khan, Susan E Schultz, Maria Mathews, Steve Nastos, Eliot Frymore, and Bridget L Ryan participated in the acquisition and interpretation of data. Kamila Premji, Shahriar Khan, Bridget L Ryan, Michael E Green, and Richard H Glazier contributed to the statistical analysis of the acquired data. Kamila Premji drafted the manuscript. All authors critically revised the contents of the manuscript, approved the final version to be submitted for publication, and agreed to be accountable for all aspects of the work with respect to its accuracy and integrity. Michael E Green and Richard H Glazier obtained funding to support this research. Eliot Frymire and Shahriar Khan provided administrative and technical support. Bridget L Ryan and Maria Mathews provided supervision for this project.

## ACKNOWLEDGEMENTS

We would like to acknowledge Monisha Kabir for her assistance in preparing the final submission.

**Conflict of Interest Disclosures:** None declared.

**Funding/Support:** This study was supported by the INSPIRE PHC (Innovations Strengthening Primary Health Care Through Research) Research Program (#693), which is funded through the Health Systems Research Program of the Ontario Ministry of Health (MOH) and the Ontario Ministry of Long-term Care (MLTC). It was also supported by ICES, which is funded by an annual grant from the Ontario MOH and MLTC. Dr. Premji was also supported by the PhD Family Medicine program at the University of Western Ontario, and by the Junior Clinical

1  
2  
3 Research Chair in Family Medicine at the Department of Family Medicine, University of  
4  
5 Ottawa.  
6  
7

8 **Role of the Funder/Sponsor:** The funders and supporters had no role in the design and conduct  
9  
10 of the study; collection, management, analysis, and interpretation of the data; preparation,  
11  
12 review, or approval of the manuscript; and decision to submit the manuscript for publication.  
13  
14

15  
16 **Disclaimer:** The analyses, conclusions, opinions, and statements expressed herein are solely  
17  
18 those of the authors and do not reflect those of the funding or data sources; no endorsement is  
19  
20 intended or should be inferred.  
21  
22

23  
24 **Additional Information:** Parts of this material are based on data and/or information compiled  
25  
26 and provided by CIHI and Cancer Care Ontario (CCO). The analyses, conclusions, opinions and  
27  
28 statements expressed herein are solely those of the authors and do not reflect those of the data  
29  
30 sources; no endorsement is intended or should be inferred.  
31  
32

33  
34 **Data availability statement:** The data sets from this study are held securely in coded form at  
35  
36 ICES. Data-sharing agreements prohibit ICES from making the data sets publicly available, but  
37  
38 access may be granted to those who meet pre-specified criteria for confidential access, available  
39  
40 at [www.ices.on.ca/DAS](http://www.ices.on.ca/DAS). The complete data set creation plan, and underlying analytic code are  
41  
42 available from the authors upon request, understanding that the programs may rely upon coding  
43  
44 templates or macros unique to ICES.  
45  
46  
47  
48  
49  
50  
51  
52  
53  
54  
55  
56  
57  
58  
59  
60

## REFERENCES

1. Starfield B, Shi L, Macinko J. Contribution of primary care to health systems and health. *Milbank Q* 2005;83(3):457-502. doi: 10.1111/j.1468-0009.2005.00409.x
2. O'Malley AS, Rich EC, Maccarone A, et al. Disentangling the Linkage of Primary Care Features to Patient Outcomes: A Review of Current Literature, Data Sources, and Measurement Needs. *J Gen Intern Med* 2015;30(Suppl 3):S576-85. doi: 10.1007/s11606-015-3311-9
3. Basu S, Berkowitz SA, Phillips RL, et al. Association of Primary Care Physician Supply With Population Mortality in the United States, 2005-2015. *JAMA Intern Med* 2019;179(4):506-14. doi: 10.1001/jamainternmed.2018.7624
4. Bazemore A, Petterson S, Peterson LE, et al. Higher Primary Care Physician Continuity is Associated With Lower Costs and Hospitalizations. *Ann Fam Med* 2018;16(6):492-7. doi: 10.1370/afm.2308
5. McAlister FA, Bakal JA, Green L, et al. The effect of provider affiliation with a primary care network on emergency department visits and hospital admissions. *CMAJ* 2018;190(10):E276-E84. doi: 10.1503/cmaj.170385
6. Pereira Gray DJ, Sidaway-Lee K, White E, et al. Continuity of care with doctors-a matter of life and death? A systematic review of continuity of care and mortality. *BMJ Open* 2018;8(6):e021161. doi: 10.1136/bmjopen-2017-021161
7. OECD. OECD Health Policy Studies: Realising the Potential of Primary Health Care. OECD Publishing; 2020.
8. National Health Service (NHS) England. Next steps on the NHS Five Year Forward View: Primary Care [online]. 2017. <https://www.england.nhs.uk/five-year-forward-view/next-steps-on-the-nhs-five-year-forward-view/primary-care/> (accessed March 3, 2023).
9. Vallejo-Torres L, Morris S. Primary care supply and quality of care in England. *Eur J Health Econ* 2018;19(4):499-519. doi: 10.1007/s10198-017-0898-2
10. Statistics Canada. Primary Health Care Providers, 2019 [online]. 2020. <https://www150.statcan.gc.ca/n1/pub/82-625-x/2020001/article/00004-eng.pdf> (accessed March 3, 2023).
11. United Nations Department of Economic and Social Affairs Population Division. World Population Ageing 2019: Highlights [online]. 2019. <https://www.un.org/development/desa/pd/sites/www.un.org.development.desa.pd/files/files/documents/20/Jan/worldpopulationageing2019-highlights.pdf> (accessed March 9, 2023).
12. Kudesia P, Salimrouny B, Stanley M, et al. The incidence of multimorbidity and patterns in accumulation of chronic conditions: A systematic review. *J Multimorb Comorb* 2021;11:26335565211032880. doi: 10.1177/26335565211032880
13. Ryan BL, Allen B, Zwarenstein M, et al. Multimorbidity and mortality in Ontario, Canada: A population-based retrospective cohort study. *J Comorb* 2020;10:2235042X20950598. doi: 10.1177/2235042X20950598
14. Rosella L, Kornas K, Huang A, et al. Accumulation Of Chronic Conditions At The Time Of Death Increased In Ontario From 1994 To 2013. *Health Aff* 2018;37(3):464-72. doi: 10.1377/hlthaff.2017.1150
15. Koné Pefoyo AJ, Bronskill SE, Gruneir A, et al. The increasing burden and complexity of multimorbidity. *BMC Public Health* 2015;15:415. doi: 10.1186/s12889-015-1733-2
16. Statistics Canada. In the Midst of High Job Vacancies and Historically Low Unemployment, Canada Faces Record Retirements from an Aging Labour Force [online]. 2022. <https://www150.statcan.gc.ca/n1/daily-quotidien/220427/dq220427a-eng.pdf> (accessed March 9, 2023).
17. Cristea M, Noja GG, Stefea P, et al. The Impact of Population Aging and Public Health Support on EU Labor Markets. *Int J Environ Res Public Health* 2020;17(4). doi: 10.3390/ijerph17041439
18. Willis J, Antono B, Bazemore A, et al. The State of Primary Care in the United States: A Chartbook of Facts and Statistics [online]. 2020. <https://www.graham->

- [center.org/content/dam/rgc/documents/publications-reports/reports/PrimaryCareChartbook2021.pdf](https://www.bmj.com/content/dam/rgc/documents/publications-reports/reports/PrimaryCareChartbook2021.pdf) (accessed August 24, 2023).
19. Canadian Resident Matching Service (CaRMS). CaRMS R-1 Data and Reports. R-1 Match Reports [online]. 2022. <https://www.carms.ca/data-reports/r1-data-reports/> (accessed August 24, 2022).
  20. The American Academy of Family Physicians. 2022 Match Results for Family Medicine [online]. 2022. [https://www.aafp.org/content/dam/AAFP/documents/medical\\_education\\_residency/the\\_match/AAFP-2022-Match-Results-for-Family-Medicine.pdf](https://www.aafp.org/content/dam/AAFP/documents/medical_education_residency/the_match/AAFP-2022-Match-Results-for-Family-Medicine.pdf) (accessed August 24, 2022).
  21. Alberti H, Banner K, Collingwood H, et al. 'Just a GP': a mixed method study of undermining of general practice as a career choice in the UK. *BMJ Open* 2017;7(11):e018520. doi: 10.1136/bmjopen-2017-018520
  22. Lambert TW, Smith F, Goldacre MJ. Trends in attractiveness of general practice as a career: surveys of views of UK-trained doctors. *Br J Gen Pract* 2017;67(657):e238-e47. doi: 10.3399/bjgp17X689893
  23. Freeman TR, Boisvert L, Wong E, et al. Comprehensive practice: Normative definition across 3 generations of alumni from a single family practice program, 1985 to 2012. *Can Fam Physician* 2018;64(10):750-9.
  24. Kabir M, Randall E, Mitra G, et al. Resident and early-career family physicians' focused practice choices in Canada: a qualitative study. *Br J Gen Pract* 2022;72(718):e334-e41. doi: 10.3399/BJGP.2021.0512
  25. Lavergne MR, Scott I. The "kids" are alright: Practice patterns among early career family physicians and implications for primary care policy and workforce planning. Department of Family Medicine Rounds; University of British Columbia, BC, Canada: Department of Family Medicine, University of British Columbia; 2022.
  26. Reitz R, Horst K, Davenport M, et al. Factors Influencing Family Physician Scope of Practice: A Grounded Theory Study. *Fam Med* 2018;50(4):269-74. doi: 10.22454/FamMed.2018.602663
  27. Chan BTB. The declining comprehensiveness of primary care. *CMAJ* 2002;166(4):429-34.
  28. Coutinho AJ, Cochrane A, Stelter K, et al. Comparison of intended scope of practice for family medicine residents with reported scope of practice among practicing family physicians. *JAMA* 2015;314(22):2364. doi: 10.1001/jama.2015.13734
  29. Schultz SE, Glazier RH. Identification of physicians providing comprehensive primary care in Ontario: a retrospective analysis using linked administrative data. *CMAJ Open* 2017;5(4):E856-E63. doi: 10.9778/cmajo.20170083
  30. Ganguli I, Sheridan B, Gray J, et al. Physician Work Hours and the Gender Pay Gap - Evidence from Primary Care. *N Engl J Med* 2020;383(14):1349-57. doi: 10.1056/NEJMsa2013804
  31. Rittenberg E, Liebman JB, Rexrode KM. Primary Care Physician Gender and Electronic Health Record Workload. *J Gen Intern Med* 2022;37(13):3295-301. doi: 10.1007/s11606-021-07298-z
  32. Pelley E, Carnes M. When a Specialty Becomes "Women's Work": Trends in and Implications of Specialty Gender Segregation in Medicine. *Academic Medicine* 2020;95(10):1499-506. doi: 10.1097/acm.0000000000003555
  33. Glied S, Ma S. How Will the Affordable Care Act Affect the Use of Health Care Services? Issue Briefs: The Commonwealth Fund; 2015. p. 1-15.
  34. Petterson SM, Liaw WR, Phillips RL, Jr., et al. Projecting US primary care physician workforce needs: 2010-2025. *Ann Fam Med* 2012;10(6):503-9. doi: 10.1370/afm.1431
  35. Rao A, Shi Z, Ray KN, et al. National Trends in Primary Care Visit Use and Practice Capabilities, 2008-2015. *Ann Fam Med* 2019;17(6):538-44. doi: 10.1370/afm.2474
  36. Bourgeault IL, Chamberland-Rowe C, Simkin S. Co-developing an integrated primary care workforce planning approach at a regional level: overarching framework and guiding principles. *Hum Resour Health* 2021;19(1):87. doi: 10.1186/s12960-021-00578-z



- 1  
2  
3 37. von Elm E, Altman DG, Egger M, et al. The Strengthening the Reporting of Observational  
4 Studies in Epidemiology (STROBE) Statement: guidelines for reporting observational studies. *Int J Surg*  
5 2014;12(12):1495-9. doi: 10.1016/j.ijsu.2014.07.013
- 6 38. Simkin S, Dahrouge S, Bourgeault IL. End-of-career practice patterns of primary care physicians  
7 in Ontario. *Can Fam Physician* 2019;65(5):e221-e30.
- 8 39. Working Group on Postgraduate Curriculum Review TCoFPoCC. Length of Training in the Core  
9 Family Medicine Residency. Mississauga, ON, Canada 2012.
- 10 40. Jaakkimainen L, Bayoumi I, Glazier RH, et al. Development and validation of an algorithm using  
11 health administrative data to define patient attachment to primary care providers. *J Health Organ Manag*  
12 2021;ahead-of-print(ahead-of-print):733-43. doi: 10.1108/JHOM-05-2020-0171
- 13 41. Bayoumi I, Glazier RH, Jaakkimainen L, et al. Trends in attachment to a primary care provider in  
14 Ontario, 2008-2018: an interrupted time-series analysis. *CMAJ Open* 2023;11(5):E809-e19. doi:  
15 10.9778/cmajo.20220167
- 16 42. Kiran T, Green ME, Wu CF, et al. Family Physicians Stopping Practice During the COVID-19  
17 Pandemic in Ontario, Canada. *Ann Fam Med* 2022;20(5):460-3. doi: 10.1370/afm.2865
- 18 43. Kiran T, Wang R, Handford C, et al. Keeping doors open: A cross-sectional survey of family  
19 physician practice patterns during COVID-19, needs, and intentions. *medRxiv*  
20 2021:2021.12.20.21267918. doi: 10.1101/2021.12.20.21267918
- 21 44. Jolly S, Griffith KA, DeCastro R, et al. Gender differences in time spent on parenting and  
22 domestic responsibilities by high-achieving young physician-researchers. *Ann Intern Med*  
23 2014;160(5):344-53. doi: 10.7326/M13-0974
- 24 45. Ontario Physician Reporting Centre. Physicians in Ontario [online]. 2022.  
25 <https://physicianreporting.org/pio/> (accessed August 31, 2022).
- 26 46. Canadian Resident Matching Service (CaRMS). R-1 data and reports: Discipline choice of  
27 Canadian applicants [online]. 2022. <https://www.carms.ca/data-reports/r1-data-reports/> (accessed  
28 September 1, 2022).
- 29 47. Immigration, Refugees and Citizenship Canada. Notice – Supplementary Information for the  
30 2023-2025 Immigration Levels Plan [online]. 2022. [https://www.canada.ca/en/immigration-refugees-](https://www.canada.ca/en/immigration-refugees-citizenship/news/notices/supplementary-immigration-levels-2023-2025.html)  
31 [citizenship/news/notices/supplementary-immigration-levels-2023-2025.html](https://www.canada.ca/en/immigration-refugees-citizenship/news/notices/supplementary-immigration-levels-2023-2025.html) (accessed September 15,  
32 2023).
- 33 48. MacFarlane MM. When a Canadian is not a Canadian: marginalization of IMGs in the CaRMS  
34 match. *Can Med Educ J* 2021;12(4):132-40. doi: 10.36834/cmej.71790
- 35 49. Tasker JP. Meet the Canadian-born doctors who can't work in Canada. *CBC News*. 2023.
- 36 50. Kost A, Bentley A, Phillips J, et al. Graduating Medical Student Perspectives on Factors  
37 Influencing Specialty Choice: An AAFP National Survey. *Fam Med* 2019;51(2):129-36. doi:  
38 10.22454/FamMed.2019.136973
- 39 51. Mahood SC. Medical education: Beware the hidden curriculum. *Can Fam Physician*  
40 2011;57(9):983-5.
- 41 52. Porter J, Boyd C, Skandari MR, et al. Revisiting the Time Needed to Provide Adult Primary Care.  
42 *J Gen Intern Med* 2023;38(1):147-55. doi: 10.1007/s11606-022-07707-x
- 43 53. The College of Family Physicians of Canada (CFPC). Preparing Our Future Family Physicians:  
44 An educational prescription for strengthening health care in changing times [online]. 2022.  
45 <https://www.cfpc.ca/CFPC/media/Resources/Education/AFM-OTP-Report.pdf> (accessed September 1,  
46 2023).
- 47 54. Bazemore A, Grunert T. Sailing the 7C's: Starfield Revisited as a Foundation of Family Medicine  
48 Residency Redesign.
- 49 55. Kiran T, Kopp A, Moineddin R, et al. Longitudinal evaluation of physician payment reform and  
50 team-based care for chronic disease management and prevention. *CMAJ* 2015;187(17):E494-E502. doi:  
51 10.1503/cmaj.150579
- 52 56. Chen PG, Mehrotra A, Auerbach DI. Do we really need more physicians? Responses to predicted  
53 primary care physician shortages. *Med Care* 2014;52(2):95-6. doi: 10.1097/mlr.000000000000046  
54  
55  
56  
57  
58  
59  
60

- 1  
2  
3 57. McMurchy D, Astles R. Final Report: An External Evaluation of the Family Health Team (FHT)  
4 Initiative [online]. 2014. <https://www.researchgate.net/publication/273866011> (accessed March 9, 2023).  
5 58. Ontario College of Family Physicians. Advocacy Alert [online]. 2023. <https://conta.cc/3stjST9>  
6 (accessed September 15, 2023).  
7 59. Babashahi S, Carey N, Jani Y, et al. Costs, consequences and value for money in non-medical  
8 prescribing: a scoping review. *BMJ Open* 2023;13(5):e067907. doi: 10.1136/bmjopen-2022-067907  
9 60. Batson B, Crosby S, Fitzpatrick J. Mississippi Frontline - Targeting Value-based Care with  
10 Physician-led Care Teams. *Journal of The Mississippi State Medical Association* 2022;63(1):1-21.  
11 61. Canadian Medical Association (CMA). CMA 2021 National Physician Health Survey [online].  
12 2022. [https://www.cma.ca/sites/default/files/2022-08/NPHS\\_final\\_report\\_EN.pdf](https://www.cma.ca/sites/default/files/2022-08/NPHS_final_report_EN.pdf) (accessed March 9,  
13 2023).  
14 62. Chan B, Schultz S. Supply and Utilization of General Practitioner and Family Physician Services  
15 in Ontario. ICES; 2005.  
16 63. Stukel TA, Glazier RH, Schultz SE, et al. Multispecialty physician networks in Ontario. *Open*  
17 *Med* 2013;7(2):e40-55.  
18 64. Nurse Practitioner Association of Ontario. Nurse Practitioners' Association of Ontario and Nurse  
19 Practitioner-led Clinic Association supports "Vision for Tomorrow" report [online]. 2022.  
20 [https://npao.org/nurse-practitioners-association-of-ontario-and-nurse-practitioner-led-clinic-association-](https://npao.org/nurse-practitioners-association-of-ontario-and-nurse-practitioner-led-clinic-association-supports-vision-for-tomorrow-report/)  
21 [supports-vision-for-tomorrow-report/](https://npao.org/nurse-practitioners-association-of-ontario-and-nurse-practitioner-led-clinic-association-supports-vision-for-tomorrow-report/) (accessed September 12, 2022).  
22 65. Bavafa H, Hitt LM, Terwiesch C. The Impact of E-Visits on Visit Frequencies and Patient  
23 Health: Evidence from Primary Care. *Manage Sci* 2018;64(12):5461-80. doi: 10.1287/mnsc.2017.2900  
24 66. Ashwood JS, Mehrotra A, Cowling D, et al. Direct-To-Consumer Telehealth May Increase  
25 Access To Care But Does Not Decrease Spending. *Health Aff* 2017;36(3):485-91. doi:  
26 10.1377/hlthaff.2016.1130  
27 67. Asch DA. The hidden economics of telemedicine. *Ann Intern Med* 2015;163(10):801-2. doi:  
28 10.7326/M15-1416  
29  
30  
31  
32  
33  
34  
35  
36  
37  
38  
39  
40  
41  
42  
43  
44  
45  
46  
47  
48  
49  
50  
51  
52  
53  
54  
55  
56  
57  
58  
59  
60



1  
2  
3 **FIGURE LEGENDS**  
4  
5  
6

7 **Figure 1a.** Cohort creation: Patients.  
8

9 **Figure 1b.** Cohort creation: Physicians  
10

11 **Figure 2.** Comprehensive family physicians by near-retirement group, year, and sex  
12

- 13 • **Figure 2 footnote:** Total Ns (all comprehensive family physicians):  
14 2008: 7,673  
15 2013: 8,050  
16 2019: 9,377  
17  
18  
19  
20  
21  
22  
23  
24  
25  
26  
27  
28  
29  
30  
31  
32  
33  
34  
35  
36  
37  
38  
39  
40  
41  
42  
43  
44  
45  
46  
47  
48  
49  
50  
51  
52  
53  
54  
55  
56  
57  
58  
59  
60

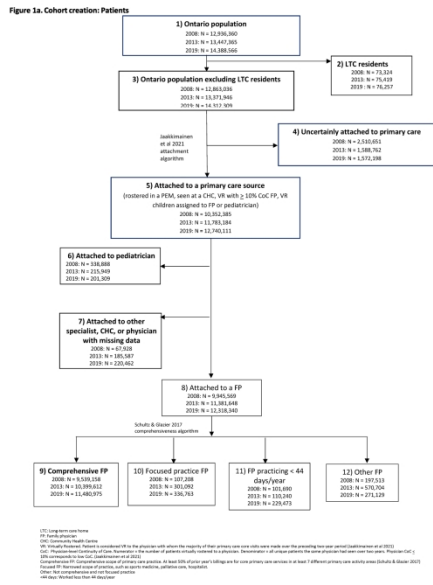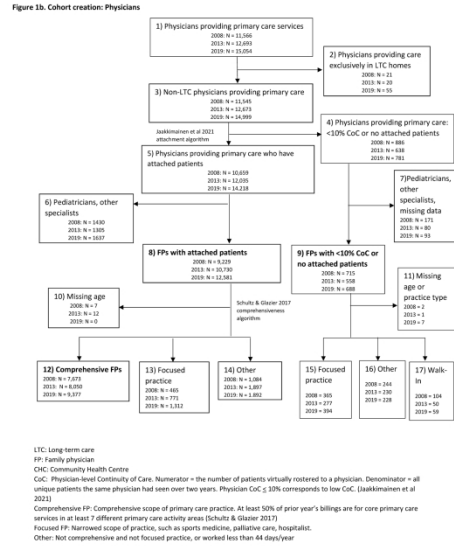

Figure 1a. Cohort creation: Patients. Figure 1b. Cohort creation: Physicians

431x279mm (300 x 300 DPI)

1  
2  
3  
4  
5  
6  
7  
8  
9  
10  
11  
12  
13  
14  
15  
16  
17  
18  
19  
20  
21  
22  
23  
24  
25  
26  
27  
28  
29  
30  
31  
32  
33  
34  
35  
36  
37  
38  
39  
40  
41  
42  
43  
44  
45  
46  
47  
48  
49  
50  
51  
52  
53  
54  
55  
56  
57  
58  
59  
60

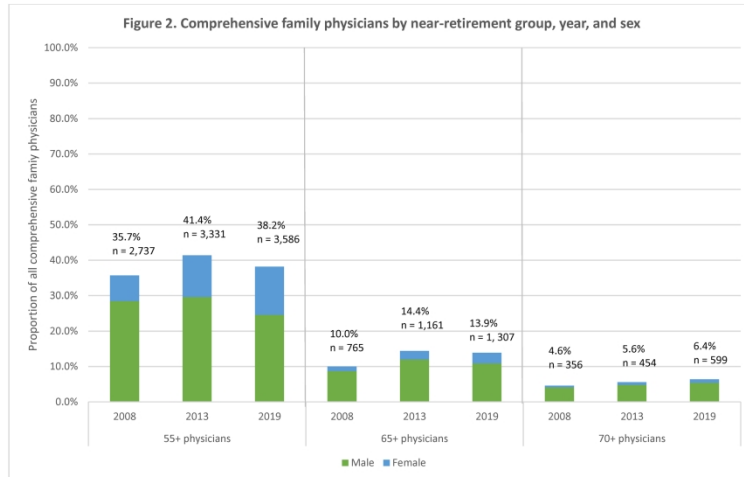

Total Ns (all comprehensive family physicians):  
 2008: 7,673  
 2013: 8,050  
 2019: 9,377

Comprehensive family physicians by near-retirement group, year, and sex

279x215mm (300 x 300 DPI)

## Supplemental eMethods. Data sources, cohort definitions, and variable definitions

We obtained study data from population-level, de-identified, linked health administrative databases housed at ICES. ICES is an independent, non-profit research institute whose legal status under Ontario's health information privacy law allows it to collect and analyze healthcare and demographic data, without consent, for health system evaluation and improvement. Secure access to these data is governed by policies and procedures that are approved by the Information and Privacy Commissioner of Ontario. In 2018, the institute formerly known as the Institute for Clinical Evaluative Sciences formally adopted the initialism ICES as its official name. This change acknowledges the growth and evolution of the organization's research since its inception in 1992, while retaining the familiarity of the former acronym within the scientific community and beyond.

The dataset from this study is held securely in coded form at ICES. While legal data sharing agreements between ICES and data providers (e.g., healthcare organizations and government) prohibit ICES from making the dataset publicly available, access may be granted to those who meet pre-specified criteria for confidential access, available at [www.ices.on.ca/DAS](http://www.ices.on.ca/DAS) (email: [das@ices.on.ca](mailto:das@ices.on.ca)). The full dataset creation plan and underlying analytic code are available from the authors upon request, understanding that the computer programs may rely upon coding templates or macros that are unique to ICES and are therefore either inaccessible or may require modification.

These datasets were linked using unique encoded identifiers and analyzed at ICES.

The index date for each covariate was the fiscal year-end for each time point: March 31, 2008, March 31, 2013, March 31, 2019.

Physician-level data came from the ICES Physician Database (age, sex, years in practice, practice specialty, practice type, full-time equivalence), the Primary Care Population database (geographic location, roster size, primary care model), and Ontario Health Insurance Plan (OHIP) billings (health services rendered). For physicians for whom birth month and date were missing, we imputed physician age based on birth year, with fiscal year end (March 31) as the index date. Physician gender is not available in ICES data, so physician sex was used instead, available as male and female.

Patient-level data came from the Registered Persons Database (age, sex, postal code, immigration status), the Client Agency Program Enrolment (CAPE) database (primary care enrolment model), the Community Health Centre database (CHC) (patients receiving health services at CHCs, which serve vulnerable patients), census data holdings (income quintiles and other marginalization indices), OHIP database (health services claims and associated diagnoses), Discharge Abstract Database linkages with OHIP (mental health diagnosis), and Johns Hopkins Adjusted Clinical Groups (frailty, resource utilization band).

Resource Utilization Bands (RUB): This was measured using the Johns Hopkins Adjusted Clinical Groups (ACG) Version 10.0. The RUB measure assesses expected health care use as a measure of patient complexity/morbidity.

Annual number of core primary care visits were based on activity billing codes for 22 primary care service types in the 12 months preceding the index date.

Rurality: We measured rurality using the practice postal code and the Rurality Index for Ontario (RIO) scoring methodology,<sup>1</sup> with the following categories: Large urban (score 0), Urban (score 1-9), Small Urban/Suburban (score 10–39), and Rural/Remote (score  $\geq 40$ ).

Full-time equivalency (FTE): FTE was calculated based on payments from all sources, with a 40th percentile cut-point corresponding with a FTE of 1.0.

Chronic diseases (COPD, CHF, Diabetes): These were measured using validated cohorts at ICES. The algorithm used to define cohorts varies slightly for each chronic condition, based on the original ICES algorithm for diabetes (i.e., two physician claims or one hospital admission with diabetes within two years). These disease cohorts are cumulative over time.

Frailty: This was measured using the Johns Hopkins Adjusted Clinical Groups (ACG) Version 10.0 frailty defining diagnoses indicator, which captures patients with multidimensional frailty at the population level and is based on 10 clusters of frailty defining dimensions: Malnutrition, dementia, impaired vision, decubitus ulcer, incontinence of urine, loss of weight, poverty, barriers to access to care, difficulty in walking, and falls. The indicator has been demonstrated to accurately identify patients with limitations in activities of daily living.

Mental illness: The case definition algorithm to identify patients with a mental health diagnosis over the last two years links two databases at ICES: The Discharge Abstract Databases (DAD) and OHIP. It is based on having two physician billing claims in OHIP over 2 years or one hospitalization with one of the listed mental health service codes (ICD9/ICD10).

Marginalization: We assessed three dimensions of marginalization (residential instability, material deprivation, and neighborhood ethnic concentration) using the Ontario Marginalization Index,<sup>2</sup> a census-derived geographically-based index.

Physician-level continuity of care (CoC): The algorithm considers patients to be virtually attached a primary care physician if they received the majority of their primary care over the preceding 2-year period from a physician with greater than 10% physician-level continuity of care (CoC). Physician-level CoC is a visit-based measure of the proportion of an individual physician visits over all physician's visits over a two-year time period. The numerator is the number of patients virtually attached to a physician, and the denominator is all unique patients the same physician had seen over two years. If the physician CoC is less than or equal to 10%, then this physician had a low CoC.

## References:

1. Kralj B. *Measuring 'Rurality' for Purposes of Health-Care Planning: An Empirical Measure for Ontario.*; 2009.
2. Matheson F, Moloney G, van Ingen T, Public Health Ontario. *2016 Ontario Marginalization Index: User Guide, 1st Revision.*; 2022. <https://www.publichealthontario.ca/-/media/documents/o/2017/on-marg->

1  
2  
3 userguide.pdf?la=en  
4  
5  
6  
7  
8  
9  
10  
11  
12  
13  
14  
15  
16  
17  
18  
19  
20  
21  
22  
23  
24  
25  
26  
27  
28  
29  
30  
31  
32  
33  
34  
35  
36  
37  
38  
39  
40  
41  
42  
43  
44  
45  
46  
47  
48  
49  
50  
51  
52  
53  
54  
55  
56  
57  
58  
59  
60

For peer review only

Supplemental eTable 1. Practice characteristics of comprehensive family physicians

|                             |      | <35 Years      |                |                | 35-44 Years     |                 |                 | 45-54 Years     |                  |                 | 55-64 Years     |                 |                 | 65-69 Years     |                 |                 | 70+ Years       |                 |                | Total Comprehensive FPs |                 |                 |
|-----------------------------|------|----------------|----------------|----------------|-----------------|-----------------|-----------------|-----------------|------------------|-----------------|-----------------|-----------------|-----------------|-----------------|-----------------|-----------------|-----------------|-----------------|----------------|-------------------------|-----------------|-----------------|
|                             |      | Total          | M              | F              | Total           | M               | F               | Total           | M                | F               | Total           | M               | F               | Total           | M               | F               | Total           | M               | F              | Total                   | M               | F               |
| Comp. FPs N (%)             | 2008 | 592 (7.7)      | 211 (35.6)     | 381 (64.4)     | 1877 (24.5)     | 922 (49.1)      | 955 (50.9)      | 2467 (32.2)     | 1422 (57.6)      | 1045 (42.4)     | 1972 (25.7)     | 1522 (77.2)     | 450 (22.8)      | 409 (5.3)       | 347 (84.8)      | 62 (15.2)       | 356 (4.6)       | 319 (89.6)      | 37 (10.4)      | 7673 (100.0)            | 4743 (61.8)     | 2930 (38.2)     |
|                             | 2013 | 741 (9.2)      | 245 (33.1)     | 496 (66.9)     | 1666 (20.7)     | 674 (40.5)      | 992 (59.5)      | 2312 (28.7)     | 1227 (53.1)      | 1085 (46.9)     | 2170 (27.0)     | 1415 (65.2)     | 755 (34.8)      | 707 (8.8)       | 576 (81.5)      | 131 (18.5)      | 454 (5.6)       | 392 (86.3)      | 62 (13.7)      | 8050 (100.0)            | 4529 (56.3)     | 3521 (43.7)     |
|                             | 2019 | 1414 (15.1)    | 528 (37.3)     | 886 (62.7)     | 2135 (22.8)     | 806 (37.8)      | 1329 (62.2)     | 2242 (23.9)     | 1048 (46.7)      | 1194 (53.3)     | 2279 (24.3)     | 1290 (56.6)     | 989 (43.4)      | 708 (7.6)       | 519 (73.3)      | 189 (26.7)      | 599 (6.4)       | 505 (84.3)      | 94 (15.7)      | 9377 (100.0)            | 4696 (50.1)     | 4681 (49.9)     |
| Years in pract. (mean (SD)) | 2008 | 6.0 (±2.3)     | 6.3 (±2.3)     | 5.9 (±2.2)     | 14.4 (±3.9)     | 14.7 (±3.8)     | 14.1 (±3.9)     | 23.7 (±4.2)     | 23.8 (±4.2)      | 23.5 (±4.2)     | 33.4 (±4.4)     | 33.6 (±4.2)     | 32.8 (±4.8)     | 41.3 (±3.0)     | 41.2 (±3.0)     | 42.0 (±3.2)     | 48.0 (±5.1)     | 48.0 (±4.9)     | 47.8 (±6.4)    | 24.6 (±11.4)            | 27.3 (±11.2)    | 20.2 (±10.1)    |
|                             | 2013 | 5.7 (±2.1)     | 5.4 (±2.1)     | 5.9 (±2.1)     | 13.8 (±4.2)     | 14.0 (±4.2)     | 13.7 (±4.1)     | 23.9 (±4.2)     | 23.9 (±4.0)      | 23.8 (±4.4)     | 33.2 (±4.4)     | 33.6 (±4.4)     | 32.5 (±4.5)     | 41.2 (±3.5)     | 41.1 (±3.4)     | 41.6 (±4.0)     | 48.7 (±4.9)     | 48.7 (±4.9)     | 49.0 (±4.9)    | 25.6 (±12.3)            | 28.8 (±12.1)    | 21.4 (±11.1)    |
|                             | 2019 | 5.8 (±2.0)     | 5.7 (±2.0)     | 5.8 (±1.9)     | 12.5 (±4.2)     | 12.5 (±4.4)     | 12.5 (±4.0)     | 23.7 (±4.7)     | 23.9 (±4.7)      | 23.5 (±4.6)     | 33.3 (±4.7)     | 33.4 (±4.5)     | 33.2 (±4.9)     | 40.8 (±3.6)     | 41.0 (±3.4)     | 40.3 (±4.0)     | 48.5 (±5.1)     | 48.4 (±5.3)     | 48.7 (±4.1)    | 23.7 (±13.4)            | 27.0 (±13.8)    | 20.3 (±12.0)    |
| Roster size (mean (SD))     | 2008 | 638.3 (±622.5) | 790.7 (±722.0) | 553.9 (±542.7) | 1131.8 (±873.2) | 1323.5 (±981.3) | 946.7 (±707.0)  | 1345.1 (±920.7) | 1470.3 (±996.7)  | 1174.6 (±774.4) | 1432.1 (±945.5) | 1494.0 (±961.5) | 1222.7 (±856.4) | 1123.1 (±955.1) | 1186.1 (±981.7) | 770.7 (±701.1)  | 566.3 (±770.9)  | 584.9 (±785.4)  | 406.5 (±618.7) | 1212.8 (±927.0)         | 1338.8 (±991.1) | 1008.8 (±770.0) |
|                             | 2013 | 620.0 (±605.9) | 725.2 (±690.9) | 568.0 (±552.6) | 1152.8 (±836.0) | 1348.6 (±935.1) | 1019.7 (±732.6) | 1407.1 (±927.1) | 1567.8 (±1013.4) | 1225.4 (±780.2) | 1490.2 (±894.6) | 1593.1 (±937.6) | 1297.2 (±772.4) | 1366.1 (±905.8) | 1420.3 (±921.3) | 1128.0 (±794.3) | 898.1 (±895.7)  | 946.7 (±922.9)  | 591.1 (±622.7) | 1272.1 (±909.2)         | 1425.0 (±975.2) | 1075.4 (±773.4) |
|                             | 2019 | 734.0 (±644.2) | 834.7 (±712.0) | 674.0 (±592.4) | 1074.5 (±720.3) | 1217.2 (±841.6) | 987.9 (±620.1)  | 1394.8 (±876.2) | 1529.3 (±946.5)  | 1276.7 (±791.2) | 1405.6 (±847.2) | 1531.6 (±902.2) | 1241.1 (±738.3) | 1434.4 (±900.5) | 1502.5 (±932.8) | 1247.6 (±777.3) | 1098.0 (±804.3) | 1125.7 (±815.1) | 949.2 (±729.6) | 1208.9 (±837.4)         | 1351.9 (±908.8) | 1065.4 (±731.6) |
| Core PC visits (mean (SD))  | 2008 | 6.2 (±2.7)     | 6.2 (±2.8)     | 6.2 (±2.7)     | 7.3 (±4.2)      | 7.5 (±5.6)      | 7.2 (±2.3)      | 7.3 (±2.3)      | 7.4 (±2.5)       | 7.3 (±2.1)      | 7.7 (±2.6)      | 7.7 (±2.6)      | 7.7 (±2.4)      | 7.5 (±3.1)      | 7.6 (±3.2)      | 6.9 (±2.7)      | 6.8 (±3.5)      | 6.9 (±3.5)      | 6.2 (±2.9)     | 7.3 (±3.1)              | 7.4 (±3.5)      | 7.1 (±2.4)      |
|                             | 2013 | 5.3 (±2.3)     | 5.4 (±2.3)     | 5.3 (±2.3)     | 6.3 (±2.1)      | 6.2 (±2.2)      | 6.3 (±2.0)      | 6.5 (±2.4)      | 6.6 (±2.7)       | 6.4 (±2.0)      | 6.7 (±2.8)      | 6.8 (±3.2)      | 6.4 (±1.9)      | 6.9 (±2.4)      | 6.9 (±2.4)      | 7.0 (±2.3)      | 7.3 (±4.0)      | 7.5 (±4.2)      | 6.5 (±2.4)     | 6.5 (±2.6)              | 6.6 (±2.9)      | 6.3 (±2.1)      |
|                             | 2019 | 5.6 (±2.5)     | 5.5 (±2.6)     | 5.6 (±2.4)     | 6.0 (±2.5)      | 5.9 (±2.8)      | 6.0 (±2.4)      | 6.1 (±2.1)      | 6.1 (±2.3)       | 6.1 (±1.9)      | 6.1 (±2.1)      | 6.2 (±2.3)      | 6.0 (±1.8)      | 6.4 (±2.2)      | 6.5 (±2.3)      | 6.2 (±2.0)      | 6.7 (±3.0)      | 6.5 (±2.9)      | 7.2 (±3.1)     | 6.0 (±2.3)              | 6.1 (±2.5)      | 6.0 (±2.2)      |
| Pt age (mean (SD))          | 2008 | 27.9 (±13.8)   | 29.4 (±14.0)   | 27.1 (±13.6)   | 31.7 (±11.7)    | 32.8 (±12.6)    | 30.5 (±10.7)    | 34.3 (±11.9)    | 35.4 (±12.5)     | 32.7 (±10.8)    | 36.7 (±13.1)    | 37.6 (±13.2)    | 33.7 (±12.2)    | 35.1 (±16.2)    | 36.0 (±16.1)    | 30.5 (±15.9)    | 28.2 (±18.5)    | 28.5 (±18.5)    | 25.5 (±17.8)   | 33.5 (±13.2)            | 34.9 (±13.8)    | 31.3 (±11.8)    |
|                             | 2013 | 28.2 (±13.7)   | 30.0 (±13.7)   | 27.4 (±13.6)   | 34.0 (±10.8)    | 35.0 (±11.6)    | 33.4 (±10.1)    | 36.4 (±10.7)    | 37.8 (±11.2)     | 34.8 (±9.9)     | 39.4 (±10.7)    | 40.5 (±11.1)    | 37.3 (±9.8)     | 40.9 (±12.6)    | 42.0 (±12.4)    | 36.3 (±12.7)    | 39.1 (±17.0)    | 39.7 (±17.1)    | 35.0 (±16.0)   | 36.5 (±12.1)            | 38.5 (±12.5)    | 34.0 (±11.2)    |
|                             | 2019 | 31.8 (±14.5)   | 33.5 (±14.2)   | 30.7 (±14.5)   | 36.4 (±10.9)    | 37.1 (±11.8)    | 36.0 (±10.3)    | 38.4 (±9.8)     | 39.4 (±10.6)     | 37.5 (±9.0)     | 40.6 (±10.5)    | 42.0 (±10.8)    | 38.7 (±9.8)     | 43.0 (±11.5)    | 43.9 (±11.6)    | 40.8 (±10.9)    | 43.3 (±14.3)    | 43.6 (±14.5)    | 41.2 (±13.1)   | 38.1 (±12.0)            | 40.0 (±12.3)    | 36.2 (±11.3)    |
| Prop. Fem. Pts (mean (SD))  | 2008 | 55.7 (±15.1)   | 46.9 (±10.7)   | 60.7 (±14.9)   | 55.2 (±13.2)    | 46.2 (±7.5)     | 63.8 (±11.6)    | 54.3 (±13.0)    | 46.3 (±7.4)      | 65.3 (±10.9)    | 51.0 (±11.0)    | 46.8 (±7.0)     | 65.0 (±10.7)    | 49.5 (±11.1)    | 47.3 (±8.5)     | 61.5 (±15.7)    | 47.8 (±13.2)    | 46.7 (±11.1)    | 57.6 (±22.6)   | 53.2 (±12.9)            | 46.6 (±7.8)     | 64.0 (±12.1)    |
|                             | 2013 | 55.3 (±15.6)   | 47.8 (±13.7)   | 59.0 (±15.1)   | 55.1 (±12.1)    | 46.1 (±8.3)     | 61.2 (±10.4)    | 53.7 (±12.3)    | 45.6 (±7.4)      | 62.9 (±9.9)     | 52.4 (±12.1)    | 45.9 (±7.5)     | 64.7 (±9.3)     | 48.9 (±10.1)    | 45.9 (±7.2)     | 62.2 (±10.5)    | 49.6 (±12.2)    | 47.2 (±10.4)    | 64.8 (±11.9)   | 53.1 (±12.5)            | 46.1 (±8.3)     | 62.3 (±11.0)    |
|                             | 2019 | 54.3 (±13.7)   | 47.7 (±11.2)   | 58.2 (±13.6)   | 54.3 (±11.8)    | 45.0 (±8.2)     | 59.9 (±10.0)    | 53.5 (±11.2)    | 45.4 (±7.6)      | 60.6 (±8.9)     | 52.4 (±11.8)    | 44.8 (±7.8)     | 62.2 (±8.5)     | 49.9 (±11.7)    | 45.1 (±7.9)     | 63.0 (±10.2)    | 48.2 (±9.9)     | 45.9 (±8.1)     | 60.7 (±9.6)    | 52.9 (±12.0)            | 45.5 (±8.4)     | 60.4 (±10.3)    |
| FTE (N (%))                 | 2008 | 290 (49.0)     | 146 (50.3)     | 144 (49.7)     | 1210 (64.5)     | 754 (62.3)      | 456 (37.7)      | 1802 (73.0)     | 1173 (65.1)      | 629 (34.9)      | 1481 (75.1)     | 1209 (81.6)     | 272 (18.4)      | 239 (58.4)      | 220 (92.1)      | 19 (8.0)        | 114 (32.0)      | 107 (93.9)      | 7 (6.1)        | 5136 (66.9)             | 3609 (70.3)     | 1527 (29.7)     |
|                             | 2013 | 335 (45.4)     | 152 (45.4)     | 183 (54.6)     | 1073 (64.4)     | 556 (51.8)      | 517 (48.2)      | 1694 (73.3)     | 1014 (59.9)      | 680 (40.1)      | 1634 (75.3)     | 1156 (70.8)     | 478 (29.3)      | 474 (67.0)      | 415 (87.6)      | 59 (12.5)       | 189 (41.6)      | 177 (93.7)      | 12 (6.4)       | 5399 (67.1)             | 3470 (64.3)     | 1929 (35.7)     |
|                             | 2019 | 734 (51.9)     | 351 (47.8)     | 383 (52.2)     | 1401 (65.6)     | 628 (44.8)      | 773 (55.2)      | 1722 (76.8)     | 881 (51.2)       | 841 (48.8)      | 1681 (73.8)     | 1052 (62.6)     | 629 (37.4)      | 514 (72.6)      | 402 (78.2)      | 112 (21.8)      | 327 (54.6)      | 288 (88.1)      | 39 (11.9)      | 6379 (68.0)             | 3602 (56.5)     | 2777 (43.5)     |

Comp. FPs: Comprehensive family physicians; Pract.: Practice; PC: Primary care; Pt(s): Patient(s); Prop: Proportion; Fem: Female; FTE: Comp FPs practicing full-time equivalent

Supplemental eTable 2. Family physicians who are in non-comprehensive scopes of practice (i.e., focused, other, walk-in) over time by physician age group

|                                          | <35 Years |              |                  | 35-44 Years |              |                    | 45-54 Years |              |                    | 55-64 Years |              |                    | 65-69 Years |              |                    | 70+ Years |              |                  | Total - Focused/Other/Walk-In |              | Total - All FPs |
|------------------------------------------|-----------|--------------|------------------|-------------|--------------|--------------------|-------------|--------------|--------------------|-------------|--------------|--------------------|-------------|--------------|--------------------|-----------|--------------|------------------|-------------------------------|--------------|-----------------|
|                                          | N         | % of all FPs | % of all FPs <35 | N           | % of all FPs | % of all FPs 35-44 | N           | % of all FPs | % of all FPs 45-54 | N           | % of all FPs | % of all FPs 55-64 | N           | % of all FPs | % of all FPs 65-69 | N         | % of all FPs | % of all FPs 70+ | N                             | % of all FPs | N               |
| <b>2008</b>                              | 305       | 3.1%         | 34.0%            | 652         | 6.6%         | 25.8%              | 581         | 5.8%         | 19.1%              | 430         | 4.3%         | 17.9%              | 133         | 1.3%         | 24.5%              | 161       | 1.6%         | 31.1%            | 2262                          | 22.7%        | 9,944           |
| <b>2013</b>                              | 503       | 4.5%         | 40.4%            | 755         | 6.7%         | 31.2%              | 708         | 6.3%         | 23.4%              | 615         | 5.4%         | 22.1%              | 278         | 2.5%         | 28.2%              | 366       | 3.2%         | 44.6%            | 3225                          | 28.6%        | 11,288          |
| <b>2019</b>                              | 697       | 5.3%         | 33.0%            | 827         | 6.2%         | 27.9%              | 716         | 5.4%         | 24.2%              | 757         | 5.7%         | 24.9%              | 374         | 2.8%         | 34.6%              | 514       | 3.9%         | 46.2%            | 3885                          | 29.3%        | 13,269          |
| <b>Relative Change (2019/2008)</b>       |           | 171%         | 97%              |             | 95%          | 108%               |             | 92%          | 127%               |             | 132%         | 139%               |             | 211%         | 141%               |           | 239%         | 148%             |                               | 129%         |                 |
| <b>Absolute Change (2019 minus 2008)</b> |           | 2.19%        | -0.98%           |             | -0.32%       | 2.14%              |             | -0.45%       | 5.14%              |             | 1.38%        | 7.03%              |             | 1.48%        | 10.03%             |           | 2.25%        | 15.04%           |                               | 6.53%        |                 |



Supplemental eTable 3. Comprehensive family physician practice model over time by physician age and sex

| Year | Model | Total |      | Age < 35   |      | Female     |      | Total |      | Age 35 - 44 |      | Female     |      | Total |      | Age 45 - 54 |      | Female     |      | Total    |      | Age 55 - 64 |      | Female   |      | Total  |      | Age 65 - 69 |      | Female   |      | Total |      | Age 70+    |      | Female   |      | Total Sample |      | Female |      |      |      |
|------|-------|-------|------|------------|------|------------|------|-------|------|-------------|------|------------|------|-------|------|-------------|------|------------|------|----------|------|-------------|------|----------|------|--------|------|-------------|------|----------|------|-------|------|------------|------|----------|------|--------------|------|--------|------|------|------|
|      |       | N     | %    | N          | %    | N          | %    | N     | %    | N           | %    | N          | %    | N     | %    | N           | %    | N          | %    | N        | %    | N           | %    | N        | %    | N      | %    | N           | %    | N        | %    | N     | %    | N          | %    | N        | %    | N            | %    | N      | %    |      |      |
| 2008 | EFFS  | 243   | 41   | 91         | 43.1 | 152        | 39.9 | 1009  | 53.8 | 513         | 55.6 | 496        | 51.9 | 1410  | 57.2 | 796         | 56   | 614        | 58.8 | 1194     | 60   | 903         | 59.3 | 281      | 62.4 | 210    | 51.3 | 174         | 50.1 | 36       | 58.1 | 142   | 39.9 | 129        | 40.4 | 13       | 35.1 | 4198         | 54.7 | 2606   | 54.9 | 1592 | 54.3 |
|      | CAP   | 56    | 9.5  | *11 - 15   |      | *43 - 47   |      | 167   | 8.9  | 70          | 7.6  | 97         | 10.2 | 191   | 7.7  | 114         | 8    | 77         | 7.4  | *128-132 |      | 104         | 6.8  | *24 - 28 |      | *30-34 |      | *27 - 31    |      | *1 - 5   |      | 7     | 2    | 7          | 2.2  | 0        | 0    | 583          | 7.6  | 337    | 7.1  | 246  | 8.4  |
|      | FHT   | 85    | 14.4 | 35         | 16.6 | 50         | 13.1 | 281   | 15   | 126         | 13.7 | 155        | 16.2 | 402   | 16.3 | 228         | 16   | 174        | 16.7 | *276-280 |      | 228         | 15   | *48 - 52 |      | 48     | 11.7 | *43-47      |      | *1 - 5   |      | 17    | 4.8  | *12-16     |      | *1 - 5   |      | 1113         | 14.5 | 680    | 14.3 | 433  | 14.8 |
|      | NOG   | 198   | 33.4 | 69         | 32.7 | 129        | 33.9 | 389   | 20.7 | 202         | 21.9 | 187        | 19.6 | 427   | 17.3 | 256         | 18   | 171        | 16.4 | 356      | 18.1 | 268         | 17.6 | 88       | 19.6 | 118    | 28.9 | *94-98      |      | *20 - 24 |      | 190   | 53.4 | *163-167   |      | *23 - 27 |      | 1678         | 21.9 | 1056   | 22.3 | 622  | 21.2 |
|      | OGP   | 10    | 1.7  | *1-5       |      | *3 - 7     |      | 31    | 1.7  | 11          | 1.2  | 20         | 2.1  | 37    | 1.5  | 28          | 2    | 9          | 0.9  | *20-24   |      | 19          | 1.2  | *1-5     |      | *1-5   |      | *1-5        |      | 0        | 0    | 0     | 0    | 0          | 0    | 0        | 0    | 101          | 1.3  | 64     | 1.3  | 37   | 1.3  |
| 2013 | EFFS  | 162   | 21.9 | 65         | 26.5 | 97         | 19.6 | 571   | 34.3 | 243         | 36.1 | 328        | 33.1 | 853   | 36.9 | 464         | 37.8 | 389        | 35.9 | 766      | 35.3 | 481         | 34   | 285      | 37.7 | 292    | 41.3 | 218         | 37.8 | 74       | 56.5 | 173   | 38.1 | 149        | 38   | 24       | 38.7 | 2817         | 35   | 1620   | 35.8 | 1197 | 34   |
|      | CAP   | 108   | 14.6 | *28 - 32   |      | *76-80     |      | 361   | 21.7 | *127 - 131  |      | *229 - 233 |      | 582   | 25.2 | 310         | 25.3 | 272        | 25.1 | 603      | 27.8 | 407         | 28.8 | 196      | 26   | 168    | 23.8 | 146         | 25.3 | 22       | 16.8 | 75    | 16.5 | *65-69     |      | *6 - 10  |      | 1897         | 23.6 | 1091   | 24.1 | 806  | 22.9 |
|      | FHT   | 186   | 25.1 | 64         | 26.1 | 122        | 24.6 | 461   | 27.7 | 183         | 27.2 | *276 - 280 |      | 547   | 23.7 | *266-270    |      | *277 - 281 |      | 501      | 23.1 | 325         | 23   | 176      | 23.3 | 127    | 18   | 114         | 19.8 | 13       | 9.9  | 55    | 12.1 | *50-54     |      | *1 - 5   |      | 1877         | 23.3 | 1007   | 22.2 | 870  | 24.7 |
|      | NOG   | 277   | 37.4 | 83         | 33.9 | 194        | 39.1 | 266   | 16   | 116         | 17.2 | 150        | 15.1 | 313   | 13.5 | 172         | 14   | 141        | 13   | 273      | 12.6 | 183         | 12.9 | 90       | 11.9 | 110    | 15.6 | 88          | 15.3 | 22       | 16.8 | 151   | 33.3 | 124        | 31.6 | 27       | 43.5 | 1390         | 17.3 | 766    | 16.9 | 624  | 17.7 |
|      | OGP   | 8     | 1.1  | *1-5       |      | *3-7       |      | 7     | 0.4  | *1-5        |      | *2 - 6     |      | 17    | 0.7  | *11-15      |      | *2 - 6     |      | 27       | 1.2  | 19          | 1.3  | 8        | 1.1  | 10     | 1.4  | 10          | 1.7  | 0        | 0    | 0     | 0    | 0          | 0    | 69       | 0.9  | 45           | 1    | 24     | 0.7  |      |      |
| 2019 | EFFS  | 249   | 17.6 | *103 - 107 |      | *144 - 148 |      | 518   | 24.3 | 218         | 27   | 300        | 22.6 | 712   | 31.8 | *348 - 352  |      | *360-364   |      | 707      | 31   | 408         | 31.6 | 299      | 30.2 | 244    | 34.5 | *163 - 167  |      | *75 - 79 |      | 239   | 39.9 | *190 - 194 |      | 48       | 51.1 | 2669         | 28.5 | 1437   | 30.6 | 1232 | 26.3 |
|      | CAP   | 341   | 24.1 | 124        | 23.5 | 217        | 24.5 | 597   | 28   | 193         | 23.9 | 404        | 30.4 | 699   | 31.2 | 315         | 30.1 | 384        | 32.2 | 725      | 31.8 | 399         | 30.9 | 326      | 33   | 221    | 31.2 | 176         | 33.9 | 45       | 23.8 | 165   | 27.5 | 145        | 28.9 | 19       | 20.2 | 2748         | 29.3 | 1353   | 28.8 | 1395 | 29.8 |
|      | FHT   | 376   | 26.6 | 137        | 25.9 | 239        | 27   | 683   | 32   | 252         | 31.3 | 431        | 32.4 | 583   | 26   | 255         | 24.3 | 328        | 27.5 | 577      | 25.3 | 321         | 24.9 | 256      | 25.9 | 151    | 21.3 | 109         | 21   | 42       | 22.2 | 79    | 13.2 | 71         | 14.1 | 8        | 8.5  | 2449         | 26.1 | 1145   | 24.4 | 1304 | 27.9 |
|      | NOG   | 437   | 30.9 | 157        | 29.7 | 280        | 31.6 | 316   | 14.8 | 133         | 16.5 | 183        | 13.8 | 237   | 10.6 | 123         | 11.7 | 114        | 9.5  | 241      | 10.6 | 141         | 10.9 | 100      | 10.1 | 82     | 11.6 | 64          | 12.3 | 22       | 11.6 | 112   | 18.7 | 93         | 18.4 | 19       | 20.2 | 1429         | 15.2 | 711    | 15.1 | 718  | 15.3 |
|      | OGP   | 11    | 0.8  | *3 - 7     |      | *2 - 6     |      | 21    | 1    | 10          | 1.2  | 11         | 0.8  | 11    | 0.5  | *3 - 7      |      | *4-8       |      | 29       | 1.3  | 21          | 1.6  | 8        | 0.8  | *6-10  |      | *3 - 7      |      | *1-5     |      | *1-5  |      | *1-5       |      | 0        | 0    | 82           | 0.9  | 50     | 1.1  | 32   | 0.7  |

Percentages are column percentages

Ranges preceded by an asterisk (\*) represent suppressed cells due to small cell sizes

EFFS: Enhanced fee-for-service. This is a fee-for-service payment model that requires patient enrollment and includes some pay enhancements, such as higher fee-for-service payments for enrolled patients and bonus payments for preventive care targets.

CAP: Capitation. An alternate payment plan (APP) model where the majority of physician payments come from an annual amount for each enrolled patient adjusted for patient age and sex.

FHT: Capitation models with additional funding for interdisciplinary team members such as nurse practitioners and social workers.

NOG: No group. These physicians are paid via traditional fee-for-service, without any enrollment requirements or pay enhancements.

OGP: Other physician group types, typically serving a specific targeted population or geography (for example, rural/remote) with varying funding mechanisms.

## Supplemental eTable 4. Geographic Distribution of Comprehensive FPs

### A. Comprehensive FPs by Geography

|                            | Large Urban  | Urban        | Small Urban/Suburban | Rural/Remote | Total         |
|----------------------------|--------------|--------------|----------------------|--------------|---------------|
| <b>2008</b>                |              |              |                      |              |               |
| N (% of Comprehensive FPs) | 3,909 (51.1) | 1,990 (26.0) | 1,236 (16.2)         | 513 (6.7)    | 7,648 (100.0) |
| <b>2013</b>                |              |              |                      |              |               |
| N (% of Comprehensive FPs) | 4,105 (51.1) | 2,314 (28.8) | 1,207 (15.0)         | 410 (5.1)    | 8,036 (100.0) |
| <b>2019</b>                |              |              |                      |              |               |
| N (% of Comprehensive FPs) | 4,674 (50.0) | 2,685 (28.7) | 14,98 (16.0)         | 492 (5.3)    | 9,349 (100.0) |

Note: Geographic data missing for: 2008 (25), 2013 (14), 2019 (28)

### B. Rural (RIO 40+) Comprehensive FPs by Age Group

|                                  | <35 years | 35-44 years | 45-54 years | 55-64 years | 65-69 years | 70+ years | Total       |
|----------------------------------|-----------|-------------|-------------|-------------|-------------|-----------|-------------|
| <b>2008</b>                      |           |             |             |             |             |           |             |
| N (% of rural comprehensive FPs) | 46 (9.0)  | 135 (26.3)  | 166 (32.4)  | 118 (23.0)  | 27 (5.3)    | 21 (4.1)  | 513 (100.0) |
| <b>2013</b>                      |           |             |             |             |             |           |             |
| N (% of rural comprehensive FPs) | 31 (7.6)  | 76 (18.5)   | 109 (26.6)  | 129 (31.5)  | 44 (10.7)   | 21 (5.1)  | 410 (100.0) |
| <b>2019</b>                      |           |             |             |             |             |           |             |
| N (% of rural comprehensive FPs) | 89 (18.1) | 111 (22.6)  | 121 (24.6)  | 117 (23.8)  | 32 (6.5)    | 22 (4.5)  | 492 (100.0) |

C. Rural (RIO 40+) Comprehensive FPs by Physicians Sex

|             | Male Physicians |                              |                            | Female Physicians |                              |                            | Total Rural |                            | All Comprehensive FPs |                            |
|-------------|-----------------|------------------------------|----------------------------|-------------------|------------------------------|----------------------------|-------------|----------------------------|-----------------------|----------------------------|
|             | N               | % of Rural Comprehensive FPs | % of all Comprehensive FPs | N                 | % of Rural Comprehensive FPs | % of all Comprehensive FPs | N           | % of all Comprehensive FPs | N                     | % of all Comprehensive FPs |
| <b>2008</b> | 362             | 70.6                         | 4.7                        | 151               | 29.4                         | 2                          | 513         | 6.7                        | 7648                  | 6.7                        |
| <b>2013</b> | 268             | 65.4                         | 3.3                        | 142               | 34.6                         | 1.8                        | 410         | 5.1                        | 8036                  | 5.1                        |
| <b>2019</b> | 279             | 56.7                         | 3                          | 213               | 43.3                         | 2.3                        | 492         | 5.3                        | 9349                  | 5.3                        |

We were unable to stratify by both age and sex due to suppressed cells (cell sizes <6) in older age categories for male and female physicians in the rural category.

Large urban: Rurality Index of Ontario (RIO) score of 0

Urban: RIO score of 1-9

Suburban/Small Urban: RIO score of 10-39

Rural/remote: RIO score of 40+

**Supplemental eTable 5. Practice characteristics: Medical and social complexity of patients attached to comprehensive family physicians over time by physician age and sex**

|                                                           |      | <35 Years |      |      | 35-44 Years |      |      | 45-54 Years |      |      | 55-64 Years |      |      | 65-69 Years |      |      | 70+ Years |      |      | TOTAL |      |      |
|-----------------------------------------------------------|------|-----------|------|------|-------------|------|------|-------------|------|------|-------------|------|------|-------------|------|------|-----------|------|------|-------|------|------|
|                                                           |      | Total     | M    | F    | Total       | M    | F    | Total       | M    | F    | Total       | M    | F    | Total       | M    | F    | Total     | M    | F    | Total | M    | F    |
|                                                           |      | %         | %    | %    | %           | %    | %    | %           | %    | %    | %           | %    | %    | %           | %    | %    | %         | %    | %    | %     | %    | %    |
| <b>Highest morbidity (RUB 4+)</b>                         | 2008 | 15.3      | 14.7 | 15.6 | 16.2        | 15.8 | 16.7 | 16.4        | 16.5 | 16.2 | 17.3        | 17.5 | 16.6 | 16.8        | 17.2 | 14.0 | 14.0      | 14.1 | 13.0 | 16.5  | 16.7 | 16.3 |
|                                                           | 2013 | 17.5      | 17.6 | 17.4 | 18.2        | 17.5 | 18.7 | 17.7        | 17.8 | 17.6 | 18.1        | 18.5 | 17.3 | 19.5        | 20.0 | 17.5 | 20.1      | 20.5 | 17.9 | 18.1  | 18.3 | 17.8 |
|                                                           | 2019 | 19.3      | 19.4 | 19.2 | 20.6        | 20.2 | 20.8 | 19.4        | 19.4 | 19.4 | 19.5        | 20.2 | 18.7 | 20.3        | 20.4 | 20.1 | 21.4      | 21.5 | 21.3 | 19.8  | 19.9 | 19.7 |
| <b>Lowest income quintile</b>                             | 2008 | 18.5      | 19.2 | 18.1 | 18.1        | 19.6 | 16.6 | 18.4        | 19.8 | 16.4 | 19.9        | 20.2 | 18.8 | 22.6        | 22.5 | 23.6 | 23.9      | 20.1 | 17.2 | 19.0  | 20.1 | 17.2 |
|                                                           | 2013 | 18.9      | 20.6 | 18.0 | 17.2        | 19.1 | 16.0 | 18.0        | 19.4 | 16.4 | 18.4        | 19.5 | 16.5 | 20.5        | 20.4 | 21.2 | 24.0      | 24.2 | 22.5 | 18.3  | 19.6 | 16.7 |
|                                                           | 2019 | 20.4      | 21.9 | 20.7 | 18.8        | 20.7 | 17.6 | 18.3        | 20.5 | 16.5 | 18.8        | 20.4 | 16.8 | 19.9        | 20.7 | 17.9 | 22.1      | 22.2 | 21.4 | 19.0  | 20.7 | 17.5 |
| <b>Highest housing instability quintile</b>               | 2008 | 24.5      | 22.8 | 25.5 | 20.6        | 20.7 | 20.4 | 20.4        | 20.4 | 20.4 | 21.9        | 21.6 | 23.0 | 24.0        | 23.1 | 29.2 | 25.5      | 25.6 | 24.2 | 21.4  | 21.2 | 21.7 |
|                                                           | 2013 | 26.0      | 23.6 | 27.2 | 21.8        | 20.9 | 22.5 | 19.9        | 20.4 | 19.4 | 20.8        | 20.6 | 21.3 | 21.7        | 21.8 | 21.2 | 24.5      | 24.1 | 26.6 | 21.4  | 20.9 | 21.9 |
|                                                           | 2019 | 26.5      | 25.3 | 27.2 | 24.5        | 24.7 | 24.5 | 21.1        | 21.8 | 20.4 | 21.4        | 21.5 | 21.3 | 22.6        | 21.7 | 24.9 | 25.5      | 25.2 | 27.1 | 23.0  | 22.7 | 23.3 |
| <b>Highest material deprivation quintile</b>              | 2008 | 18.6      | 19.8 | 17.9 | 17.4        | 19.3 | 15.5 | 18.2        | 20.1 | 15.6 | 20.5        | 21.3 | 18.1 | 23.7        | 23.9 | 22.4 | 25.7      | 26.2 | 21.3 | 19.0  | 20.6 | 16.4 |
|                                                           | 2013 | 22.9      | 24.6 | 22.0 | 20.5        | 22.1 | 19.4 | 21.2        | 22.9 | 19.3 | 21.4        | 22.6 | 19.2 | 23.7        | 23.2 | 25.7 | 29.2      | 29.4 | 27.8 | 21.5  | 22.8 | 19.9 |
|                                                           | 2019 | 18.2      | 19.7 | 17.3 | 17.3        | 19.9 | 15.8 | 17.0        | 19.3 | 15.0 | 18.1        | 19.8 | 15.9 | 19.7        | 20.9 | 16.7 | 21.8      | 22.1 | 19.9 | 17.8  | 19.8 | 15.9 |
| <b>Highest neighborhood ethnic concentration quintile</b> | 2008 | 27.4      | 30.8 | 25.5 | 27.5        | 28.4 | 26.5 | 26.0        | 26.1 | 25.9 | 27.2        | 26.3 | 30.4 | 28.0        | 26.4 | 37.2 | 32.6      | 32.8 | 30.7 | 26.9  | 26.9 | 27.0 |
|                                                           | 2013 | 29.9      | 31.1 | 29.2 | 28.6        | 29.2 | 28.2 | 27.9        | 29.2 | 26.6 | 27.2        | 27.2 | 27.3 | 27.7        | 25.5 | 37.3 | 33.0      | 32.0 | 39.4 | 28.0  | 28.1 | 28.0 |
|                                                           | 2019 | 26.0      | 26.6 | 25.7 | 25.8        | 27.2 | 25.0 | 28.5        | 29.2 | 27.8 | 27.0        | 26.8 | 27.3 | 33.2        | 33.7 | 31.9 | 32.1      | 30.9 | 38.5 | 27.4  | 28.3 | 26.7 |

Interpretation: For example, in 2008, within the group of comprehensive family physicians under the age of 35 years, 15.3% of patients in those practices had the highest level of morbidity (RUB 4+). When further stratified by physician sex, 14.7% of patients attached to male comprehensive family physicians belonged to the highest morbidity (RUB 4+) group.

RUB: Morbidity, based on Resource Utilization Band

Supplemental eFigure 1. Proportion of family physicians practicing comprehensiveness by year, age, and sex

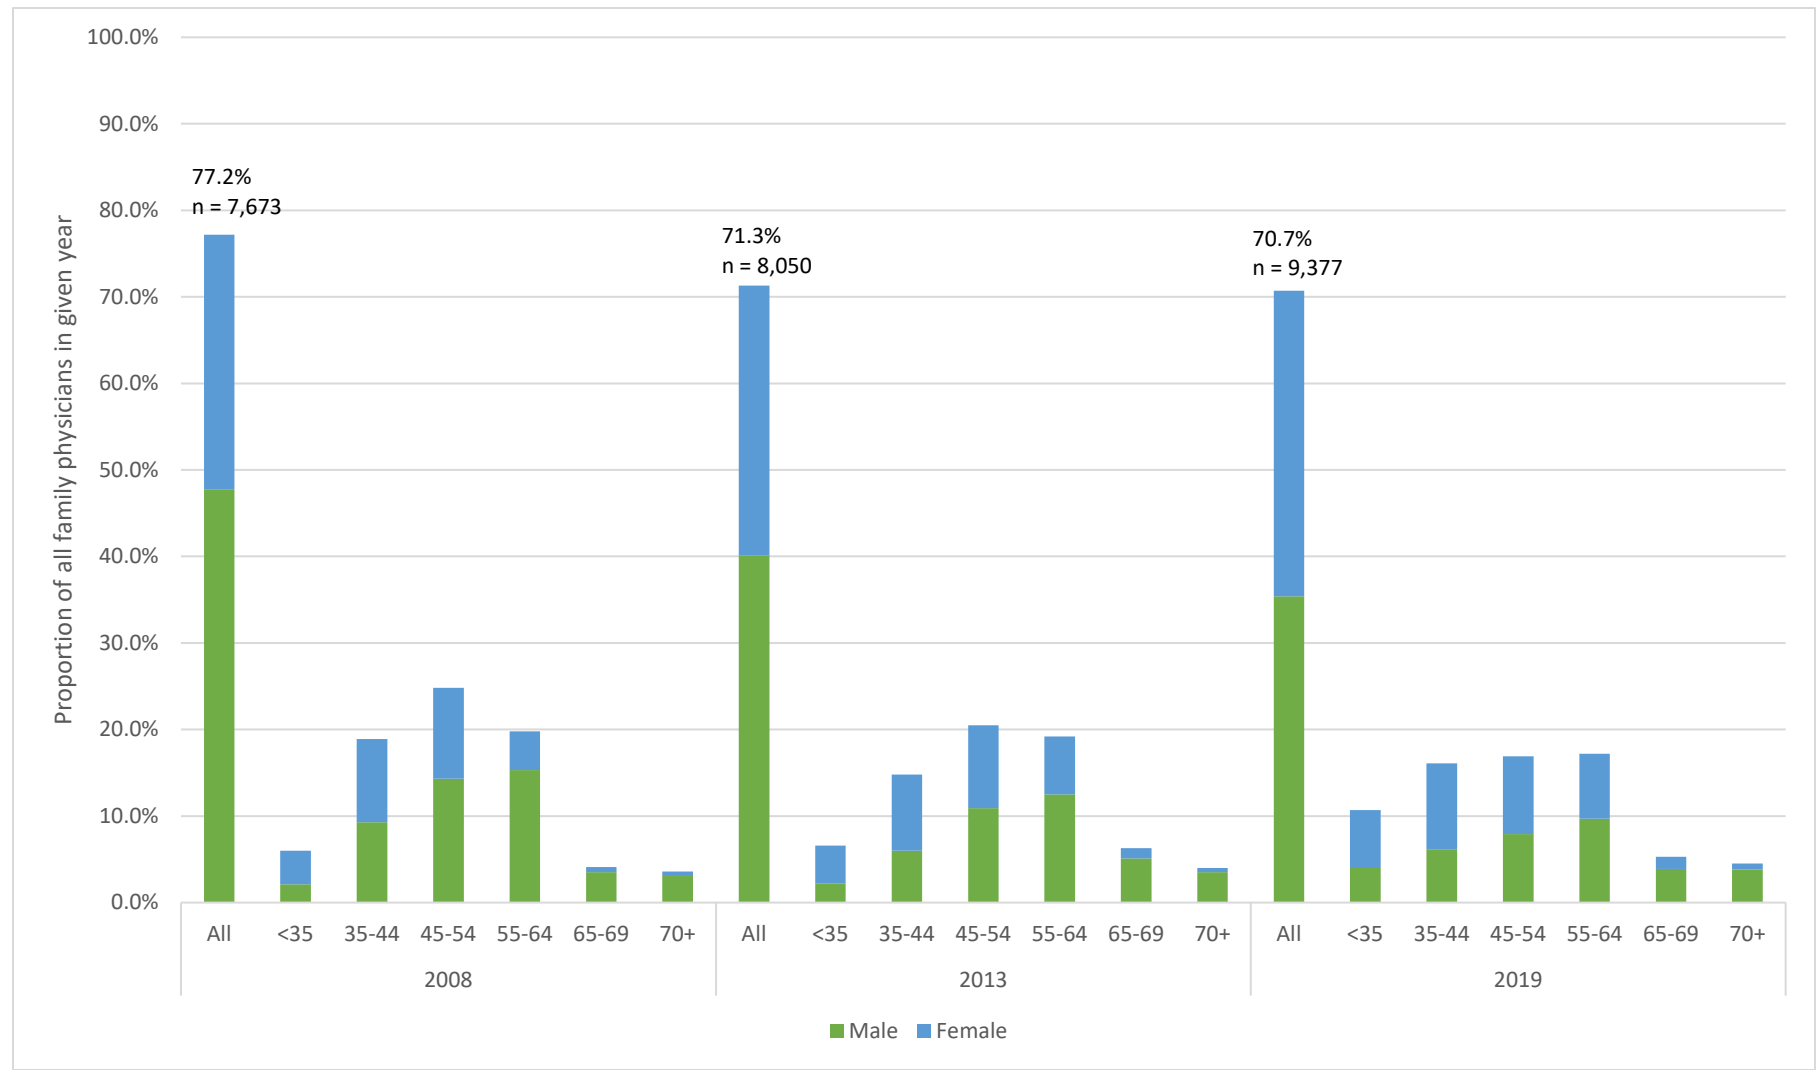

Total Ns (all family physicians): 2008: 9,944; 2013: 11,288; 2019: 13,269

**Supplemental eFigure 2. Proportion of comprehensive family physicians in various practice models by year**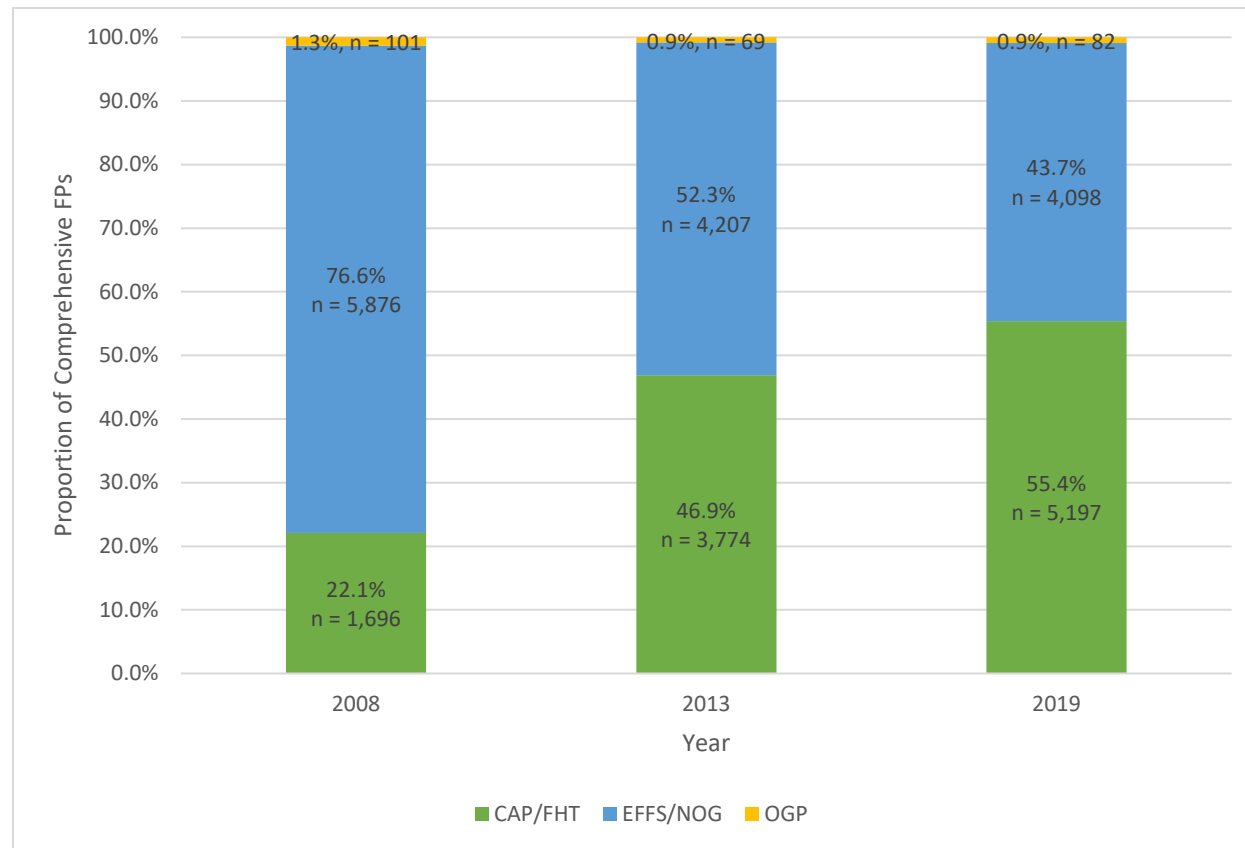

Total Ns (all comprehensive family physicians): 2008: 7,673; 2013: 8,050; 2019: 9,377

CAP/FHT: Alternate payment plan (APP) model where physician payments are mainly capitation (CAP)-based (annual amount per enrolled patient, adjusted for patient age and sex), with or without additional funding for interdisciplinary team members (Family Health Team (FHT)) such as nurse practitioners and social workers

EFFS/NOG: Fee-for-service payment models. EFFS = fee-for-service payments with enrolment requirements and some pay enhancements, such as higher payments for enrolled patients and bonus payments for meeting preventive care targets. NOG = No group; traditional fee-for-service payments with no enrolment requirements or payment enhancements.

STROBE Statement—Checklist of items that should be included in reports of *cross-sectional studies*

|                           | Item No                                                                            | Recommendation                                                                                                                                                                                    | Page No                    |
|---------------------------|------------------------------------------------------------------------------------|---------------------------------------------------------------------------------------------------------------------------------------------------------------------------------------------------|----------------------------|
| <b>Title and abstract</b> | 1                                                                                  | (a) Indicate the study's design with a commonly used term in the title or the abstract                                                                                                            | 1, 2-3                     |
|                           |                                                                                    | (b) Provide in the abstract an informative and balanced summary of what was done and what was found                                                                                               | 2-3                        |
| <b>Introduction</b>       |                                                                                    |                                                                                                                                                                                                   |                            |
| Background/rationale      | 2                                                                                  | Explain the scientific background and rationale for the investigation being reported                                                                                                              | 5-6                        |
| Objectives                | 3                                                                                  | State specific objectives, including any prespecified hypotheses                                                                                                                                  | 6                          |
| <b>Methods</b>            |                                                                                    |                                                                                                                                                                                                   |                            |
| Study design              | 4                                                                                  | Present key elements of study design early in the paper                                                                                                                                           | 6-8                        |
| Setting                   | 5                                                                                  | Describe the setting, locations, and relevant dates, including periods of recruitment, exposure, follow-up, and data collection                                                                   | 7-8                        |
| Participants              | 6                                                                                  | (a) Give the eligibility criteria, and the sources and methods of selection of participants                                                                                                       | 7-9                        |
| Variables                 | 7                                                                                  | Clearly define all outcomes, exposures, predictors, potential confounders, and effect modifiers. Give diagnostic criteria, if applicable                                                          | 7-9, Supplemental eMethods |
| Data sources/measurement  | 8*                                                                                 | For each variable of interest, give sources of data and details of methods of assessment (measurement). Describe comparability of assessment methods if there is more than one group              | 7-9, Supplemental eMethods |
| Bias                      | 9                                                                                  | Describe any efforts to address potential sources of bias                                                                                                                                         | Figure 1a, 1b              |
| Study size                | 10                                                                                 | Explain how the study size was arrived at                                                                                                                                                         | 8-9, Figure 1a, 1b         |
| Quantitative variables    | 11                                                                                 | Explain how quantitative variables were handled in the analyses. If applicable, describe which groupings were chosen and why                                                                      | 8-9                        |
| Statistical methods       | 12                                                                                 | (a) Describe all statistical methods, including those used to control for confounding                                                                                                             | 8-9                        |
|                           |                                                                                    | (b) Describe any methods used to examine subgroups and interactions                                                                                                                               | 8-9                        |
|                           | (c) Explain how missing data were addressed                                        | 7, Supplemental eTable 4                                                                                                                                                                          |                            |
|                           | (d) If applicable, describe analytical methods taking account of sampling strategy | n/a                                                                                                                                                                                               |                            |
|                           | (e) Describe any sensitivity analyses                                              | n/a                                                                                                                                                                                               |                            |
| <b>Results</b>            |                                                                                    |                                                                                                                                                                                                   |                            |
| Participants              | 13*                                                                                | (a) Report numbers of individuals at each stage of study—eg numbers potentially eligible, examined for eligibility, confirmed eligible, included in the study, completing follow-up, and analysed | 9, Figure 1a, 1b           |
|                           |                                                                                    | (b) Give reasons for non-participation at each stage                                                                                                                                              | 9, Figure 1a, 1b           |
|                           |                                                                                    | (c) Consider use of a flow diagram                                                                                                                                                                | Figure 1a, 1b              |

|                          |     |                                                                                                                                                                                                              |                                      |
|--------------------------|-----|--------------------------------------------------------------------------------------------------------------------------------------------------------------------------------------------------------------|--------------------------------------|
| Descriptive data         | 14* | (a) Give characteristics of study participants (eg demographic, clinical, social) and information on exposures and potential confounders                                                                     | 8-16                                 |
|                          |     | (b) Indicate number of participants with missing data for each variable of interest                                                                                                                          | Figure 1a, 1b, Supplemental eTable 4 |
| Outcome data             | 15* | Report numbers of outcome events or summary measures                                                                                                                                                         | 9-16                                 |
| Main results             | 16  | (a) Give unadjusted estimates and, if applicable, confounder-adjusted estimates and their precision (eg, 95% confidence interval). Make clear which confounders were adjusted for and why they were included | 9-16                                 |
|                          |     | (b) Report category boundaries when continuous variables were categorized                                                                                                                                    | n/a                                  |
|                          |     | (c) If relevant, consider translating estimates of relative risk into absolute risk for a meaningful time period                                                                                             | n/a                                  |
| Other analyses           | 17  | Report other analyses done—eg analyses of subgroups and interactions, and sensitivity analyses                                                                                                               | n/a                                  |
| <b>Discussion</b>        |     |                                                                                                                                                                                                              |                                      |
| Key results              | 18  | Summarise key results with reference to study objectives                                                                                                                                                     | 17-18                                |
| Limitations              | 19  | Discuss limitations of the study, taking into account sources of potential bias or imprecision. Discuss both direction and magnitude of any potential bias                                                   | 19-20                                |
| Interpretation           | 20  | Give a cautious overall interpretation of results considering objectives, limitations, multiplicity of analyses, results from similar studies, and other relevant evidence                                   | 17-20                                |
| Generalisability         | 21  | Discuss the generalisability (external validity) of the study results                                                                                                                                        | 19-20                                |
| <b>Other information</b> |     |                                                                                                                                                                                                              |                                      |
| Funding                  | 22  | Give the source of funding and the role of the funders for the present study and, if applicable, for the original study on which the present article is based                                                | 21-22                                |

\*Give information separately for exposed and unexposed groups.

**Note:** An Explanation and Elaboration article discusses each checklist item and gives methodological background and published examples of transparent reporting. The STROBE checklist is best used in conjunction with this article (freely available on the Web sites of PLoS Medicine at <http://www.plosmedicine.org/>, Annals of Internal Medicine at <http://www.annals.org/>, and Epidemiology at <http://www.epidem.com/>). Information on the STROBE Initiative is available at [www.strobe-statement.org](http://www.strobe-statement.org).



# BMJ Open

## The characteristics of patients attached to near-retirement family physicians: a population-based serial cross-sectional study in Ontario, Canada

|                                 |                                                                                                                                                                                                                                                                                                                                                                                                                                                                                                                                                                                                                                                                                                                                                                                                                                                                                                                                                                                                                                                                                    |
|---------------------------------|------------------------------------------------------------------------------------------------------------------------------------------------------------------------------------------------------------------------------------------------------------------------------------------------------------------------------------------------------------------------------------------------------------------------------------------------------------------------------------------------------------------------------------------------------------------------------------------------------------------------------------------------------------------------------------------------------------------------------------------------------------------------------------------------------------------------------------------------------------------------------------------------------------------------------------------------------------------------------------------------------------------------------------------------------------------------------------|
| Journal:                        | <i>BMJ Open</i>                                                                                                                                                                                                                                                                                                                                                                                                                                                                                                                                                                                                                                                                                                                                                                                                                                                                                                                                                                                                                                                                    |
| Manuscript ID                   | bmjopen-2023-074120.R2                                                                                                                                                                                                                                                                                                                                                                                                                                                                                                                                                                                                                                                                                                                                                                                                                                                                                                                                                                                                                                                             |
| Article Type:                   | Original research                                                                                                                                                                                                                                                                                                                                                                                                                                                                                                                                                                                                                                                                                                                                                                                                                                                                                                                                                                                                                                                                  |
| Date Submitted by the Author:   | 14-Nov-2023                                                                                                                                                                                                                                                                                                                                                                                                                                                                                                                                                                                                                                                                                                                                                                                                                                                                                                                                                                                                                                                                        |
| Complete List of Authors:       | Premji, Kamila; University of Western Ontario, Department of Family Medicine; University of Ottawa, Department of Family Medicine<br>Green, Michael; Queen's University, Department of Family Medicine; Queen's University, Health Services and Policy Research Institute<br>Glazier, Richard; Institute for Clinical Evaluative Sciences; St Michael's Hospital, MAP Centre for Urban Health Solutions<br>Khan, Shahriar; Institute for Clinical Evaluative Sciences; Queen's University, Health Services and Policy Research Institute<br>Schultz, Susan; Institute for Clinical Evaluative Sciences<br>Mathews, Maria; University of Ottawa, Department of Family Medicine; University of Western Ontario, Department of Epidemiology and Biostatistics<br>Nastos, Steve; Ontario Medical Association, Economics, Policy & Research<br>Frymire, Eliot; Queen's University, Health Services and Policy Research Institute<br>Ryan, BL; University of Western Ontario, Department of Family Medicine; University of Western Ontario, Department of Epidemiology and Biostatistics |
| <b>Primary Subject Heading</b>: | General practice / Family practice                                                                                                                                                                                                                                                                                                                                                                                                                                                                                                                                                                                                                                                                                                                                                                                                                                                                                                                                                                                                                                                 |
| Secondary Subject Heading:      | Health services research, Health policy                                                                                                                                                                                                                                                                                                                                                                                                                                                                                                                                                                                                                                                                                                                                                                                                                                                                                                                                                                                                                                            |
| Keywords:                       | Primary Health Care, Health policy < HEALTH SERVICES ADMINISTRATION & MANAGEMENT, Health Services Accessibility, Human resource management < HEALTH SERVICES ADMINISTRATION & MANAGEMENT, Physicians                                                                                                                                                                                                                                                                                                                                                                                                                                                                                                                                                                                                                                                                                                                                                                                                                                                                               |
|                                 |                                                                                                                                                                                                                                                                                                                                                                                                                                                                                                                                                                                                                                                                                                                                                                                                                                                                                                                                                                                                                                                                                    |

SCHOLARONE™  
Manuscripts



I, the Submitting Author has the right to grant and does grant on behalf of all authors of the Work (as defined in the below author licence), an exclusive licence and/or a non-exclusive licence for contributions from authors who are: i) UK Crown employees; ii) where BMJ has agreed a CC-BY licence shall apply, and/or iii) in accordance with the terms applicable for US Federal Government officers or employees acting as part of their official duties; on a worldwide, perpetual, irrevocable, royalty-free basis to BMJ Publishing Group Ltd ("BMJ") its licensees and where the relevant Journal is co-owned by BMJ to the co-owners of the Journal, to publish the Work in this journal and any other BMJ products and to exploit all rights, as set out in our [licence](#).

The Submitting Author accepts and understands that any supply made under these terms is made by BMJ to the Submitting Author unless you are acting as an employee on behalf of your employer or a postgraduate student of an affiliated institution which is paying any applicable article publishing charge ("APC") for Open Access articles. Where the Submitting Author wishes to make the Work available on an Open Access basis (and intends to pay the relevant APC), the terms of reuse of such Open Access shall be governed by a Creative Commons licence – details of these licences and which [Creative Commons](#) licence will apply to this Work are set out in our licence referred to above.

Other than as permitted in any relevant BMJ Author's Self Archiving Policies, I confirm this Work has not been accepted for publication elsewhere, is not being considered for publication elsewhere and does not duplicate material already published. I confirm all authors consent to publication of this Work and authorise the granting of this licence.

1  
2  
3 **The characteristics of patients attached to near-retirement family physicians: a population-**  
4 **based serial cross-sectional study in Ontario, Canada**  
5

6 Kamila Premji<sup>1,2</sup> MD, PhD  
7

8 Michael E Green<sup>3,4</sup> MD, MPH  
9

10 Richard H Glazier<sup>5,6</sup> MD, MPH  
11

12 Shahriar Khan<sup>4,5</sup> PhD  
13

14 Susan E Schultz<sup>5</sup> MA, MSc  
15

16 Maria Mathews<sup>2,7</sup> PhD  
17

18 Steve Nastos<sup>8</sup> MA  
19

20 Eliot Frymire<sup>4</sup> MA  
21

22 Bridget L Ryan<sup>1,7</sup> PhD  
23  
24

25 <sup>1</sup> Department of Family Medicine, University of Western Ontario, London, Ontario, Canada  
26

27 <sup>2</sup> Department of Family Medicine, University of Ottawa, Ottawa, Ontario, Canada  
28

29 <sup>3</sup> Department of Family Medicine, Queen's University, Kingston, Ontario, Canada  
30

31 <sup>4</sup> Health Services and Policy Research Institute, Queen's University, Kingston, Ontario, Canada  
32

33 <sup>5</sup> ICES, Toronto, Ontario, Canada  
34

35 <sup>6</sup> MAP Centre for Urban Health Solutions, St. Michael's Hospital, Toronto, Ontario, Canada  
36

37 <sup>7</sup> Department of Epidemiology and Biostatistics, University of Western Ontario, London,  
38 Ontario, Canada  
39

40 <sup>8</sup> Economics, Policy & Research, Ontario Medical Association, Toronto, Ontario, Canada  
41  
42  
43

44 Correspondence to:

45 Kamila Premji  
46

47 201-381 Kent Street, Ottawa, ON, K2P 2A8, Canada  
48

49 [kpemji2@uottawa.ca](mailto:kpemji2@uottawa.ca)  
50  
51  
52  
53  
54  
55  
56  
57  
58  
59  
60

## ABSTRACT

**Objectives:** Population aging is a global phenomenon. Resultant healthcare workforce shortages are anticipated. To ensure access to comprehensive primary care, which correlates with improved health outcomes, equity, and costs, data to inform workforce planning are urgently needed. We examined the medical and social characteristics of patients attached to near-retirement comprehensive primary care physicians over time and explored the early- and mid-career workforce's capacity to absorb these patients.

**Design:** A serial cross-sectional population-based analysis using health administrative data.

**Setting:** Ontario, Canada, where most comprehensive primary care is delivered by family physicians (FPs) under universal insurance.

**Participants:** All insured Ontario residents at three time points: 2008 (12,936,360), 2013 (13,447,365), and 2019 (14,388,566) and all Ontario physicians who billed primary care services (2008: 11,566; 2013: 12,693; 2019: 15,054).

**Outcome measures:** The number, proportion, and health and social characteristics of patients attached to near-retirement age comprehensive FPs over time; the number, proportion, and characteristics of near-retirement age comprehensive FPs over time. Secondary Outcome Measures: The characteristics of patients and their early- and mid-career comprehensive FPs.

**Results:** Patient attachment to comprehensive FPs increased over time. The overall FP workforce grew, but the proportion practicing comprehensiveness declined (2008: 77.2%, 2019: 70.7%). Over time, an increasing proportion of the comprehensive FP workforce was near retirement age. Correspondingly, an increasing proportion of patients were attached to near-retirement physicians. By 2019, 13.9% of comprehensive FPs were 65 years or older,

1  
2  
3 corresponding to 1,695,126 (14.8%) patients. Mean patient age increased, and all physicians  
4 served markedly increasing numbers of medically and socially complex patients.  
5  
6  
7

8 **Conclusions:** The primary care sector faces capacity challenges as both patients and physicians  
9 age and fewer physicians practice comprehensiveness. Nearly 15% (1.7 million) of Ontarians  
10 may lose their comprehensive FP to retirement between 2019 and 2025. To serve a growing,  
11 increasingly complex population, innovative solutions are needed.  
12  
13  
14  
15  
16  
17  
18  
19  
20

## 21 **STRENGTHS AND LIMITATIONS OF THIS STUDY**

- 22  
23  
24 • Our serial cross-sectional study uses large, population-level health administrative datasets  
25 to examine temporal trends in the needs of primary care patients who may soon lose their  
26 family physician (FP) to retirement, in turn informing future workforce planning.  
27  
28
- 29 • By distinguishing between FPs practicing comprehensive primary care and those who  
30 have narrowed their scope of practice, our methodology allows us to identify disparities  
31 between the presumed and actual primary care supply.  
32  
33
- 34 • By linking the characteristics, including age and sex, of the comprehensive primary care  
35 workforce to both the medical and social characteristics of the population served, our  
36 methodology facilitates a rich understanding of the resources needed by patients who  
37 may soon lose their FP to retirement, and the capacity to meet those needs among those  
38 who will remain in the workforce.  
39  
40
- 41 • Our methodology allows us to identify trends related to practice preferences among FPs  
42 that can be in turn applied to other data sources around primary care trainees and  
43 population growth.  
44  
45  
46  
47  
48  
49  
50  
51  
52  
53  
54  
55  
56  
57  
58  
59  
60

- 1  
2  
3  
4  
5  
6  
7  
8  
9  
10  
11  
12  
13  
14  
15  
16  
17  
18  
19  
20  
21  
22  
23  
24  
25  
26  
27  
28  
29  
30  
31  
32  
33  
34  
35  
36  
37  
38  
39  
40  
41  
42  
43  
44  
45  
46  
47  
48  
49  
50  
51  
52  
53  
54  
55  
56  
57  
58  
59  
60
- Limitations of this work include that our analyses predate the COVID-19 pandemic, due to limited data availability for more recent years, and that the number of comprehensive FPs in rural areas may be underestimated due to rural physician practice patterns possibly involving a large proportion of hospital-based services.

For peer review only

## INTRODUCTION

Primary care is the foundation of high-performing health care systems worldwide,<sup>1</sup> and can be defined by four core functions (“the 4 Cs”) articulated by Starfield and others: first *Contact* access to the healthcare system, *Continuity* (long-term person-focused care), *Comprehensiveness* (meeting the majority of each patient’s physical and mental health care needs, including prevention, acute care, chronic care, and multimorbidity care), and *Coordination* of care across the healthcare system, including specialty care, hospitals, home care, and community services and support.[1, 2] Access to primary care is associated with improved health outcomes, improved health equity, and reduced health system costs.[3-9]

An essential enabler of primary care access is an adequate health human resource (HHR) supply, but many jurisdictions are grappling with current and impending shortages. For example, 14.5% (4.6 million) Canadians are without a primary care provider.[10] Virtually every country worldwide is experiencing population aging,[11] with a high burden of medical complexity[12-15] and a HHR workforce that is aging into retirement.[16-18] Concurrently, many countries, including Canada, the United Kingdom, and the United States, are experiencing challenges attracting incoming physicians to primary care as a specialty,[19-22] and among those who do, a declining proportion are providing primary care reflective of Starfield’s “4 Cs” (hereafter referred to as “comprehensive primary care”); instead, primary care physicians are increasingly limiting their scope of work to subspecialized areas such as sports medicine, dermatology, or palliative care, or to episodic acute care settings, such as walk-in clinics.[23-29] Moreover, the concentration of women in primary care may further reduce HHR capacity, as women primary care physicians have been found to spend more time with patients[30] and receive more patient requests outside of appointments than men.[31, 32]

1  
2  
3 In the context of an aging population and shifting workforce demographics, HHR planning  
4 requires an understanding of the needs of patients who will soon lose their primary care provider  
5 due to retirement. To anticipate future need, previous studies often use high-level supply  
6 indicators such as number of primary care physicians, and high-level demand indicators such as  
7 patient visit rates and durations.[33-36] In-depth analyses tend to be limited to sub-jurisdictional  
8 populations, such as the neighborhood[36] or early career clinicians,[24] and do not directly link  
9 supply (individual clinicians) to demand (patients served by those clinicians).  
10  
11  
12  
13  
14  
15  
16  
17  
18  
19

20 We conducted an in-depth exploration linking supply and demand at a health system planning  
21 level in Ontario, Canada. We examined temporal trends in near-retirement primary care  
22 physician characteristics and the medical and social needs of patients attached to these  
23 physicians. We also examined early career and mid-career physician characteristics over time to  
24 understand this segment of the workforce's capacity to absorb the patients of near-retirement  
25 physicians. We explored hypothesis-generating differences in gender-based workforce trends,  
26 including differences in care provision,[30, 31] and trends around alternative practice models,  
27 such as interprofessional team-based care. As Canadian healthcare planning and delivery are  
28 within provincial jurisdiction, we focused on the province-level (Ontario). In Ontario, most  
29 comprehensive primary care is delivered by family physicians (FPs), most physician services and  
30 all permanent residents are covered by government insurance, and health services data are stored  
31 centrally in health administrative datasets.  
32  
33  
34  
35  
36  
37  
38  
39  
40  
41  
42  
43  
44  
45  
46  
47

## 48 **METHODS**

49

50  
51 The use of data in this study was authorized under section 45 of Ontario's Personal Health  
52 Information Protection Act (PHIPA) and did not require review by a research ethics board or  
53  
54  
55  
56  
57  
58  
59  
60



1  
2  
3 informed consent. This study is reported following the Strengthening the Reporting of  
4  
5 Observational Studies in Epidemiology (STROBE) reporting guideline.[37]  
6  
7

### 8 **Study design, population, and data sources**

9

10  
11 We conducted a serial cross-sectional population-level analysis. De-identified physician-level  
12  
13 and patient-level data came from nine databases which were linked using unique encoded  
14  
15 identifiers and analyzed at ICES (Supplemental eMethods). The study population included all  
16  
17 registered Ontario residents covered by the Ontario Health Insurance Plan (OHIP) at three time  
18  
19 points: March 31, 2008 (12,936,360), March 31, 2013 (13,447,365), and March 31, 2019  
20  
21 (14,388,566) and all Ontario physicians who billed primary care services (2008: 11,566; 2013:  
22  
23 12,693; 2019: 15,054).  
24  
25  
26  
27

### 28 **Outcomes and covariates**

29

30  
31 The primary outcomes were the number, proportion, and characteristics of patients attached to a  
32  
33 near-retirement age comprehensive FP over three time points, and the number, proportion, and  
34  
35 characteristics of near-retirement age comprehensive FPs over three time points. Physician  
36  
37 characteristics served as exploratory indicators of both existing supply and, for near-retirement  
38  
39 physicians, anticipated demand based on the populations of patients they serve. Patient  
40  
41 characteristics served as indicators of demand based on medical and sociodemographic  
42  
43 complexity.  
44  
45  
46  
47

48 Based on previous literature finding the average Ontario FP retires at age 70.5 years (with  
49  
50 women retiring on average 5 years earlier than men)[38] and accounting for the time needed to  
51  
52 train new physicians,[39] three different “near-retirement” physician age cut-points were  
53  
54 examined:  $\geq 55$  years,  $\geq 65$  years, and  $\geq 70$  years.  
55  
56  
57  
58  
59  
60

1  
2  
3 Comprehensive FPs were defined by applying a previously validated algorithm described below  
4  
5 in the Analysis section.[29] Detailed data source, cohort, and covariate definitions can be found  
6  
7 in the Supplemental eMethods.  
8  
9

## 10 **Analysis**

11  
12  
13 For our patient cohort, we created cross-sections of patients attached to comprehensive FPs at  
14  
15 three time points: 2008, 2013, 2019.  
16  
17

18  
19 We began by applying our previously validated algorithm for primary care physician  
20  
21 attachment[40] to the population of OHIP-registered Ontario residents; identifying patients  
22  
23 attached to a physician providing longitudinal primary care services based on billing codes and  
24  
25 physician-level continuity of care (see Supplemental eMethods – continuity of care). We  
26  
27 removed patients seen at Community Health Centres because they cannot be attached to a  
28  
29 specific physician, patients that the algorithm attached to non-FPs such as pediatricians and  
30  
31 surgeons, and patients attached to a FP with missing covariates.  
32  
33  
34

35  
36 We next created the cohort of FPs linked to the attached patients we identified (2008, 2013,  
37  
38 2019). We stratified our patient and FP cohorts by physician practice type (scope). For this, we  
39  
40 used a previously published algorithm for determining comprehensiveness of primary care  
41  
42 practice, where physicians are identified as providing comprehensive care if more than half of  
43  
44 their services were for core primary care and if these services fell into at least 7 of 22 activity  
45  
46 areas.[29] This resulted in four groups of patients with attachments to four types of FP practice  
47  
48 scopes: Comprehensive, Focused (for example, sports medicine or palliative care), Other, and  
49  
50 those who worked less than 44 days/year. The latter two practice categories were grouped  
51  
52  
53  
54  
55  
56  
57  
58  
59  
60

1  
2  
3 together as “Other”. Focusing on the “comprehensive FP” group, we described the characteristics  
4  
5 of these physicians and their patients.  
6  
7

8 Physician analyses were stratified by physician sex and physician age, including the three “near-  
9  
10 retirement” cut-points. Proportions and means with standard deviations were reported for each  
11  
12 time point (2008, 2013, 2019).  
13  
14  
15

### 16 **Patient and public involvement**

17  
18  
19 None.  
20  
21

## 22 **RESULTS**

### 23 **Patient cohort**

24  
25  
26  
27  
28 Excluding long-term care home residents, the population of OHIP-eligible Ontario residents in  
29  
30 the patient cohort over time was 12,863,036 (2008), 13,371,946 (2013), and 14,312,309 (2019),  
31  
32 of whom the following were attached to a comprehensive FP: 2008: n = 9,537,353 (77.3%);  
33  
34 2013: n = 10,398,003 (85.1%); 2019: n = 11,480,975 (86.1%) (Figure 1a).  
35  
36  
37

### 38 **Physician cohort**

39  
40  
41 The overall FP workforce grew from 9,944 physicians in 2008 to 13,269 in 2019 (Figure 1b, sum  
42  
43 of boxes 8 and 9).  
44  
45

46 A shift away from comprehensiveness and into other/focused scopes of practice (“non-  
47  
48 comprehensive”) was seen, with the proportion of all FPs practicing comprehensive primary care  
49  
50 declining from 77.2% in 2008 (n = 7,673) to 70.7% in 2019 (n = 9,377) (Supplemental eFigure  
51  
52 1). This was driven by declining comprehensiveness among mid-career and near-retirement  
53  
54 physician groups (age groups 45 and above). Over time, the proportion of younger physicians  
55  
56  
57  
58  
59  
60

1  
2  
3 (those under 45) practicing comprehensiveness was stable, albeit in lower proportions than their  
4 mid-career counterparts. In the oldest age group, a decreasing proportion practiced  
5 comprehensiveness (Supplemental eTable 1).  
6  
7  
8  
9

10 Supplemental eTable 2a and Supplemental eTable 2b focus specifically on the comprehensive FP  
11 workforce and stratify comprehensive FP data by age and sex. Career stage (years in practice)  
12 closely followed physician age group for both males and females, and the youngest cohort (age  
13 <35) comprised an increasing proportion of the comprehensive workforce over time, shifting  
14 from 7.7% in 2008 to 15.1% in 2019. The older cohorts were also found to comprise an  
15 increasing proportion of the comprehensive workforce over time, and the absolute numbers of  
16 older physicians increased.  
17  
18  
19  
20  
21  
22  
23  
24  
25  
26

### 27 **Temporal trends for near-retirement comprehensive FPs and their patients**

28  
29  
30 When looking at our three near-retirement cut-points (55+, 65+, 70+) over time, an increasing  
31 proportion of the comprehensive FP workforce was near retirement age (Figure 2).  
32  
33

34 Correspondingly, an increasing proportion of patients were attached to near-retirement  
35 comprehensive FPs (Table 1). Between 2008 and 2019, FPs in the 55+ age group represented a  
36 growing proportion of all comprehensive FPs, increasing from 35.7% to 38.2%. In 2019, this  
37 corresponded to 3,586 physicians and 4,935,992 (43.0%) patients (2019). The proportion of  
38 comprehensive FPs in the 65+ group increased from 10.0% in 2008 to 13.9% in 2019 (1,307  
39 physicians, 1,695,126 (14.8%) patients). the proportion of comprehensive FPs in the 70+ age  
40 group increased from 4.6% in 2008 to 6.4% in 2019 (599 physicians, 666,000 (5.8%) patients).  
41  
42  
43  
44  
45  
46  
47  
48  
49  
50  
51  
52  
53  
54  
55  
56  
57  
58  
59  
60

**Table 1.** Characteristics of patients attached to near-retirement comprehensive family physicians over time, by near-retirement group

| Patient Characteristics                                                                                               |      | Age 55+ Comprehensive FPs |      | Age 65+ Comprehensive FPs |      | Age 70+ Comprehensive FPs |      |
|-----------------------------------------------------------------------------------------------------------------------|------|---------------------------|------|---------------------------|------|---------------------------|------|
|                                                                                                                       |      | N                         | %    | N                         | %    | N                         | %    |
| <b>OVERALL</b><br>(N, % of patients attached to near-retirement physician group)                                      | 2008 | 3,571,661                 | 37.5 | 690,642                   | 7.2  | 214,861                   | 2.3  |
|                                                                                                                       | 2013 | 4,676,625                 | 45.0 | 1,399,119                 | 13.5 | 419,172                   | 4.0  |
|                                                                                                                       | 2019 | 4,935,992                 | 43.0 | 1,695,126                 | 14.8 | 666,404                   | 5.8  |
| <b>Aged 65+</b><br>(N, % of patients attached to near-retirement physician group)                                     | 2008 | 597,707                   | 16.7 | 136,394                   | 19.8 | 45,414                    | 21.1 |
|                                                                                                                       | 2013 | 846,974                   | 18.1 | 298,545                   | 21.3 | 95,833                    | 22.8 |
|                                                                                                                       | 2019 | 1,003,769                 | 20.3 | 402,430                   | 23.7 | 176,473                   | 26.5 |
| <b>Female patients</b><br>(N, % of patients attached to near-retirement physician group)                              | 2008 | 1,804,585                 | 50.5 | 338,656                   | 49.0 | 103,386                   | 48.1 |
|                                                                                                                       | 2013 | 2,371,923                 | 50.7 | 678,971                   | 48.5 | 201,104                   | 48.0 |
|                                                                                                                       | 2019 | 2,498,453                 | 50.6 | 823,090                   | 48.6 | 317,967                   | 47.7 |
| <b>Rural patients (RIO score 40+)</b><br>(N, % of patients attached to near-retirement physician group)               | 2008 | 233,045                   | 6.5  | 48,860                    | 7.1  | 14,323                    | 6.7  |
|                                                                                                                       | 2013 | 292,357                   | 6.3  | 88,311                    | 6.3  | 20,294                    | 4.8  |
|                                                                                                                       | 2019 | 274,099                   | 5.6  | 83,691                    | 4.9  | 33,545                    | 5.0  |
| <b>Highest (4+) RUB</b><br>(N, % of patients attached to near-retirement physician group)                             | 2008 | 677,436                   | 19.0 | 137,995                   | 20.0 | 44,067                    | 20.5 |
|                                                                                                                       | 2013 | 878,340                   | 18.8 | 283,013                   | 20.2 | 88,182                    | 21.0 |
|                                                                                                                       | 2019 | 983,818                   | 19.9 | 350,439                   | 20.7 | 146,298                   | 22.0 |
| <b>Highest (5+) annual core primary care visits</b><br>(N, % of patients attached to near-retirement physician group) | 2008 | 2,109,950                 | 59.1 | 403,026                   | 58.4 | 127,050                   | 59.1 |
|                                                                                                                       | 2013 | 2,462,236                 | 52.7 | 753,388                   | 53.9 | 227,090                   | 54.2 |
|                                                                                                                       | 2019 | 2,480,395                 | 50.3 | 876,487                   | 51.7 | 346,668                   | 52.0 |
| <b>COPD</b><br>(N, % of patients attached to near-retirement physician group)                                         | 2008 | 233,498                   | 6.5  | 51,856                    | 7.5  | 16,411                    | 7.6  |
|                                                                                                                       | 2013 | 326,748                   | 7.0  | 115,669                   | 8.3  | 37,477                    | 8.9  |
|                                                                                                                       | 2019 | 337,202                   | 6.8  | 132,395                   | 7.8  | 59,350                    | 8.9  |
| <b>CHF</b><br>(N, % of patients attached to near-retirement physician group)                                          | 2008 | 69,573                    | 2.0  | 15,645                    | 2.3  | 4,952                     | 2.3  |
|                                                                                                                       | 2013 | 80,026                    | 1.7  | 28,187                    | 2.0  | 9,214                     | 2.2  |
|                                                                                                                       | 2019 | 90,436                    | 1.8  | 35,567                    | 2.1  | 15,832                    | 2.4  |
| <b>Diabetes</b><br>(N, % of patients attached to near-retirement physician group)                                     | 2008 | 327,127                   | 9.2  | 68,392                    | 9.9  | 21,389                    | 10.0 |
|                                                                                                                       | 2013 | 506,014                   | 10.8 | 170,115                   | 12.2 | 52,815                    | 12.5 |
|                                                                                                                       | 2019 | 555,358                   | 11.3 | 215,696                   | 12.7 | 92,395                    | 13.9 |

|                                                                                                                                    |      |           |      |         |      |         |      |
|------------------------------------------------------------------------------------------------------------------------------------|------|-----------|------|---------|------|---------|------|
| <b>Frailty</b><br><b>(N, % of patients attached to near-retirement physician group)</b>                                            | 2008 | 66,559    | 1.9  | 14,875  | 2.2  | 4,964   | 2.3  |
|                                                                                                                                    | 2013 | 98,490    | 2.1  | 33,005  | 2.4  | 10,794  | 2.6  |
|                                                                                                                                    | 2019 | 114,085   | 2.3  | 43,032  | 2.5  | 18,597  | 2.8  |
| <b>Any mental health illness in last 2 years</b><br><b>(N, % of patients attached to near-retirement physician group)</b>          | 2008 | 825,520   | 23.1 | 166,257 | 24.1 | 51,802  | 24.1 |
|                                                                                                                                    | 2013 | 979,987   | 21.0 | 311,771 | 22.3 | 96,543  | 23.0 |
|                                                                                                                                    | 2019 | 1,022,523 | 20.7 | 355,911 | 21.0 | 150,153 | 22.5 |
| <b>Lowest income quintile</b><br><b>(N, % of patients attached to near-retirement physician group)</b>                             | 2008 | 706,504   | 19.8 | 150,381 | 21.8 | 48,403  | 22.5 |
|                                                                                                                                    | 2013 | 876,982   | 18.8 | 282,922 | 20.2 | 91,236  | 21.8 |
|                                                                                                                                    | 2019 | 944,888   | 19.1 | 348,869 | 20.6 | 142,881 | 21.4 |
| <b>Highest housing instability quintile</b><br><b>(N, % of patients attached to near-retirement physician group)</b>               | 2008 | 761,397   | 21.3 | 165,525 | 24.0 | 54,275  | 25.6 |
|                                                                                                                                    | 2013 | 934,472   | 20.0 | 295,059 | 21.1 | 92,653  | 22.2 |
|                                                                                                                                    | 2019 | 1,031,506 | 20.9 | 374,322 | 22.1 | 155,859 | 23.4 |
| <b>Highest material deprivation quintile</b><br><b>(N, % of patients attached to near-retirement physician group)</b>              | 2008 | 736,903   | 20.6 | 163,835 | 23.7 | 52,733  | 24.9 |
|                                                                                                                                    | 2013 | 1,045,136 | 22.4 | 338,012 | 24.2 | 112,097 | 26.9 |
|                                                                                                                                    | 2019 | 926,043   | 18.8 | 352,849 | 20.8 | 145,084 | 21.8 |
| <b>Highest neighborhood ethnic concentration quintile</b><br><b>(N, % of patients attached to near-retirement physician group)</b> | 2008 | 962,252   | 26.9 | 177,586 | 25.7 | 63,167  | 29.8 |
|                                                                                                                                    | 2013 | 1,335,124 | 28.6 | 397,430 | 28.4 | 124,062 | 29.8 |
|                                                                                                                                    | 2019 | 1,521,975 | 30.8 | 584,512 | 34.5 | 213,182 | 32.0 |
| <b>Recent immigrant</b><br><b>(N, % of patients attached to near-retirement physician group)</b>                                   | 2008 | 269,131   | 7.5  | 52,717  | 7.6  | 21,202  | 10.9 |
|                                                                                                                                    | 2013 | 289,772   | 6.2  | 83,484  | 6.0  | 27,024  | 7.0  |
|                                                                                                                                    | 2019 | 277,755   | 5.6  | 82,560  | 4.9  | 28,449  | 4.3  |

Interpretation of Table 1 rows:

Interpretation of the "Overall" category: For example, in 2019, 1,695,126 patients were attached to a comprehensive FP aged 65+. This represents 14.8% of all patients who are attached to a comprehensive FP.

Interpretation of each patient category: For example, in 2019, of the 666,404 patients attached to comprehensive FPs over the age of 70 years, 28,449 (4.3%) were recent immigrants.

FPs: family physicians. RIO: Rurality Index of Ontario. RUB: morbidity, based on resource utilization band. COPD: chronic obstructive pulmonary disease. CHF: congestive heart failure.

## Temporal characteristics of comprehensive FPs and their patients

### *Comprehensive FP capacity/workload*

Supplemental eTable 2b shows the mean (SD) roster size for the total population of comprehensive FPs remained consistent over time (2008: 1213 (927); 2013: 1272 (909); 2019: 1209 (837)). Male FPs had consistently larger roster sizes in each age group and at each time point. Both male and female FP roster sizes followed an inverted U pattern with FP age, with practice sizes starting and ending smaller at the extremes of FP age and peaking during mid-career. This pattern was observed at all three time points. That said, male and female older (65+) physicians and younger (<35) physicians cared for larger roster sizes over time.

Working full time equivalent (FTE) also followed an inverted U pattern according to FP age (Supplemental eTable 2b). Consistently, two thirds of the overall comprehensive FP workforce practiced FTE, with males comprising the majority of FTE physicians. Older physicians increasingly practiced FTE (age 65-69, 2008: 58.4%, 2013: 67.0%, 2019: 72.6%; age 70+, 2008: 32.0%, 2013: 41.6%, 2019: 54.6%), a trend that was driven by an increasing proportion of female FTE comprehensive FPs. Among younger physicians, by 2019, females comprised the majority of FTE workforce (52.2% of FTE comprehensive FPs <35 years; 55.2% of FTE comprehensive FPs 35-44 years).

Mean (SD) annual core primary care visits provided per patient declined over time (Supplemental eTable 2b): 2008: 7.3 (3.1) visits; 2013: 6.5 (2.6) visits; 2019: 6.0 (2.3) visits. In most comprehensive FP age groups, male and females provided similar numbers of annual visits. Older physicians provided more annual visits compared with their younger counterparts.

1  
2  
3 In the patient cohort (Table 1), at all near-retirement physician cut-offs (55+, 65+, 70+), a  
4 declining proportion over time made a high number (5+) primary care visits in the preceding  
5 year, but these proportions remained consistently over 50% in all near-retirement groups and at  
6 each time point.  
7  
8  
9  
10  
11  
12

### 13 ***Comprehensive FP practice settings***

14  
15  
16 A declining proportion of comprehensive FPs over time practiced in fee-for-service (FFS)  
17 models of care, with alternate payment plan models (APPs), specifically capitation and team-  
18 based models of care, becoming increasingly common (Supplemental eFigure 2). In these APP  
19 models, physician compensation is primarily a lump sum payment per attached patient, with or  
20 without additional government funding for support for interdisciplinary health professionals  
21 (“teams”) such as nurses, nurse practitioners, social workers, and dietitians. In 2008, most  
22 comprehensive FPs worked in FFS-based models (76.6%), but by 2019, most practiced in APPs  
23 (55.4%) (Supplemental eFigure 2, Supplemental eTable 3). Correspondingly, an increasing  
24 proportion of patients were served in APP models: 2008: 26.5% (n = 2,526,116); 2013: 54.3% (n  
25 = 5,643,862); 2019: 61.5% (n = 7,064,109).  
26  
27  
28  
29  
30  
31  
32  
33  
34  
35  
36  
37  
38  
39

40 Over time, a stable majority of comprehensive FPs practiced in large urban and urban settings  
41 (Supplemental eTable 4A). Trends around age and sex of rural comprehensive FPs resembled  
42 trends seen in the overall comprehensive FP population (Supplemental eTables 4B, 4C).  
43  
44  
45  
46

### 47 ***Patient complexity***

48  
49  
50 The mean age (SD) of comprehensive FPs’ patients increased over time (Supplemental eTable  
51 2b): 2008: 33.5 (13.2) years; 2013: 36.5 (12.1) years; 2019: 38.1 (12.0) years. When stratified by  
52 physician age and sex, each physician age group served increasingly older patients. Male  
53  
54  
55  
56  
57  
58  
59  
60



1  
2  
3 physicians cared for slightly older patients than did females in each physician age group and at  
4  
5 each time point.  
6  
7

8 The number and proportion of patients aged 65 and older increased over time in each near-  
9  
10 retirement group (Table 1). This number nearly quadrupled in the oldest (70+ years) FP group  
11  
12 (2008: N = 45,414, 2019: N = 176,473).  
13  
14  
15

16 Over time, an increasing proportion of comprehensive FPs' practices were comprised of the  
17  
18 highest morbidity patients (Resource Utilization Band (RUB) 4+): 2008: 16.5%; 2013: 18.1%;  
19  
20 2019: 19.8% (Supplemental eTable 5). Concordantly, as seen in Table 1, the number and  
21  
22 proportion of highest morbidity patients attached to near-retirement physicians grew over time.  
23  
24 By 2019, 983,818 patients in the highest morbidity category were attached to a physician aged  
25  
26 55+, representing 19.9% of all patients attached to a 55+ physician. 350,439 were attached to a  
27  
28 65+ physician (20.7% of patients attached to a 65+ physician). 146,298 were attached to a 70+  
29  
30 physician (22.0% of patients attached to 70+ a physician), representing a tripling of the absolute  
31  
32 number.  
33  
34  
35  
36

37 While proportions of patients with chronic illness (COPD, CHF, diabetes, frailty, mental illness)  
38  
39 remained relatively stable over time, the absolute numbers increased markedly in each near-  
40  
41 retirement group (Table 1).  
42  
43  
44

45 The proportions and means of socially complex patients cared for within each comprehensive FP  
46  
47 age and sex group increased over time for most indicators (Supplemental eTable 5) and,  
48  
49 concordantly, the number of higher social complexity patients increased markedly over time for  
50  
51 most near-retirement groups (Table 1).  
52  
53

## 54 55 **DISCUSSION**

56  
57  
58  
59  
60

1  
2  
3 In our population-level serial cross-sectional analyses, the number and proportion of patients  
4 attached to a comprehensive FP in Ontario, Canada, grew over time. However, reflective of  
5 population-level workforce trends,[16] we found an increasing proportion of the comprehensive  
6 FP workforce is nearing retirement. Given the average FP retires at age 70.5 years,[38] we  
7 anticipate that between 2019 and 2025, nearly 1.7 million Ontarians may lose their current  
8 comprehensive FP to retirement.  
9

10 This number may be an underestimate. Half of all comprehensive FPs are now female, and  
11 female FPs retire on average 5 years earlier than males.[38] Further, due to limitations in data  
12 availability for more recent years, our analyses predate the COVID-19 pandemic, and surveys  
13 from Ontario indicate the pandemic has hastened retirement plans, with almost double the usual  
14 proportion of FPs closing their offices during the pandemic (3%, compared with the usual rate of  
15 1.6%/year),[41] and one in five indicating an intention to retire within five years.[42]  
16

17 Although modelling the future capacity of the comprehensive FP workforce was outside the  
18 scope of this study, several findings from this study may help inform such modeling. Aligned  
19 with previous research,[29] a declining proportion of FPs are practicing comprehensive family  
20 medicine. Two thirds of comprehensive FPs are practicing full-time. Reflective of a generally  
21 aging population, comprehensive FPs cared for increasingly older groups of patients with  
22 increasing medical and social complexity over time. Females, who comprised an increasing  
23 proportion of the comprehensive FP workforce, served smaller roster sizes than males, which  
24 may reflect that a lower proportion of female physicians practiced FTE compared with males.  
25

26 Modeling may also consider other variables not examined in this study, such as the net number  
27 of FPs added to the workforce each year (in Ontario, this has averaged 333 per year over the last  
28 10 years (2013-2022)[43]), the ranking of family medicine as first choice discipline by medical  
29  
30  
31  
32  
33  
34  
35  
36  
37  
38  
39  
40  
41  
42  
43  
44  
45  
46  
47  
48  
49  
50

1  
2  
3 school graduates (in Ontario and other jurisdictions, this has declined in recent years[20-22, 44]),  
4  
5 and population growth.[45]  
6  
7

8 Solutions to FP workforce shortages identified in the literature focus on addressing deterrents to  
9  
10 the practice of comprehensive primary care, including perceived poor respect for primary care as  
11  
12 a profession, inadequate compensation, inadequate training supports for developing and  
13  
14 maintaining comprehensive skills, and inadequate administrative and interprofessional health  
15  
16 supports to manage increasing patient complexity.[21, 24, 46-50] Our finding of a shift toward  
17  
18 APP models underscores the desire among comprehensive FPs for financial stability and the  
19  
20 support of an interprofessional team. Further, we identified equity concerns that relate to the  
21  
22 large numbers of patients with chronic diseases and complex social needs, all of which are highly  
23  
24 amenable to team-based care.[51-53] Concerningly, as of 2019, we found that 47% of older  
25  
26 (65+) physicians still practiced in the less popular FFS models of care, serving 761,648 patients;  
27  
28 these FFS practices may be less desirable to incoming physicians looking to take over a retiring  
29  
30 physician's practice.  
31  
32  
33  
34  
35

36 In some jurisdictions, the response to primary care workforce shortages has included expanding  
37  
38 the scope of practice for non-physician health professionals. For example, several provinces in  
39  
40 Canada, including Ontario, now allow pharmacists to prescribe for minor common ailments.  
41  
42 However, concerns have been raised around inadequate concurrent investments in  
43  
44 comprehensive, team-based primary care (rather than episodic, siloed care), the disruption of  
45  
46 continuity for those who do have primary care access, limited pharmacist training in clinical  
47  
48 diagnosis, and the lack of high-quality evidence around cost-effectiveness and health  
49  
50 outcomes.[54, 55] Both the U.S. and Canada have increased nurse practitioner- or physician  
51  
52 assistant-led primary care. However, a recent U.S. study found that primary care delivered by  
53  
54  
55  
56  
57  
58  
59  
60

1  
2  
3 non-physician practitioners was more costly than care delivered by physicians,[56] and accurate  
4 cost comparisons in Canada remain a challenge due to the lack of publicly available data on non-  
5 physician overhead spending.  
6  
7  
8  
9

10 There are some limitations to our study. The FTE indicator is based on physician billings,  
11 thereby excluding time spent on non-billable administrative work. Almost half of Canadian FPs  
12 report 10-19 hours per week of administrative tasks,[57] so the indicator may underestimate  
13 workload, and thus the number of FTE FPs. Rural FPs often practice in both primary care and  
14 hospital settings;[58] since the comprehensiveness algorithm is based on primary care  
15 billings,[29] it may underestimate the number of rural comprehensive FPs. Further, the rurality  
16 index scores and methodology have not been updated since 2008 despite the significant  
17 population growth and municipal-level changes that have occurred since then. Some physician  
18 analyses could not be fully stratified by both age and sex due to small cell sizes. Community  
19 Health Centre patients are not included and we did not examine other clinicians who may  
20 provide primary care; however, these clinicians are the main primary care source for only a small  
21 minority (approximately 1%) of Ontarians.[59, 60] Finally, our analyses do not account for the  
22 rise of virtual care and its potential impact on capacity.[61-63]  
23  
24  
25  
26  
27  
28  
29  
30  
31  
32  
33  
34  
35  
36  
37  
38  
39  
40

## 41 **CONCLUSIONS**

42  
43  
44 Primary care faces many capacity challenges as physicians age into retirement and fewer choose  
45 to enter or remain in comprehensive practice. Incentives and supports are needed to grow the  
46 comprehensive FP workforce to serve a growing and increasingly complex patient population.  
47  
48  
49  
50  
51  
52  
53  
54  
55  
56  
57  
58  
59  
60

1  
2  
3 **Contributors:** Kamila Premji, Michael E Green, Richard H Glazier, and Bridget L Ryan  
4  
5 conceived the study concept and design. Kamila Premji, Michael E Green, Richard H Glazier,  
6  
7 Shahriar Khan, Susan E Schultz, Maria Mathews, Steve Nastos, Eliot Frymore, and Bridget L  
8  
9 Ryan participated in the acquisition and interpretation of data. Kamila Premji, Shahriar Khan,  
10  
11 Bridget L Ryan, Michael E Green, and Richard H Glazier contributed to the statistical analysis of  
12  
13 the acquired data. Kamila Premji drafted the manuscript. All authors critically revised the  
14  
15 contents of the manuscript, approved the final version to be submitted for publication, and agreed  
16  
17 to be accountable for all aspects of the work with respect to its accuracy and integrity. Michael E  
18  
19 Green and Richard H Glazier obtained funding to support this research. Eliot Frymire and  
20  
21 Shahriar Khan provided administrative and technical support. Bridget L Ryan and Maria  
22  
23 Mathews provided supervision for this project.  
24  
25  
26  
27  
28

29 **Acknowledgements:** We would like to acknowledge Monisha Kabir for her assistance in  
30  
31 preparing the final submission.  
32  
33

34 **Competing interests:** None declared.  
35  
36

37 **Funding:** This study was supported by the INSPIRE PHC (Innovations Strengthening Primary  
38  
39 Health Care Through Research) Research Program (#693), which is funded through the Health  
40  
41 Systems Research Program of the Ontario Ministry of Health (MOH) and the Ontario Ministry of  
42  
43 Long-term Care (MLTC). It was also supported by ICES, which is funded by an annual grant  
44  
45 from the Ontario MOH and MLTC. Dr. Premji was also supported by the PhD Family Medicine  
46  
47 program at the University of Western Ontario, and by the Junior Clinical Research Chair in  
48  
49 Family Medicine at the Department of Family Medicine, University of Ottawa.  
50  
51  
52  
53  
54  
55  
56  
57  
58  
59  
60

1  
2  
3 **Role of the funding source:** The funders and supporters had no role in the design and conduct  
4 of the study; collection, management, analysis, and interpretation of the data; preparation,  
5 review, or approval of the manuscript; and decision to submit the manuscript for publication.  
6  
7  
8  
9

10  
11 **Disclaimer:** The analyses, conclusions, opinions, and statements expressed herein are solely  
12 those of the authors and do not reflect those of the funding or data sources; no endorsement is  
13 intended or should be inferred.  
14  
15  
16  
17

18  
19 **Additional information:** Parts of this material are based on data and/or information compiled  
20 and provided by CIHI and Cancer Care Ontario (CCO). The analyses, conclusions, opinions and  
21 statements expressed herein are solely those of the authors and do not reflect those of the data  
22 sources; no endorsement is intended or should be inferred.  
23  
24  
25  
26  
27

28  
29 **Data availability statement:** The data sets from this study are held securely in coded form at  
30 ICES. Data-sharing agreements prohibit ICES from making the data sets publicly available, but  
31 access may be granted to those who meet pre-specified criteria for confidential access, available  
32 at [www.ices.on.ca/DAS](http://www.ices.on.ca/DAS). The complete data set creation plan, and underlying analytic code are  
33 available from the authors upon request, understanding that the programs may rely upon coding  
34 templates or macros unique to ICES.  
35  
36  
37  
38  
39  
40  
41  
42  
43  
44  
45  
46  
47  
48  
49  
50  
51  
52  
53  
54  
55  
56  
57  
58  
59  
60

## REFERENCES

1. Starfield B, Shi L, Macinko J. Contribution of primary care to health systems and health. *Milbank Q* 2005;83(3):457-502. doi: 10.1111/j.1468-0009.2005.00409.x
2. O'Malley AS, Rich EC, Maccarone A, DesRoches CM, Reid RJ. Disentangling the Linkage of Primary Care Features to Patient Outcomes: A Review of Current Literature, Data Sources, and Measurement Needs. *J Gen Intern Med* 2015;30(Suppl 3):S576-85. doi: 10.1007/s11606-015-3311-9
3. Basu S, Berkowitz SA, Phillips RL, Bitton A, Landon BE, Phillips RS. Association of Primary Care Physician Supply With Population Mortality in the United States, 2005-2015. *JAMA Intern Med* 2019;179(4):506-14. doi: 10.1001/jamainternmed.2018.7624
4. Bazemore A, Petterson S, Peterson LE, Bruno R, Chung Y, Phillips RL, Jr. Higher Primary Care Physician Continuity is Associated With Lower Costs and Hospitalizations. *Ann Fam Med* 2018;16(6):492-7. doi: 10.1370/afm.2308
5. McAlister FA, Bakal JA, Green L, Bahler B, Lewanczuk R. The effect of provider affiliation with a primary care network on emergency department visits and hospital admissions. *CMAJ* 2018;190(10):E276-E84. doi: 10.1503/cmaj.170385
6. Pereira Gray DJ, Sidaway-Lee K, White E, Thorne A, Evans PH. Continuity of care with doctors—a matter of life and death? A systematic review of continuity of care and mortality. *BMJ Open* 2018;8(6):e021161. doi: 10.1136/bmjopen-2017-021161
7. Organisation for Economic Co-operation and Development (OECD). *OECD Health Policy Studies: Realising the Potential of Primary Health Care*. OECD Publishing; 2020.
8. National Health Service (NHS) England. Next steps on the NHS Five Year Forward View: Primary Care [online]. 2017. <https://www.england.nhs.uk/five-year-forward-view/next-steps-on-the-nhs-five-year-forward-view/primary-care/> (accessed March 3, 2023).
9. Vallejo-Torres L, Morris S. Primary care supply and quality of care in England. *Eur J Health Econ* 2018;19(4):499-519. doi: 10.1007/s10198-017-0898-2
10. Statistics Canada. Primary Health Care Providers, 2019 [online]. 2020. <https://www150.statcan.gc.ca/n1/pub/82-625-x/2020001/article/00004-eng.pdf> (accessed March 3, 2023).
11. United Nations Department of Economic and Social Affairs Population Division. *World Population Ageing 2019: Highlights* [online]. 2019. <https://www.un.org/development/desa/pd/sites/www.un.org.development.desa.pd/files/files/documents/2020/Jan/worldpopulationageing2019-highlights.pdf> (accessed March 9, 2023).
12. Kudesia P, Salimrouny B, Stanley M, Fortin M, Stewart M, Terry A, et al. The incidence of multimorbidity and patterns in accumulation of chronic conditions: A systematic review. *J Multimorb Comorb* 2021;11:26335565211032880. doi: 10.1177/26335565211032880
13. Ryan BL, Allen B, Zwarenstein M, Stewart M, Glazier RH, Fortin M, et al. Multimorbidity and mortality in Ontario, Canada: A population-based retrospective cohort study. *J Comorb* 2020;10:2235042X20950598. doi: 10.1177/2235042X20950598
14. Rosella L, Kornas K, Huang A, Bornbaum C, Henry D, Wodchis WP. Accumulation Of Chronic Conditions At The Time Of Death Increased In Ontario From 1994 To 2013. *Health Aff* 2018;37(3):464-72. doi: 10.1377/hlthaff.2017.1150
15. Koné Pefoyo AJ, Bronskill SE, Gruneir A, Calzavara A, Thavorn K, Petrosyan Y, et al. The increasing burden and complexity of multimorbidity. *BMC Public Health* 2015;15:415. doi: 10.1186/s12889-015-1733-2
16. Statistics Canada. In the Midst of High Job Vacancies and Historically Low Unemployment, Canada Faces Record Retirements from an Aging Labour Force [online]. 2022. <https://www150.statcan.gc.ca/n1/daily-quotidien/220427/dq220427a-eng.pdf> (accessed March 9, 2023).
17. Cristea M, Noja GG, Stefea P, Sala AL. The Impact of Population Aging and Public Health Support on EU Labor Markets. *Int J Environ Res Public Health* 2020;17(4). doi: 10.3390/ijerph17041439



18. Willis J, Antono B, Bazemore A, Jetty A. The State of Primary Care in the United States: A Chartbook of Facts and Statistics [online]. 2020. <https://www.graham-center.org/content/dam/rgc/documents/publications-reports/reports/PrimaryCareChartbook2021.pdf> (accessed August 24, 2023).
19. Canadian Resident Matching Service (CaRMS). CaRMS R-1 Data and Reports. R-1 Match Reports [online]. 2022. <https://www.carms.ca/data-reports/r1-data-reports/> (accessed August 24, 2022).
20. The American Academy of Family Physicians. 2022 Match Results for Family Medicine [online]. 2022. [https://www.aafp.org/content/dam/AAFP/documents/medical\\_education\\_residency/the\\_match/AAFP-2022-Match-Results-for-Family-Medicine.pdf](https://www.aafp.org/content/dam/AAFP/documents/medical_education_residency/the_match/AAFP-2022-Match-Results-for-Family-Medicine.pdf) (accessed August 24, 2022).
21. Alberti H, Banner K, Collingwood H, Merritt K. 'Just a GP': a mixed method study of undermining of general practice as a career choice in the UK. *BMJ Open* 2017;7(11):e018520. doi: 10.1136/bmjopen-2017-018520
22. Lambert TW, Smith F, Goldacre MJ. Trends in attractiveness of general practice as a career: surveys of views of UK-trained doctors. *Br J Gen Pract* 2017;67(657):e238-e47. doi: 10.3399/bjgp17X689893
23. Freeman TR, Boisvert L, Wong E, Wetmore S, Maddocks H. Comprehensive practice: Normative definition across 3 generations of alumni from a single family practice program, 1985 to 2012. *Can Fam Physician* 2018;64(10):750-9.
24. Kabir M, Randall E, Mitra G, Lavergne MR, Scott I, Snadden D, et al. Resident and early-career family physicians' focused practice choices in Canada: a qualitative study. *Br J Gen Pract* 2022;72(718):e334-e41. doi: 10.3399/BJGP.2021.0512
25. Lavergne MR, Scott I. The "kids" are alright: Practice patterns among early career family physicians and implications for primary care policy and workforce planning. Department of Family Medicine Rounds; University of British Columbia, BC, Canada: Department of Family Medicine, University of British Columbia; 2022.
26. Reitz R, Horst K, Davenport M, Klemmetsen S, Clark M. Factors Influencing Family Physician Scope of Practice: A Grounded Theory Study. *Fam Med* 2018;50(4):269-74. doi: 10.22454/FamMed.2018.602663
27. Chan BTB. The declining comprehensiveness of primary care. *CMAJ* 2002;166(4):429-34.
28. Coutinho AJ, Cochrane A, Stelter K, Phillips RL, Peterson LE. Comparison of intended scope of practice for family medicine residents with reported scope of practice among practicing family physicians. *JAMA* 2015;314(22):2364. doi: 10.1001/jama.2015.13734
29. Schultz SE, Glazier RH. Identification of physicians providing comprehensive primary care in Ontario: a retrospective analysis using linked administrative data. *CMAJ Open* 2017;5(4):E856-E63. doi: 10.9778/cmajo.20170083
30. Ganguli I, Sheridan B, Gray J, Chernew M, Rosenthal MB, Neprash H. Physician Work Hours and the Gender Pay Gap - Evidence from Primary Care. *N Engl J Med* 2020;383(14):1349-57. doi: 10.1056/NEJMsa2013804
31. Rittenberg E, Liebman JB, Rexrode KM. Primary Care Physician Gender and Electronic Health Record Workload. *J Gen Intern Med* 2022;37(13):3295-301. doi: 10.1007/s11606-021-07298-z
32. Pelley E, Carnes M. When a Specialty Becomes "Women's Work": Trends in and Implications of Specialty Gender Segregation in Medicine. *Academic Medicine* 2020;95(10):1499-506. doi: 10.1097/acm.0000000000003555
33. Glied S, Ma S. How Will the Affordable Care Act Affect the Use of Health Care Services? Issue Briefs: The Commonwealth Fund; 2015. p. 1-15.
34. Petterson SM, Liaw WR, Phillips RL, Jr., Rabin DL, Meyers DS, Bazemore AW. Projecting US primary care physician workforce needs: 2010-2025. *Ann Fam Med* 2012;10(6):503-9. doi: 10.1370/afm.1431
35. Rao A, Shi Z, Ray KN, Mehrotra A, Ganguli I. National Trends in Primary Care Visit Use and Practice Capabilities, 2008-2015. *Ann Fam Med* 2019;17(6):538-44. doi: 10.1370/afm.2474



- 1  
2  
3 36. Bourgeault IL, Chamberland-Rowe C, Simkin S. Co-developing an integrated primary care  
4 workforce planning approach at a regional level: overarching framework and guiding principles. *Hum*  
5 *Resour Health* 2021;19(1):87. doi: 10.1186/s12960-021-00578-z
- 6 37. von Elm E, Altman DG, Egger M, Pocock SJ, Gøtzsche PC, Vandenbroucke JP, et al. The  
7 Strengthening the Reporting of Observational Studies in Epidemiology (STROBE) Statement: guidelines  
8 for reporting observational studies. *Int J Surg* 2014;12(12):1495-9. doi: 10.1016/j.ijsu.2014.07.013
- 9 38. Simkin S, Dahrouge S, Bourgeault IL. End-of-career practice patterns of primary care physicians  
10 in Ontario. *Can Fam Physician* 2019;65(5):e221-e30.
- 11 39. Working Group on Postgraduate Curriculum Review TCoFPoCC. Length of Training in the Core  
12 Family Medicine Residency. Mississauga, ON, Canada 2012.
- 13 40. Jaakkimainen L, Bayoumi I, Glazier RH, Premji K, Kiran T, Khan S, et al. Development and  
14 validation of an algorithm using health administrative data to define patient attachment to primary care  
15 providers. *J Health Organ Manag* 2021;ahead-of-print(ahead-of-print):733-43. doi: 10.1108/JHOM-05-  
16 2020-0171
- 17 41. Kiran T, Green ME, Wu CF, Kopp A, Latifovic L, Frymire E, et al. Family Physicians Stopping  
18 Practice During the COVID-19 Pandemic in Ontario, Canada. *Ann Fam Med* 2022;20(5):460-3. doi:  
19 10.1370/afm.2865
- 20 42. Kiran T, Wang R, Handford C, Laraya N, Eissa A, Pariser P, et al. Keeping doors open: A cross-  
21 sectional survey of family physician practice patterns during COVID-19, needs, and intentions. *medRxiv*  
22 2021:2021.12.20.21267918. doi: 10.1101/2021.12.20.21267918
- 23 43. Ontario Physician Reporting Centre. Physicians in Ontario [online]. 2023.  
24 <https://physicianreporting.org/pio/> (accessed November 9, 2023).
- 25 44. Canadian Resident Matching Service (CaRMS). R-1 data and reports: Discipline choice of  
26 Canadian applicants [online]. 2022. <https://www.carms.ca/data-reports/r1-data-reports/> (accessed  
27 September 1, 2022).
- 28 45. Immigration, Refugees and Citizenship Canada. Notice – Supplementary Information for the  
29 2023-2025 Immigration Levels Plan [online]. 2022. [https://www.canada.ca/en/immigration-refugees-  
30 citizenship/news/notices/supplementary-immigration-levels-2023-2025.html](https://www.canada.ca/en/immigration-refugees-citizenship/news/notices/supplementary-immigration-levels-2023-2025.html) (accessed September 15,  
31 2023).
- 32 46. Kost A, Bentley A, Phillips J, Kelly C, Prunuske J, Morley CP. Graduating Medical Student  
33 Perspectives on Factors Influencing Specialty Choice: An AAFP National Survey. *Fam Med*  
34 2019;51(2):129-36. doi: 10.22454/FamMed.2019.136973
- 35 47. Mahood SC. Medical education: Beware the hidden curriculum. *Can Fam Physician*  
36 2011;57(9):983-5.
- 37 48. Porter J, Boyd C, Skandari MR, Laiteerapong N. Revisiting the Time Needed to Provide Adult  
38 Primary Care. *J Gen Intern Med* 2023;38(1):147-55. doi: 10.1007/s11606-022-07707-x
- 39 49. The College of Family Physicians of Canada (CFPC). Preparing Our Future Family Physicians:  
40 An educational prescription for strengthening health care in changing times [online]. 2022.  
41 <https://www.cfpc.ca/CFPC/media/Resources/Education/AFM-OTP-Report.pdf> (accessed September 1,  
42 2023).
- 43 50. Bazemore A, Grunert T. Sailing the 7C's: Starfield Revisited as a Foundation of Family Medicine  
44 Residency Redesign.
- 45 51. Kiran T, Kopp A, Moineddin R, Glazier RH. Longitudinal evaluation of physician payment  
46 reform and team-based care for chronic disease management and prevention. *CMAJ* 2015;187(17):E494-  
47 E502. doi: 10.1503/cmaj.150579
- 48 52. Chen PG, Mehrotra A, Auerbach DI. Do we really need more physicians? Responses to predicted  
49 primary care physician shortages. *Med Care* 2014;52(2):95-6. doi: 10.1097/mlr.000000000000046
- 50 53. McMurchy D, Astles R. Final Report: An External Evaluation of the Family Health Team (FHT)  
51 Initiative [online]. 2014. <https://www.researchgate.net/publication/273866011> (accessed March 9, 2023).
- 52 54. Ontario College of Family Physicians. Advocacy Alert [online]. 2023. <https://conta.cc/3stjST9>  
53 (accessed September 15, 2023).
- 54  
55  
56  
57  
58  
59  
60

- 1  
2  
3 55. Babashahi S, Carey N, Jani Y, Hart K, Hounsoume N. Costs, consequences and value for money in  
4 non-medical prescribing: a scoping review. *BMJ Open* 2023;13(5):e067907. doi: 10.1136/bmjopen-2022-  
5 067907
- 6 56. Batson B, Crosby S, Fitzpatrick J. Mississippi Frontline - Targeting Value-based Care with  
7 Physician-led Care Teams. *Journal of The Mississippi State Medical Association* 2022;63(1):1-21.
- 8 57. Canadian Medical Association (CMA). CMA 2021 National Physician Health Survey [online].  
9 2022. [https://www.cma.ca/sites/default/files/2022-08/NPHS\\_final\\_report\\_EN.pdf](https://www.cma.ca/sites/default/files/2022-08/NPHS_final_report_EN.pdf) (accessed March 9,  
10 2023).
- 11 58. Chan B, Schultz S. Supply and Utilization of General Practitioner and Family Physician Services  
12 in Ontario. ICES; 2005.
- 13 59. Stukel TA, Glazier RH, Schultz SE, Guan J, Zagorski BM, Gozdyra P, et al. Multispecialty  
14 physician networks in Ontario. *Open Med* 2013;7(2):e40-55.
- 15 60. Nurse Practitioner Association of Ontario. Nurse Practitioners' Association of Ontario and Nurse  
16 Practitioner-led Clinic Association supports "Vision for Tomorrow" report [online]. 2022.  
17 [https://npao.org/nurse-practitioners-association-of-ontario-and-nurse-practitioner-led-clinic-association-  
18 supports-vision-for-tomorrow-report/](https://npao.org/nurse-practitioners-association-of-ontario-and-nurse-practitioner-led-clinic-association-supports-vision-for-tomorrow-report/) (accessed September 12, 2022).
- 19 61. Bavafa H, Hitt LM, Terwiesch C. The Impact of E-Visits on Visit Frequencies and Patient  
20 Health: Evidence from Primary Care. *Manage Sci* 2018;64(12):5461-80. doi: 10.1287/mnsc.2017.2900
- 21 62. Ashwood JS, Mehrotra A, Cowling D, Uscher-Pines L. Direct-To-Consumer Telehealth May  
22 Increase Access To Care But Does Not Decrease Spending. *Health Aff* 2017;36(3):485-91. doi:  
23 10.1377/hlthaff.2016.1130
- 24 63. Asch DA. The hidden economics of telemedicine. *Ann Intern Med* 2015;163(10):801-2. doi:  
25 10.7326/M15-1416  
26  
27  
28  
29  
30  
31  
32  
33  
34  
35  
36  
37  
38  
39  
40  
41  
42  
43  
44  
45  
46  
47  
48  
49  
50  
51  
52  
53  
54  
55  
56  
57  
58  
59  
60

1  
2  
3 **FIGURE TITLES**  
4  
5  
6

7 **Figure 1.** Cohort creation: Patients (a) and physicians (b)  
8

9 **Figure 2.** Comprehensive family physicians by near-retirement group, year, and sex  
10 Total Ns (all comprehensive family physicians) for 2008, 2013, and 2019 are 7,673, 8,050, and  
11 9,377, respectively.  
12  
13  
14  
15  
16  
17  
18  
19  
20  
21  
22  
23  
24  
25  
26  
27  
28  
29  
30  
31  
32  
33  
34  
35  
36  
37  
38  
39  
40  
41  
42  
43  
44  
45  
46  
47  
48  
49  
50  
51  
52  
53  
54  
55  
56  
57  
58  
59  
60

For peer review only

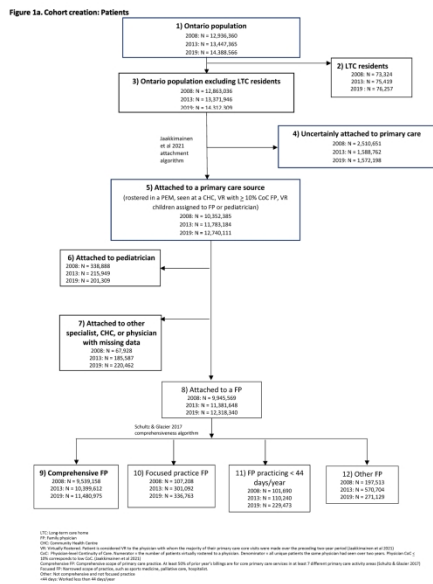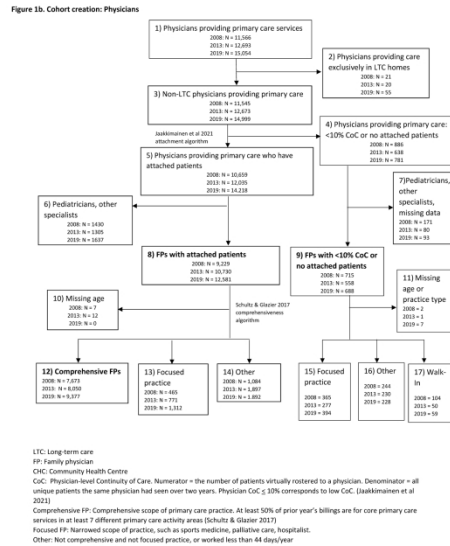

Figure 1a. Cohort creation: Patients. Figure 1b. Cohort creation: Physicians

431x279mm (300 x 300 DPI)

1  
2  
3  
4  
5  
6  
7  
8  
9  
10  
11  
12  
13  
14  
15  
16  
17  
18  
19  
20  
21  
22  
23  
24  
25  
26  
27  
28  
29  
30  
31  
32  
33  
34  
35  
36  
37  
38  
39  
40  
41  
42  
43  
44  
45  
46  
47  
48  
49  
50  
51  
52  
53  
54  
55  
56  
57  
58  
59  
60

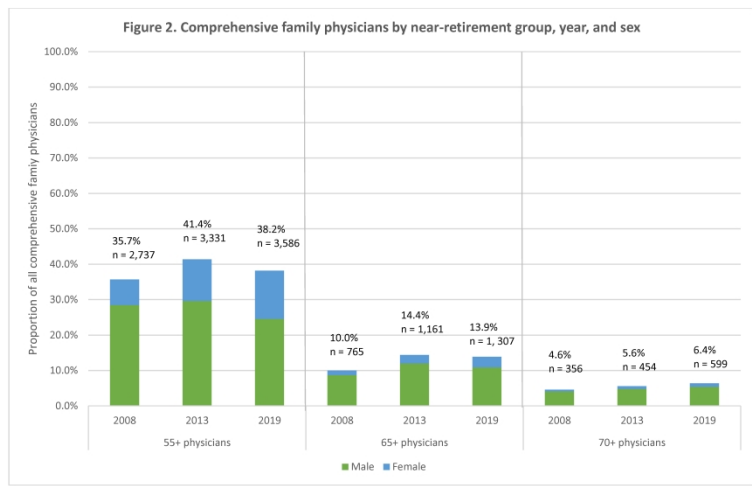

Total Ns (all comprehensive family physicians):  
 2008: 7,673  
 2013: 8,050  
 2019: 9,377

Comprehensive family physicians by near-retirement group, year, and sex  
 279x215mm (600 x 600 DPI)

## Supplemental eMethods. Data sources, cohort definitions, and variable definitions

We obtained study data from population-level, de-identified, linked health administrative databases housed at ICES. ICES is an independent, non-profit research institute whose legal status under Ontario's health information privacy law allows it to collect and analyze healthcare and demographic data, without consent, for health system evaluation and improvement. Secure access to these data is governed by policies and procedures that are approved by the Information and Privacy Commissioner of Ontario. In 2018, the institute formerly known as the Institute for Clinical Evaluative Sciences formally adopted the initialism ICES as its official name. This change acknowledges the growth and evolution of the organization's research since its inception in 1992, while retaining the familiarity of the former acronym within the scientific community and beyond.

The dataset from this study is held securely in coded form at ICES. While legal data sharing agreements between ICES and data providers (e.g., healthcare organizations and government) prohibit ICES from making the dataset publicly available, access may be granted to those who meet pre-specified criteria for confidential access, available at [www.ices.on.ca/DAS](http://www.ices.on.ca/DAS) (email: [das@ices.on.ca](mailto:das@ices.on.ca)). The full dataset creation plan and underlying analytic code are available from the authors upon request, understanding that the computer programs may rely upon coding templates or macros that are unique to ICES and are therefore either inaccessible or may require modification.

These datasets were linked using unique encoded identifiers and analyzed at ICES.

The index date for each covariate was the fiscal year-end for each time point: March 31, 2008, March 31, 2013, March 31, 2019.

Physician-level data came from the ICES Physician Database (age, sex, years in practice, practice specialty, practice type, full-time equivalence), the Primary Care Population database (geographic location, roster size, primary care model), and Ontario Health Insurance Plan (OHIP) billings (health services rendered). For physicians for whom birth month and date were missing, we imputed physician age based on birth year, with fiscal year end (March 31) as the index date. Physician gender is not available in ICES data, so physician sex was used instead, available as male and female.

Patient-level data came from the Registered Persons Database (age, sex, postal code, immigration status), the Client Agency Program Enrolment (CAPE) database (primary care enrolment model), the Community Health Centre database (CHC) (patients receiving health services at CHCs, which serve vulnerable patients), census data holdings (income quintiles and other marginalization indices), OHIP database (health services claims and associated diagnoses), Discharge Abstract Database linkages with OHIP (mental health diagnosis), and Johns Hopkins Adjusted Clinical Groups (frailty, resource utilization band).

Resource Utilization Bands (RUB): This was measured using the Johns Hopkins Adjusted Clinical Groups (ACG) Version 10.0. The RUB measure assesses expected health care use as a measure of patient complexity/morbidity.

Annual number of core primary care visits were based on activity billing codes for 22 primary care service types in the 12 months preceding the index date.

Rurality: We measured rurality using the practice postal code and the Rurality Index for Ontario (RIO) scoring methodology,<sup>1</sup> with the following categories: Large urban (score 0), Urban (score 1-9), Small Urban/Suburban (score 10–39), and Rural/Remote (score  $\geq 40$ ).

Full-time equivalency (FTE): FTE was calculated based on payments from all sources, with a 40th percentile cut-point corresponding with a FTE of 1.0.

Chronic diseases (COPD, CHF, Diabetes): These were measured using validated cohorts at ICES. The algorithm used to define cohorts varies slightly for each chronic condition, based on the original ICES algorithm for diabetes (i.e., two physician claims or one hospital admission with diabetes within two years). These disease cohorts are cumulative over time.

Frailty: This was measured using the Johns Hopkins Adjusted Clinical Groups (ACG) Version 10.0 frailty defining diagnoses indicator, which captures patients with multidimensional frailty at the population level and is based on 10 clusters of frailty defining dimensions: Malnutrition, dementia, impaired vision, decubitus ulcer, incontinence of urine, loss of weight, poverty, barriers to access to care, difficulty in walking, and falls. The indicator has been demonstrated to accurately identify patients with limitations in activities of daily living.

Mental illness: The case definition algorithm to identify patients with a mental health diagnosis over the last two years links two databases at ICES: The Discharge Abstract Databases (DAD) and OHIP. It is based on having two physician billing claims in OHIP over 2 years or one hospitalization with one of the listed mental health service codes (ICD9/ICD10).

Marginalization: We assessed three dimensions of marginalization (residential instability, material deprivation, and neighborhood ethnic concentration) using the Ontario Marginalization Index,<sup>2</sup> a census-derived geographically-based index.

Physician-level continuity of care (CoC): The algorithm considers patients to be virtually attached a primary care physician if they received the majority of their primary care over the preceding 2-year period from a physician with greater than 10% physician-level continuity of care (CoC). Physician-level CoC is a visit-based measure of the proportion of an individual physician visits over all physician's visits over a two-year time period. The numerator is the number of patients virtually attached to a physician, and the denominator is all unique patients the same physician had seen over two years. If the physician CoC is less than or equal to 10%, then this physician had a low CoC.

## References:

1. Kralj B. *Measuring 'Rurality' for Purposes of Health-Care Planning: An Empirical Measure for Ontario.*; 2009.
2. Matheson F, Moloney G, van Ingen T, Public Health Ontario. *2016 Ontario Marginalization Index: User Guide, 1st Revision.*; 2022. <https://www.publichealthontario.ca/-/media/documents/o/2017/on-marg->

1  
2  
3  
4  
5  
6  
7  
8  
9  
10  
11  
12  
13  
14  
15  
16  
17  
18  
19  
20  
21  
22  
23  
24  
25  
26  
27  
28  
29  
30  
31  
32  
33  
34  
35  
36  
37  
38  
39  
40  
41  
42  
43  
44  
45  
46  
47  
48  
49  
50  
51  
52  
53  
54  
55  
56  
57  
58  
59  
60

userguide.pdf?la=en

For peer review only



Supplemental eFigure 1. Proportion of all family physicians practicing comprehensiveness by year, age, and sex

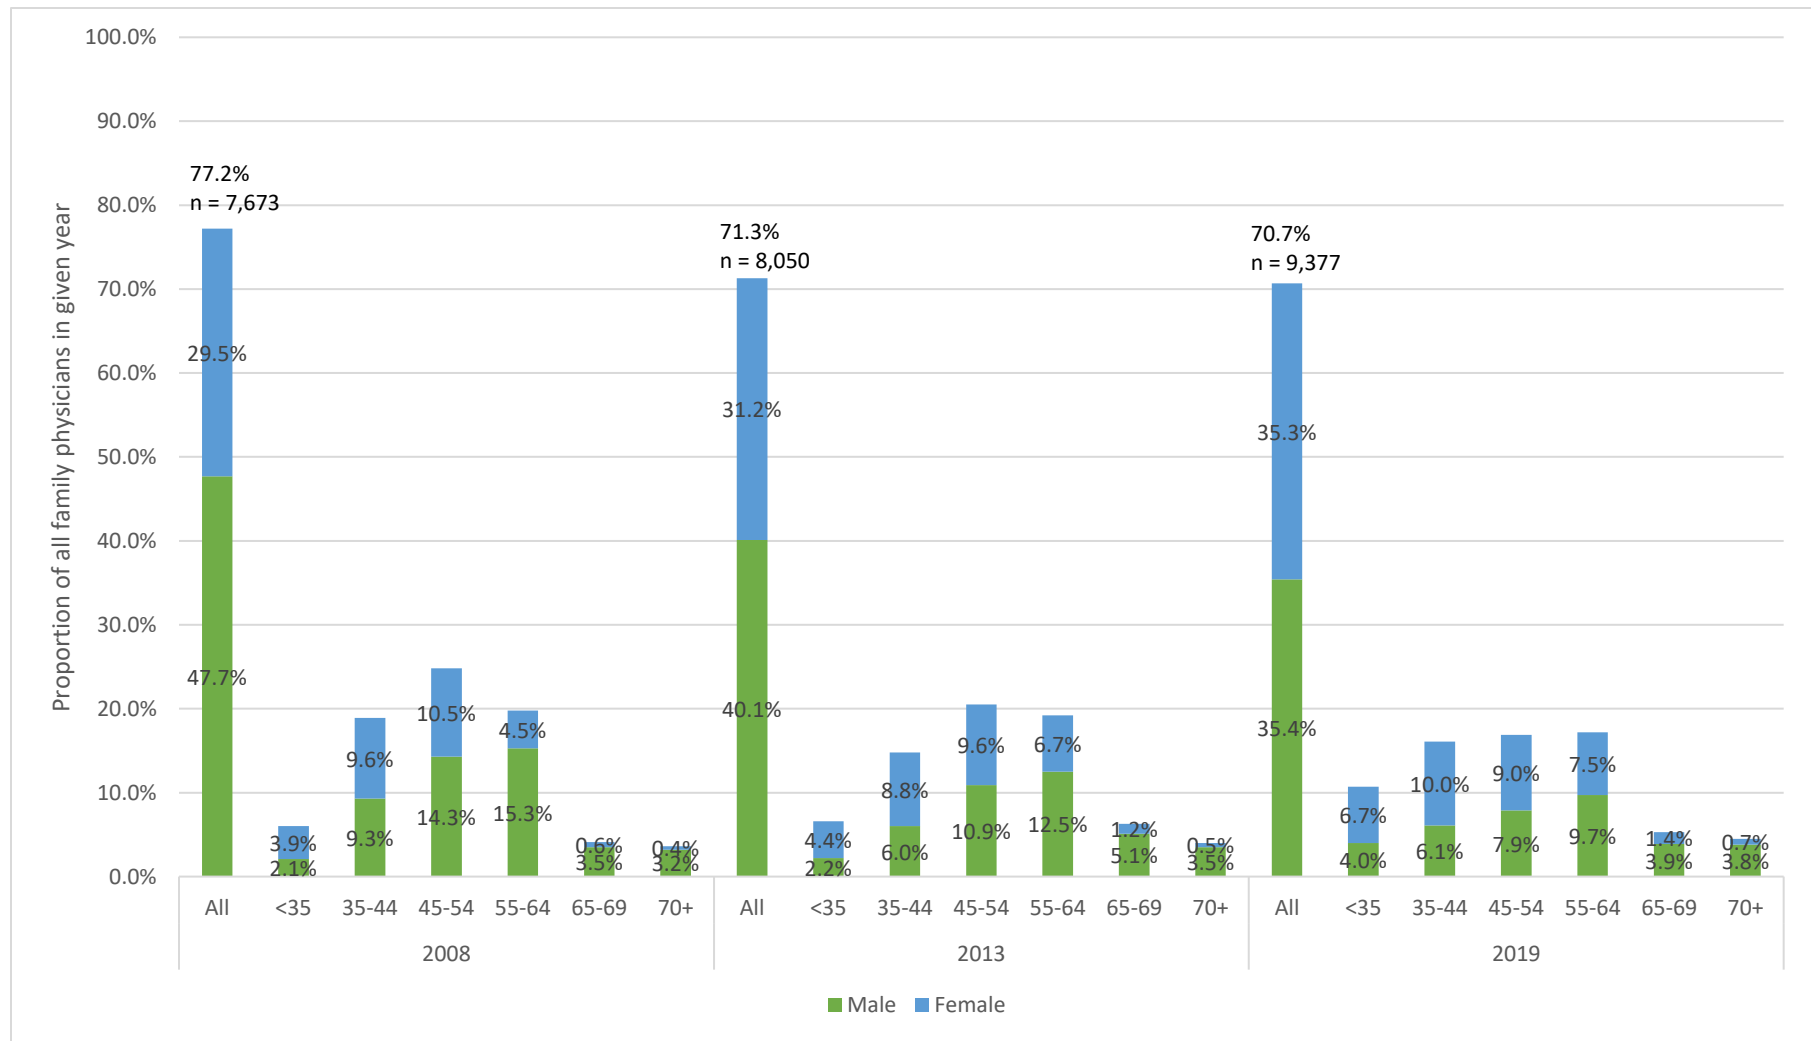

Total Ns (all family physicians): 2008: 9,944; 2013: 11,288; 2019: 13,269

Missing age for the age stratifications by year: 2008 = 9; 2013 = 13; 2019 = 7

Example of interpretation for bars labeled "All": Of all family physicians in the 2008 cohort, 29.5% are females practicing comprehensiveness.

1  
2  
3 Example of interpretation for age-stratification bars: Of all family physicians in the 2008 cohort, the proportion who were female, under age 35  
4 years, and practicing comprehensiveness is 3.9%.  
5  
6  
7  
8  
9

10  
11  
12  
13  
14  
15  
16  
17  
18  
19  
20  
21  
22  
23  
24  
25  
26  
27  
28  
29  
30  
31  
32  
33  
34  
35  
36  
37  
38  
39  
40  
41  
42  
43  
44  
45  
46  
47

For peer review only

**Supplemental eFigure 2. Proportion of comprehensive family physicians in various practice models by year**

Total Ns (all comprehensive family physicians): 2008: 7,673; 2013: 8,050; 2019: 9,377

CAP/FHT: Alternate payment plan (APP) model where physician payments are mainly capitation (CAP)-based (annual amount per enrolled patient, adjusted for patient age and sex), with or without additional funding for interdisciplinary team members (Family Health Team (FHT)) such as nurse practitioners and social workers

EFFS/NOG: Fee-for-service payment models. EFFS = fee-for-service payments with enrolment requirements and some pay enhancements, such as higher payments for enrolled patients and bonus payments for meeting preventive care targets. NOG = No group; traditional fee-for-service payments with no enrolment requirements or payment enhancements.

Supplemental eTable 1. Comprehensive family physicians by physician age

|                                   | <35 years |         |       |                           |                                   |        | 35-44 years |         |       |                             |                                     |  | 45-54 years |         |       |                             |                                     |  | 55-64 years |         |       |                             |                                     |  | 65-69 years |         |        |                             |                                     |  | 70+ years |         |       |                           |                                   |  | All  |         |                 |             |                               |                           |  |  |  |  |       |  |  |  |  |  |  |
|-----------------------------------|-----------|---------|-------|---------------------------|-----------------------------------|--------|-------------|---------|-------|-----------------------------|-------------------------------------|--|-------------|---------|-------|-----------------------------|-------------------------------------|--|-------------|---------|-------|-----------------------------|-------------------------------------|--|-------------|---------|--------|-----------------------------|-------------------------------------|--|-----------|---------|-------|---------------------------|-----------------------------------|--|------|---------|-----------------|-------------|-------------------------------|---------------------------|--|--|--|--|-------|--|--|--|--|--|--|
|                                   | Comp      | Noncomp | Total | % of <35 FPs who are comp | % of all FPs who are comp and <35 |        | Comp        | Noncomp | Total | % of 35-44 FPs who are comp | % of all FPs who are comp and 35-44 |  | Comp        | Noncomp | Total | % of 45-54 FPs who are comp | % of all FPs who are comp and 45-54 |  | Comp        | Noncomp | Total | % of 55-64 FPs who are comp | % of all FPs who are comp and 55-64 |  | Comp        | Noncomp | Total  | % of 65-69 FPs who are comp | % of all FPs who are comp and 65-69 |  | Comp      | Noncomp | Total | % of 70+ FPs who are comp | % of all FPs who are comp and 70+ |  | Comp | Noncomp | Total - all FPs | Missing age | Total - all including missing | % of all FPs who are comp |  |  |  |  |       |  |  |  |  |  |  |
| 2008                              | 592       | 305     | 897   | 66.0%                     | 6.0%                              |        | 1877        | 652     | 2529  | 74.2%                       | 18.9%                               |  | 2467        | 581     | 3048  | 80.9%                       | 24.8%                               |  | 1972        | 430     | 2402  | 82.1%                       | 19.8%                               |  | 409         | 133     | 542    | 75.5%                       | 4.1%                                |  | 356       | 161     | 517   | 68.9%                     | 3.6%                              |  | 7673 | 2262    | 9935            | 9           | 9944                          | 77.2%                     |  |  |  |  |       |  |  |  |  |  |  |
| 2013                              | 741       | 503     | 1244  | 59.6%                     | 6.6%                              |        | 1666        | 755     | 2421  | 68.8%                       | 14.8%                               |  | 2312        | 708     | 3020  | 76.6%                       | 20.5%                               |  | 2170        | 615     | 2785  | 77.9%                       | 19.2%                               |  | 707         | 278     | 985    | 71.8%                       | 6.3%                                |  | 454       | 366     | 820   | 55.4%                     | 4.0%                              |  | 8050 | 3225    | 11275           | 13          | 11288                         | 71.3%                     |  |  |  |  |       |  |  |  |  |  |  |
| 2019                              | 1414      | 697     | 2111  | 67.0%                     | 10.7%                             |        | 2135        | 827     | 2962  | 72.1%                       | 16.1%                               |  | 2242        | 716     | 2958  | 75.8%                       | 16.9%                               |  | 2279        | 757     | 3036  | 75.1%                       | 17.2%                               |  | 708         | 374     | 1082   | 65.4%                       | 5.3%                                |  | 599       | 514     | 1113  | 53.8%                     | 4.5%                              |  | 9377 | 3885    | 13262           | 7           | 13269                         | 70.7%                     |  |  |  |  |       |  |  |  |  |  |  |
| Relative Change (2019/2008)       |           |         |       |                           |                                   |        |             |         |       |                             |                                     |  |             |         |       |                             |                                     |  |             |         |       |                             |                                     |  |             |         |        |                             |                                     |  |           |         |       |                           |                                   |  |      |         |                 |             |                               |                           |  |  |  |  |       |  |  |  |  |  |  |
| Absolute Change (2019 minus 2008) |           |         |       |                           |                                   | 101.5% | 179.0%      |         |       |                             |                                     |  | 97.1%       | 85.2%   |       |                             |                                     |  |             | 93.6%   | 68.1% |                             |                                     |  |             |         | 86.7%  | 129.7%                      |                                     |  |           |         |       | 78.2%                     | 126.1%                            |  |      |         |                 |             |                               |                           |  |  |  |  | 91.6% |  |  |  |  |  |  |
|                                   |           |         |       |                           |                                   | 1.0%   | 4.7%        |         |       |                             |                                     |  | -2.1%       | -2.8%   |       |                             |                                     |  |             | -5.1%   | -7.9% |                             |                                     |  |             |         | -10.0% | 1.2%                        |                                     |  |           |         |       | -15.0%                    | 0.9%                              |  |      |         |                 |             |                               |                           |  |  |  |  | -6.5% |  |  |  |  |  |  |

Comp: Comprehensive FPs  
Noncomp: Non-comprehensive FPs

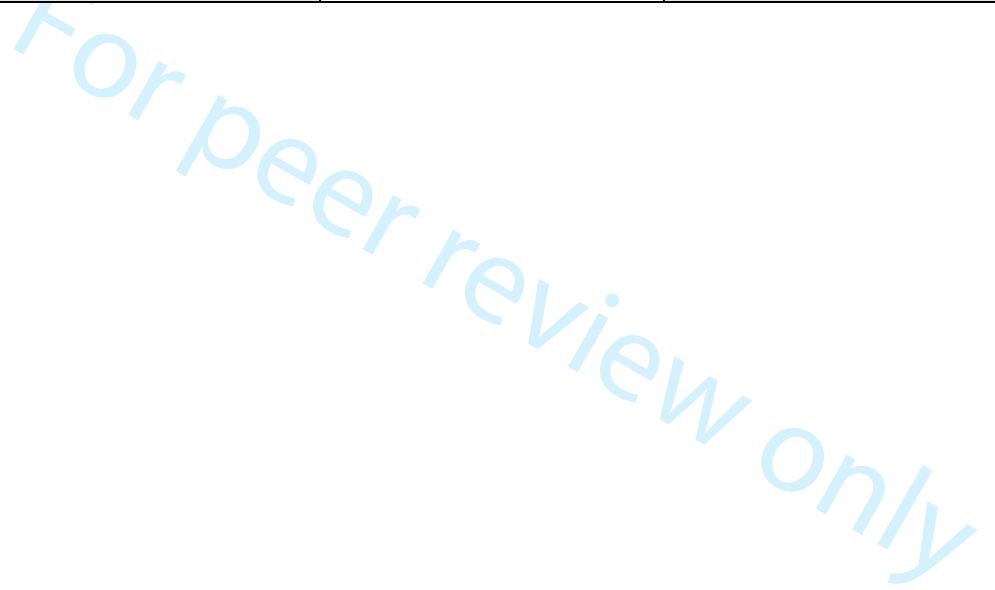

Supplemental eTable 2a. Comprehensive family physicians by physician age and sex

|                  |      | <35 Years   |            |            | 35-44 Years |            |             | 45-54 Years |             |             | 55-64 Years |             |            | 65-69 Years |            |            | 70+ Years |            |           | Total Comprehensive FPs |             |             |
|------------------|------|-------------|------------|------------|-------------|------------|-------------|-------------|-------------|-------------|-------------|-------------|------------|-------------|------------|------------|-----------|------------|-----------|-------------------------|-------------|-------------|
|                  |      | Total       | M          | F          | Total       | M          | F           | Total       | M           | F           | Total       | M           | F          | Total       | M          | F          | Total     | M          | F         | Total                   | M           | F           |
| Comp. FPs N (%*) | 2008 | 592 (7.7)   | 211 (35.6) | 381 (64.4) | 1877 (24.5) | 922 (49.1) | 955 (50.9)  | 2467 (32.2) | 1422 (57.6) | 1045 (42.4) | 1972 (25.7) | 1522 (77.2) | 450 (22.8) | 409 (5.3)   | 347 (84.8) | 62 (15.2)  | 356 (4.6) | 319 (89.6) | 37 (10.4) | 7673 (100.0)            | 4743 (61.8) | 2930 (38.2) |
|                  | 2013 | 741 (9.2)   | 245 (33.1) | 496 (66.9) | 1666 (20.7) | 674 (40.5) | 992 (59.5)  | 2312 (28.7) | 1227 (53.1) | 1085 (46.9) | 2170 (27.0) | 1415 (65.2) | 755 (34.8) | 707 (8.8)   | 576 (81.5) | 131 (18.5) | 454 (5.6) | 392 (86.3) | 62 (13.7) | 8050 (100.0)            | 4529 (56.3) | 3521 (43.7) |
|                  | 2019 | 1414 (15.1) | 528 (37.3) | 886 (62.7) | 2135 (22.8) | 806 (37.8) | 1329 (62.2) | 2242 (23.9) | 1048 (46.7) | 1194 (53.3) | 2279 (24.3) | 1290 (56.6) | 989 (43.4) | 708 (7.6)   | 519 (73.3) | 189 (26.7) | 599 (6.4) | 505 (84.3) | 94 (15.7) | 9377 (100.0)            | 4696 (50.1) | 4681 (49.9) |

\*The “%” in the “Total” columns represents the proportion of all comprehensive FPs who belong to that age group. The “%” in the “M” and “F” columns represents the proportion who are male or female within that age group.

Supplemental eTable 2b. Practice characteristics of comprehensive family physicians by physician age and sex

|                             |      | <35 Years      |                |                | 35-44 Years     |                 |                 | 45-54 Years     |                  |                 | 55-64 Years     |                 |                 | 65-69 Years     |                 |                 | 70+ Years       |                 |                | All Comprehensive FPs |                 |                 |
|-----------------------------|------|----------------|----------------|----------------|-----------------|-----------------|-----------------|-----------------|------------------|-----------------|-----------------|-----------------|-----------------|-----------------|-----------------|-----------------|-----------------|-----------------|----------------|-----------------------|-----------------|-----------------|
|                             |      | Total          | M              | F              | Total           | M               | F               | Total           | M                | F               | Total           | M               | F               | Total           | M               | F               | All             | M               | F              | All                   | M               | F               |
| Years in pract. (mean (SD)) | 2008 | 6.0 (±2.3)     | 6.3 (±2.3)     | 5.9 (±2.2)     | 14.4 (±3.9)     | 14.7 (±3.8)     | 14.1 (±3.9)     | 23.7 (±4.2)     | 23.8 (±4.2)      | 23.5 (±4.2)     | 33.4 (±4.4)     | 33.6 (±4.2)     | 32.8 (±4.8)     | 41.3 (±3.0)     | 41.2 (±3.0)     | 42.0 (±3.2)     | 48.0 (±5.1)     | 48.0 (±4.9)     | 47.8 (±6.4)    | 24.6 (±11.4)          | 27.3 (±11.2)    | 20.2 (±10.1)    |
|                             | 2013 | 5.7 (±2.1)     | 5.4 (±2.1)     | 5.9 (±2.1)     | 13.8 (±4.2)     | 14.0 (±4.2)     | 13.7 (±4.1)     | 23.9 (±4.2)     | 23.9 (±4.0)      | 23.8 (±4.4)     | 33.2 (±4.4)     | 33.6 (±4.4)     | 32.5 (±4.5)     | 41.2 (±3.5)     | 41.1 (±3.4)     | 41.6 (±4.0)     | 48.7 (±4.9)     | 48.7 (±4.9)     | 49.0 (±4.9)    | 25.6 (±12.3)          | 28.8 (±12.1)    | 21.4 (±11.1)    |
|                             | 2019 | 5.8 (±2.0)     | 5.7 (±2.0)     | 5.8 (±1.9)     | 12.5 (±4.2)     | 12.5 (±4.4)     | 12.5 (±4.0)     | 23.7 (±4.7)     | 23.9 (±4.7)      | 23.5 (±4.6)     | 33.3 (±4.7)     | 33.4 (±4.5)     | 33.2 (±4.9)     | 40.8 (±3.6)     | 41.0 (±3.4)     | 40.3 (±4.0)     | 48.5 (±5.1)     | 48.4 (±5.3)     | 48.7 (±4.1)    | 23.7 (±13.4)          | 27.0 (±13.8)    | 20.3 (±12.0)    |
| Roster size (mean (SD))     | 2008 | 638.3 (±622.5) | 790.7 (±722.0) | 553.9 (±542.7) | 1131.8 (±873.2) | 1323.5 (±981.3) | 946.7 (±707.0)  | 1345.1 (±920.7) | 1470.3 (±996.7)  | 1174.6 (±774.4) | 1432.1 (±945.2) | 1494.0 (±961.5) | 1222.7 (±856.4) | 1123.1 (±955.5) | 1186.1 (±981.7) | 770.7 (±701.1)  | 566.3 (±770.9)  | 584.9 (±785.4)  | 406.5 (±618.7) | 1212.8 (±927.0)       | 1338.8 (±991.1) | 1008.8 (±770.0) |
|                             | 2013 | 620.0 (±605.9) | 725.2 (±690.9) | 568.0 (±552.6) | 1152.8 (±836.0) | 1348.6 (±935.1) | 1019.7 (±732.6) | 1407.1 (±927.1) | 1567.8 (±1013.4) | 1225.4 (±780.2) | 1490.2 (±894.6) | 1593.1 (±937.6) | 1297.2 (±772.4) | 1366.1 (±905.8) | 1420.3 (±921.3) | 1128.0 (±794.3) | 898.1 (±895.7)  | 946.7 (±922.9)  | 591.1 (±622.7) | 1272.1 (±909.2)       | 1425.0 (±975.2) | 1075.4 (±773.4) |
|                             | 2019 | 734.0 (±644.2) | 834.7 (±712.0) | 674.0 (±592.4) | 1074.5 (±720.3) | 1217.2 (±841.6) | 987.9 (±620.1)  | 1394.8 (±876.2) | 1529.3 (±946.5)  | 1276.7 (±791.2) | 1405.6 (±847.2) | 1531.6 (±902.2) | 1241.1 (±738.3) | 1434.4 (±900.5) | 1502.5 (±932.8) | 1247.6 (±777.3) | 1098.0 (±804.3) | 1125.7 (±815.1) | 949.2 (±729.6) | 1208.9 (±837.4)       | 1351.9 (±908.8) | 1065.4 (±731.6) |
| Core PC visits (mean (SD))  | 2008 | 6.2 (±2.7)     | 6.2 (±2.8)     | 6.2 (±2.7)     | 7.3 (±4.2)      | 7.5 (±5.6)      | 7.2 (±2.3)      | 7.3 (±2.3)      | 7.4 (±2.5)       | 7.3 (±2.1)      | 7.7 (±2.6)      | 7.7 (±2.6)      | 7.7 (±2.4)      | 7.5 (±3.1)      | 7.6 (±3.2)      | 6.9 (±2.7)      | 6.8 (±3.5)      | 6.9 (±3.5)      | 6.2 (±2.9)     | 7.3 (±3.1)            | 7.4 (±3.5)      | 7.1 (±2.4)      |
|                             | 2013 | 5.3 (±2.3)     | 5.4 (±2.3)     | 5.3 (±2.3)     | 6.3 (±2.1)      | 6.2 (±2.2)      | 6.3 (±2.0)      | 6.5 (±2.4)      | 6.6 (±2.7)       | 6.4 (±2.0)      | 6.7 (±2.8)      | 6.8 (±3.2)      | 6.4 (±1.9)      | 6.9 (±2.4)      | 6.9 (±2.4)      | 7.0 (±2.3)      | 7.3 (±4.0)      | 7.5 (±4.2)      | 6.5 (±2.4)     | 6.5 (±2.6)            | 6.6 (±2.9)      | 6.3 (±2.1)      |
|                             | 2019 | 5.6 (±2.5)     | 5.5 (±2.6)     | 5.6 (±2.4)     | 6.0 (±2.5)      | 5.9 (±2.8)      | 6.0 (±2.4)      | 6.1 (±2.1)      | 6.1 (±2.3)       | 6.1 (±1.9)      | 6.1 (±2.1)      | 6.2 (±2.3)      | 6.0 (±1.8)      | 6.4 (±2.2)      | 6.5 (±2.3)      | 6.2 (±2.0)      | 6.7 (±3.0)      | 6.5 (±2.9)      | 7.2 (±3.1)     | 6.0 (±2.3)            | 6.1 (±2.5)      | 6.0 (±2.2)      |
| Pt age (mean (SD))          | 2008 | 27.9 (±13.8)   | 29.4 (±14.0)   | 27.1 (±13.6)   | 31.7 (±11.7)    | 32.8 (±12.6)    | 30.5 (±10.7)    | 34.3 (±11.9)    | 35.4 (±12.5)     | 32.7 (±10.8)    | 36.7 (±13.1)    | 37.6 (±13.2)    | 33.7 (±12.2)    | 35.1 (±16.2)    | 36.0 (±16.1)    | 30.5 (±15.9)    | 28.2 (±18.5)    | 28.5 (±18.5)    | 25.5 (±17.8)   | 33.5 (±13.2)          | 34.9 (±13.8)    | 31.3 (±11.8)    |
|                             | 2013 | 28.2 (±13.7)   | 30.0 (±13.7)   | 27.4 (±13.6)   | 34.0 (±10.8)    | 35.0 (±11.6)    | 33.4 (±10.1)    | 36.4 (±10.7)    | 37.8 (±11.2)     | 34.8 (±9.9)     | 39.4 (±10.7)    | 40.5 (±11.1)    | 37.3 (±9.8)     | 40.9 (±12.6)    | 42.0 (±12.4)    | 36.3 (±12.7)    | 39.1 (±17.0)    | 39.7 (±17.1)    | 35.0 (±16.0)   | 36.5 (±12.1)          | 38.5 (±12.5)    | 34.0 (±11.2)    |
|                             | 2019 | 31.8 (±14.5)   | 33.5 (±14.2)   | 30.7 (±14.5)   | 36.4 (±10.9)    | 37.1 (±11.8)    | 36.0 (±10.3)    | 38.4 (±9.8)     | 39.4 (±10.6)     | 37.5 (±9.0)     | 40.6 (±10.5)    | 42.0 (±10.8)    | 38.7 (±9.8)     | 43.0 (±11.5)    | 43.9 (±11.6)    | 40.8 (±10.9)    | 43.3 (±14.3)    | 43.6 (±14.5)    | 41.2 (±13.1)   | 38.1 (±12.0)          | 40.0 (±12.3)    | 36.2 (±11.3)    |
| Prop. Fem. Pts (mean (SD))  | 2008 | 55.7 (±15.1)   | 46.9 (±10.7)   | 60.7 (±14.9)   | 55.2 (±13.2)    | 46.2 (±7.5)     | 63.8 (±11.6)    | 54.3 (±13.0)    | 46.3 (±7.4)      | 65.3 (±10.9)    | 51.0 (±11.0)    | 46.8 (±7.0)     | 65.0 (±10.7)    | 49.5 (±11.1)    | 47.3 (±8.5)     | 61.5 (±15.7)    | 47.8 (±13.2)    | 46.7 (±11.1)    | 57.6 (±22.6)   | 53.2 (±12.9)          | 46.6 (±7.8)     | 64.0 (±12.1)    |
|                             | 2013 | 55.3 (±15.6)   | 47.8 (±13.7)   | 59.0 (±15.1)   | 55.1 (±12.1)    | 46.1 (±8.3)     | 61.2 (±10.4)    | 53.7 (±12.3)    | 45.6 (±7.4)      | 62.9 (±9.9)     | 52.4 (±12.1)    | 45.9 (±7.5)     | 64.7 (±9.3)     | 48.9 (±10.1)    | 45.9 (±7.2)     | 62.2 (±10.5)    | 49.6 (±12.2)    | 47.2 (±10.4)    | 64.8 (±11.9)   | 53.1 (±12.5)          | 46.1 (±8.3)     | 62.3 (±11.0)    |
|                             | 2019 | 54.3 (±13.7)   | 47.7 (±11.2)   | 58.2 (±13.6)   | 54.3 (±11.8)    | 45.0 (±8.2)     | 59.9 (±10.0)    | 53.5 (±11.2)    | 45.4 (±7.6)      | 60.6 (±8.9)     | 52.4 (±11.8)    | 44.8 (±7.8)     | 62.2 (±8.5)     | 49.9 (±11.7)    | 45.1 (±7.9)     | 63.0 (±10.2)    | 48.2 (±9.9)     | 45.9 (±8.1)     | 60.7 (±9.6)    | 52.9 (±12.0)          | 45.5 (±8.4)     | 60.4 (±10.3)    |

1  
2  
3  
4  
5  
6  
7  
8  
9  
10  
11  
12  
13  
14  
15  
16  
17  
18  
19  
20  
21  
22  
23  
24  
25  
26  
27  
28  
29  
30  
31  
32  
33  
34  
35  
36  
37  
38  
39  
40  
41  
42  
43  
44  
45  
46  
47

|              |      |            |            |            |             |            |            |             |             |            |             |             |            |            |            |            |            |            |           |             |             |             |
|--------------|------|------------|------------|------------|-------------|------------|------------|-------------|-------------|------------|-------------|-------------|------------|------------|------------|------------|------------|------------|-----------|-------------|-------------|-------------|
| FTE (N (%)*) | 2008 | 290 (49.0) | 146 (50.3) | 144 (49.7) | 1210 (64.5) | 754 (62.3) | 456 (37.7) | 1802 (73.0) | 1173 (65.1) | 629 (34.9) | 1481 (75.1) | 1209 (81.6) | 272 (18.4) | 239 (58.4) | 220 (92.1) | 19 (8.0)   | 114 (32.0) | 107 (93.9) | 7 (6.1)   | 5136 (66.9) | 3609 (70.3) | 1527 (29.7) |
|              | 2013 | 335 (45.4) | 152 (45.4) | 183 (54.6) | 1073 (64.4) | 556 (51.8) | 517 (48.2) | 1694 (73.3) | 1014 (59.9) | 680 (40.1) | 1634 (75.3) | 1156 (70.8) | 478 (29.3) | 474 (67.0) | 415 (87.6) | 59 (12.5)  | 189 (41.6) | 177 (93.7) | 12 (6.4)  | 5399 (67.1) | 3470 (64.3) | 1929 (35.7) |
|              | 2019 | 734 (51.9) | 351 (47.8) | 383 (52.2) | 1401 (65.6) | 628 (44.8) | 773 (55.2) | 1722 (76.8) | 881 (51.2)  | 841 (48.8) | 1681 (73.8) | 1052 (62.6) | 629 (37.4) | 514 (72.6) | 402 (78.2) | 112 (21.8) | 327 (54.6) | 288 (88.1) | 39 (11.9) | 6379 (68.0) | 3602 (56.5) | 2777 (43.5) |

Comp. FPs: Comprehensive family physicians; Pract.: Practice; PC: Primary care; Pt(s): Patient(s); Prop: Proportion; Fem: Female; FTE: Comp FPs practicing full-time equivalent

\*For the covariate "FTE", the "%" in the "Total" columns represents the proportion of all comprehensive FPs in that age group who are FTE. The "%" in the "M" and "F" columns represents the proportion of FTE physicians in that age group who are male or female.

For peer review only

Supplemental eTable 3. Comprehensive family physician practice model over time by physician age and sex

| Year | Model | Total |      | Age < 35   |        |            |          | Age 35 - 44 |         |            |        | Age 45 - 54 |          |         |         | Age 55 - 64 |        |            |          | Age 65 - 69 |         |     |        | Age 70+  |          |         |         | Total Sample |        |          |          |         |         |            |        |          |          |      |      |      |      |      |      |
|------|-------|-------|------|------------|--------|------------|----------|-------------|---------|------------|--------|-------------|----------|---------|---------|-------------|--------|------------|----------|-------------|---------|-----|--------|----------|----------|---------|---------|--------------|--------|----------|----------|---------|---------|------------|--------|----------|----------|------|------|------|------|------|------|
|      |       | N     | %    | N          | Male % | N          | Female % | Total N     | Total % | N          | Male % | N           | Female % | Total N | Total % | N           | Male % | N          | Female % | Total N     | Total % | N   | Male % | N        | Female % | Total N | Total % | N            | Male % | N        | Female % | Total N | Total % | N          | Male % | N        | Female % |      |      |      |      |      |      |
| 2008 | EFFS  | 243   | 41   | 91         | 43.1   | 152        | 39.9     | 1009        | 53.8    | 513        | 55.6   | 496         | 51.9     | 1410    | 57.2    | 796         | 56     | 614        | 58.8     | 1194        | 60      | 903 | 59.3   | 281      | 62.4     | 210     | 51.3    | 174          | 50.1   | 36       | 58.1     | 142     | 39.9    | 129        | 40.4   | 13       | 35.1     | 4198 | 54.7 | 2606 | 54.9 | 1592 | 54.3 |
|      | CAP   | 56    | 9.5  | *11 - 15   |        | *43 - 47   |          | 167         | 8.9     | 70         | 7.6    | 97          | 10.2     | 191     | 7.7     | 114         | 8      | 77         | 7.4      | *128-132    |         | 104 | 6.8    | *24 - 28 |          | *30-34  |         | *27 - 31     |        | *1 - 5   |          | 7       | 2       | 7          | 2.2    | 0        | 0        | 583  | 7.6  | 337  | 7.1  | 246  | 8.4  |
|      | FHT   | 85    | 14.4 | 35         | 16.6   | 50         | 13.1     | 281         | 15      | 126        | 13.7   | 155         | 16.2     | 402     | 16.3    | 228         | 16     | 174        | 16.7     | *276-280    |         | 228 | 15     | *48 - 52 |          | 48      | 11.7    | *43-47       |        | *1 - 5   |          | 17      | 4.8     | *12-16     |        | *1 - 5   |          | 1113 | 14.5 | 680  | 14.3 | 433  | 14.8 |
|      | NOG   | 198   | 33.4 | 69         | 32.7   | 129        | 33.9     | 389         | 20.7    | 202        | 21.9   | 187         | 19.6     | 427     | 17.3    | 256         | 18     | 171        | 16.4     | 356         | 18.1    | 268 | 17.6   | 88       | 19.6     | 118     | 28.9    | *94-98       |        | *20 - 24 |          | 190     | 53.4    | *163-167   |        | *23 - 27 |          | 1678 | 21.9 | 1056 | 22.3 | 622  | 21.2 |
|      | OGP   | 10    | 1.7  | *1-5       |        | *3 - 7     |          | 31          | 1.7     | 11         | 1.2    | 20          | 2.1      | 37      | 1.5     | 28          | 2      | 9          | 0.9      | *20-24      |         | 19  | 1.2    | *1-5     |          | *1-5    |         | *1-5         |        | 0        | 0        | 0       | 0       | 0          | 0      | 0        | 0        | 101  | 1.3  | 64   | 1.3  | 37   | 1.3  |
| 2013 | EFFS  | 162   | 21.9 | 65         | 26.5   | 97         | 19.6     | 571         | 34.3    | 243        | 36.1   | 328         | 33.1     | 853     | 36.9    | 464         | 37.8   | 389        | 35.9     | 766         | 35.3    | 481 | 34     | 285      | 37.7     | 292     | 41.3    | 218          | 37.8   | 74       | 56.5     | 173     | 38.1    | 149        | 38     | 24       | 38.7     | 2817 | 35   | 1620 | 35.8 | 1197 | 34   |
|      | CAP   | 108   | 14.6 | *28 - 32   |        | *76-80     |          | 361         | 21.7    | *127 - 131 |        | *229 - 233  |          | 582     | 25.2    | 310         | 25.3   | 272        | 25.1     | 603         | 27.8    | 407 | 28.8   | 196      | 26       | 168     | 23.8    | 146          | 25.3   | 22       | 16.8     | 75      | 16.5    | *65-69     |        | *6 - 10  |          | 1897 | 23.6 | 1091 | 24.1 | 806  | 22.9 |
|      | FHT   | 186   | 25.1 | 64         | 26.1   | 122        | 24.6     | 461         | 27.7    | 183        | 27.2   | *276 - 280  |          | 547     | 23.7    | *266-270    |        | *277 - 281 |          | 501         | 23.1    | 325 | 23     | 176      | 23.3     | 127     | 18      | 114          | 19.8   | 13       | 9.9      | 55      | 12.1    | *50-54     |        | *1 - 5   |          | 1877 | 23.3 | 1007 | 22.2 | 870  | 24.7 |
|      | NOG   | 277   | 37.4 | 83         | 33.9   | 194        | 39.1     | 266         | 16      | 116        | 17.2   | 150         | 15.1     | 313     | 13.5    | 172         | 14     | 141        | 13       | 273         | 12.6    | 183 | 12.9   | 90       | 11.9     | 110     | 15.6    | 88           | 15.3   | 22       | 16.8     | 151     | 33.3    | 124        | 31.6   | 27       | 43.5     | 1390 | 17.3 | 766  | 16.9 | 624  | 17.7 |
|      | OGP   | 8     | 1.1  | *1-5       |        | *3-7       |          | 7           | 0.4     | *1-5       |        | *2 - 6      |          | 17      | 0.7     | *11-15      |        | *2 - 6     |          | 27          | 1.2     | 19  | 1.3    | 8        | 1.1      | 10      | 1.4     | 10           | 1.7    | 0        | 0        | 0       | 0       | 0          | 0      | 69       | 0.9      | 45   | 1    | 24   | 0.7  |      |      |
| 2019 | EFFS  | 249   | 17.6 | *103 - 107 |        | *144 - 148 |          | 518         | 24.3    | 218        | 27     | 300         | 22.6     | 712     | 31.8    | *348 - 352  |        | *360-364   |          | 707         | 31      | 408 | 31.6   | 299      | 30.2     | 244     | 34.5    | *163 - 167   |        | *75 - 79 |          | 239     | 39.9    | *190 - 194 |        | 48       | 51.1     | 2669 | 28.5 | 1437 | 30.6 | 1232 | 26.3 |
|      | CAP   | 341   | 24.1 | 124        | 23.5   | 217        | 24.5     | 597         | 28      | 193        | 23.9   | 404         | 30.4     | 699     | 31.2    | 315         | 30.1   | 384        | 32.2     | 725         | 31.8    | 399 | 30.9   | 326      | 33       | 221     | 31.2    | 176          | 33.9   | 45       | 23.8     | 165     | 27.5    | 145        | 28.9   | 19       | 20.2     | 2748 | 29.3 | 1353 | 28.8 | 1395 | 29.8 |
|      | FHT   | 376   | 26.6 | 137        | 25.9   | 239        | 27       | 683         | 32      | 252        | 31.3   | 431         | 32.4     | 583     | 26      | 255         | 24.3   | 328        | 27.5     | 577         | 25.3    | 321 | 24.9   | 256      | 25.9     | 151     | 21.3    | 109          | 21     | 42       | 22.2     | 79      | 13.2    | 71         | 14.1   | 8        | 8.5      | 2449 | 26.1 | 1145 | 24.4 | 1304 | 27.9 |
|      | NOG   | 437   | 30.9 | 157        | 29.7   | 280        | 31.6     | 316         | 14.8    | 133        | 16.5   | 183         | 13.8     | 237     | 10.6    | 123         | 11.7   | 114        | 9.5      | 241         | 10.6    | 141 | 10.9   | 100      | 10.1     | 82      | 11.6    | 64           | 12.3   | 22       | 11.6     | 112     | 18.7    | 93         | 18.4   | 19       | 20.2     | 1429 | 15.2 | 711  | 15.1 | 718  | 15.3 |
|      | OGP   | 11    | 0.8  | *3 - 7     |        | *2 - 6     |          | 21          | 1       | 10         | 1.2    | 11          | 0.8      | 11      | 0.5     | *3 - 7      |        | *4-8       |          | 29          | 1.3     | 21  | 1.6    | 8        | 0.8      | *6-10   |         | *3 - 7       |        | *1-5     |          | *1-5    |         | *1-5       |        | 0        | 0        | 82   | 0.9  | 50   | 1.1  | 32   | 0.7  |

Percentages are column percentages

Ranges preceded by an asterisk (\*) represent suppressed cells due to small cell sizes

EFFS: Enhanced fee-for-service. This is a fee-for-service payment model that requires patient enrollment and includes some pay enhancements, such as higher fee-for-service payments for enrolled patients and bonus payments for preventive care targets.

CAP: Capitation. An alternate payment plan (APP) model where the majority of physician payments come from an annual amount for each enrolled patient adjusted for patient age and sex.

FHT: Capitation models with additional funding for interdisciplinary team members such as nurse practitioners and social workers.

NOG: No group. These physicians are paid via traditional fee-for-service, without any enrollment requirements or pay enhancements.

OGP: Other physician group types, typically serving a specific targeted population or geography (for example, rural/remote) with varying funding mechanisms.

## Supplemental eTable 4. Geographic Distribution of Comprehensive FPs

### A. Comprehensive FPs by Geography

|                            | Large Urban  | Urban        | Small Urban/Suburban | Rural/Remote | Total         |
|----------------------------|--------------|--------------|----------------------|--------------|---------------|
| <b>2008</b>                |              |              |                      |              |               |
| N (% of Comprehensive FPs) | 3,909 (51.1) | 1,990 (26.0) | 1,236 (16.2)         | 513 (6.7)    | 7,648 (100.0) |
| <b>2013</b>                |              |              |                      |              |               |
| N (% of Comprehensive FPs) | 4,105 (51.1) | 2,314 (28.8) | 1,207 (15.0)         | 410 (5.1)    | 8,036 (100.0) |
| <b>2019</b>                |              |              |                      |              |               |
| N (% of Comprehensive FPs) | 4,674 (50.0) | 2,685 (28.7) | 14,98 (16.0)         | 492 (5.3)    | 9,349 (100.0) |

Note: Geographic data missing for: 2008 (25), 2013 (14), 2019 (28)

### B. Rural (RIO 40+) Comprehensive FPs by Age Group

|                                  | <35 years | 35-44 years | 45-54 years | 55-64 years | 65-69 years | 70+ years | Total       |
|----------------------------------|-----------|-------------|-------------|-------------|-------------|-----------|-------------|
| <b>2008</b>                      |           |             |             |             |             |           |             |
| N (% of rural comprehensive FPs) | 46 (9.0)  | 135 (26.3)  | 166 (32.4)  | 118 (23.0)  | 27 (5.3)    | 21 (4.1)  | 513 (100.0) |
| <b>2013</b>                      |           |             |             |             |             |           |             |
| N (% of rural comprehensive FPs) | 31 (7.6)  | 76 (18.5)   | 109 (26.6)  | 129 (31.5)  | 44 (10.7)   | 21 (5.1)  | 410 (100.0) |
| <b>2019</b>                      |           |             |             |             |             |           |             |
| N (% of rural comprehensive FPs) | 89 (18.1) | 111 (22.6)  | 121 (24.6)  | 117 (23.8)  | 32 (6.5)    | 22 (4.5)  | 492 (100.0) |



1  
2 C. Rural (RIO 40+) Comprehensive FPs by Physicians Sex  
3

4

|    | Male Physicians |                              |                            | Female Physicians |                              |                            | Total Rural |                            | All Comprehensive FPs |                            |     |
|----|-----------------|------------------------------|----------------------------|-------------------|------------------------------|----------------------------|-------------|----------------------------|-----------------------|----------------------------|-----|
|    | N               | % of Rural Comprehensive FPs | % of all Comprehensive FPs | N                 | % of Rural Comprehensive FPs | % of all Comprehensive FPs | N           | % of all Comprehensive FPs | N                     | % of all Comprehensive FPs |     |
| 5  |                 |                              |                            |                   |                              |                            |             |                            |                       |                            |     |
| 6  |                 |                              |                            |                   |                              |                            |             |                            |                       |                            |     |
| 7  |                 |                              |                            |                   |                              |                            |             |                            |                       |                            |     |
| 8  | <b>2008</b>     | 362                          | 70.6                       | 4.7               | 151                          | 29.4                       | 2           | 513                        | 6.7                   | 7648                       | 6.7 |
| 9  | <b>2013</b>     | 268                          | 65.4                       | 3.3               | 142                          | 34.6                       | 1.8         | 410                        | 5.1                   | 8036                       | 5.1 |
| 10 | <b>2019</b>     | 279                          | 56.7                       | 3                 | 213                          | 43.3                       | 2.3         | 492                        | 5.3                   | 9349                       | 5.3 |
| 11 |                 |                              |                            |                   |                              |                            |             |                            |                       |                            |     |
| 12 |                 |                              |                            |                   |                              |                            |             |                            |                       |                            |     |

13 We were unable to stratify by both age and sex due to suppressed cells (cell sizes <6) in older age categories for male and female physicians in the rural category.

14 Large urban: Rurality Index of Ontario (RIO) score of 0

15 Urban: RIO score of 1-9

16 Suburban/Small Urban: RIO score of 10-39

17 Rural/remote: RIO score of 40+

18  
19  
20  
21  
22  
23  
24  
25  
26  
27  
28  
29  
30  
31  
32  
33  
34  
35  
36  
37  
38  
39  
40  
41  
42  
43  
44  
45  
46  
47

Supplemental eTable 5. Practice characteristics: Medical and social complexity of patients attached to comprehensive family physicians over time by physician age and sex

|                                                           |      | <35 Years |      |      | 35-44 Years |      |      | 45-54 Years |      |      | 55-64 Years |      |      | 65-69 Years |      |      | 70+ Years |      |      | TOTAL |      |      |
|-----------------------------------------------------------|------|-----------|------|------|-------------|------|------|-------------|------|------|-------------|------|------|-------------|------|------|-----------|------|------|-------|------|------|
|                                                           |      | Total     | M    | F    | Total       | M    | F    | Total       | M    | F    | Total       | M    | F    | Total       | M    | F    | Total     | M    | F    | Total | M    | F    |
|                                                           |      | %         | %    | %    | %           | %    | %    | %           | %    | %    | %           | %    | %    | %           | %    | %    | %         | %    | %    | %     | %    | %    |
| <b>Highest morbidity (RUB 4+)</b>                         | 2008 | 15.3      | 14.7 | 15.6 | 16.2        | 15.8 | 16.7 | 16.4        | 16.5 | 16.2 | 17.3        | 17.5 | 16.6 | 16.8        | 17.2 | 14.0 | 14.0      | 14.1 | 13.0 | 16.5  | 16.7 | 16.3 |
|                                                           | 2013 | 17.5      | 17.6 | 17.4 | 18.2        | 17.5 | 18.7 | 17.7        | 17.8 | 17.6 | 18.1        | 18.5 | 17.3 | 19.5        | 20.0 | 17.5 | 20.1      | 20.5 | 17.9 | 18.1  | 18.3 | 17.8 |
|                                                           | 2019 | 19.3      | 19.4 | 19.2 | 20.6        | 20.2 | 20.8 | 19.4        | 19.4 | 19.4 | 19.5        | 20.2 | 18.7 | 20.3        | 20.4 | 20.1 | 21.4      | 21.5 | 21.3 | 19.8  | 19.9 | 19.7 |
| <b>Lowest income quintile</b>                             | 2008 | 18.5      | 19.2 | 18.1 | 18.1        | 19.6 | 16.6 | 18.4        | 19.8 | 16.4 | 19.9        | 20.2 | 18.8 | 22.6        | 22.5 | 23.6 | 23.9      | 20.1 | 17.2 | 19.0  | 20.1 | 17.2 |
|                                                           | 2013 | 18.9      | 20.6 | 18.0 | 17.2        | 19.1 | 16.0 | 18.0        | 19.4 | 16.4 | 18.4        | 19.5 | 16.5 | 20.5        | 20.4 | 21.2 | 24.0      | 24.2 | 22.5 | 18.3  | 19.6 | 16.7 |
|                                                           | 2019 | 20.4      | 21.9 | 20.7 | 18.8        | 20.7 | 17.6 | 18.3        | 20.5 | 16.5 | 18.8        | 20.4 | 16.8 | 19.9        | 20.7 | 17.9 | 22.1      | 22.2 | 21.4 | 19.0  | 20.7 | 17.5 |
| <b>Highest housing instability quintile</b>               | 2008 | 24.5      | 22.8 | 25.5 | 20.6        | 20.7 | 20.4 | 20.4        | 20.4 | 20.4 | 21.9        | 21.6 | 23.0 | 24.0        | 23.1 | 29.2 | 25.5      | 25.6 | 24.2 | 21.4  | 21.2 | 21.7 |
|                                                           | 2013 | 26.0      | 23.6 | 27.2 | 21.8        | 20.9 | 22.5 | 19.9        | 20.4 | 19.4 | 20.8        | 20.6 | 21.3 | 21.7        | 21.8 | 21.2 | 24.5      | 24.1 | 26.6 | 21.4  | 20.9 | 21.9 |
|                                                           | 2019 | 26.5      | 25.3 | 27.2 | 24.5        | 24.7 | 24.5 | 21.1        | 21.8 | 20.4 | 21.4        | 21.5 | 21.3 | 22.6        | 21.7 | 24.9 | 25.5      | 25.2 | 27.1 | 23.0  | 22.7 | 23.3 |
| <b>Highest material deprivation quintile</b>              | 2008 | 18.6      | 19.8 | 17.9 | 17.4        | 19.3 | 15.5 | 18.2        | 20.1 | 15.6 | 20.5        | 21.3 | 18.1 | 23.7        | 23.9 | 22.4 | 25.7      | 26.2 | 21.3 | 19.0  | 20.6 | 16.4 |
|                                                           | 2013 | 22.9      | 24.6 | 22.0 | 20.5        | 22.1 | 19.4 | 21.2        | 22.9 | 19.3 | 21.4        | 22.6 | 19.2 | 23.7        | 23.2 | 25.7 | 29.2      | 29.4 | 27.8 | 21.5  | 22.8 | 19.9 |
|                                                           | 2019 | 18.2      | 19.7 | 17.3 | 17.3        | 19.9 | 15.8 | 17.0        | 19.3 | 15.0 | 18.1        | 19.8 | 15.9 | 19.7        | 20.9 | 16.7 | 21.8      | 22.1 | 19.9 | 17.8  | 19.8 | 15.9 |
| <b>Highest neighborhood ethnic concentration quintile</b> | 2008 | 27.4      | 30.8 | 25.5 | 27.5        | 28.4 | 26.5 | 26.0        | 26.1 | 25.9 | 27.2        | 26.3 | 30.4 | 28.0        | 26.4 | 37.2 | 32.6      | 32.8 | 30.7 | 26.9  | 26.9 | 27.0 |
|                                                           | 2013 | 29.9      | 31.1 | 29.2 | 28.6        | 29.2 | 28.2 | 27.9        | 29.2 | 26.6 | 27.2        | 27.2 | 27.3 | 27.7        | 25.5 | 37.3 | 33.0      | 32.0 | 39.4 | 28.0  | 28.1 | 28.0 |
|                                                           | 2019 | 26.0      | 26.6 | 25.7 | 25.8        | 27.2 | 25.0 | 28.5        | 29.2 | 27.8 | 27.0        | 26.8 | 27.3 | 33.2        | 33.7 | 31.9 | 32.1      | 30.9 | 38.5 | 27.4  | 28.3 | 26.7 |

Interpretation: For example, in 2008, within the group of comprehensive family physicians under the age of 35 years, 15.3% of patients in those practices had the highest level of morbidity (RUB 4+). When further stratified by physician sex, 14.7% of patients attached to male comprehensive family physicians belonged to the highest morbidity (RUB 4+) group.

RUB: Morbidity, based on Resource Utilization Band

STROBE Statement—Checklist of items that should be included in reports of *cross-sectional studies*

|                              | Item No                                                                            | Recommendation                                                                                                                                                                                    | Page No                    |
|------------------------------|------------------------------------------------------------------------------------|---------------------------------------------------------------------------------------------------------------------------------------------------------------------------------------------------|----------------------------|
| <b>Title and abstract</b>    | 1                                                                                  | (a) Indicate the study's design with a commonly used term in the title or the abstract                                                                                                            | 1, 2-3                     |
|                              |                                                                                    | (b) Provide in the abstract an informative and balanced summary of what was done and what was found                                                                                               | 2-3                        |
| <b>Introduction</b>          |                                                                                    |                                                                                                                                                                                                   |                            |
| Background/rationale         | 2                                                                                  | Explain the scientific background and rationale for the investigation being reported                                                                                                              | 5-6                        |
| Objectives                   | 3                                                                                  | State specific objectives, including any prespecified hypotheses                                                                                                                                  | 6                          |
| <b>Methods</b>               |                                                                                    |                                                                                                                                                                                                   |                            |
| Study design                 | 4                                                                                  | Present key elements of study design early in the paper                                                                                                                                           | 6-8                        |
| Setting                      | 5                                                                                  | Describe the setting, locations, and relevant dates, including periods of recruitment, exposure, follow-up, and data collection                                                                   | 7-8                        |
| Participants                 | 6                                                                                  | (a) Give the eligibility criteria, and the sources and methods of selection of participants                                                                                                       | 7-9                        |
| Variables                    | 7                                                                                  | Clearly define all outcomes, exposures, predictors, potential confounders, and effect modifiers. Give diagnostic criteria, if applicable                                                          | 7-9, Supplemental eMethods |
| Data sources/<br>measurement | 8*                                                                                 | For each variable of interest, give sources of data and details of methods of assessment (measurement). Describe comparability of assessment methods if there is more than one group              | 7-9, Supplemental eMethods |
| Bias                         | 9                                                                                  | Describe any efforts to address potential sources of bias                                                                                                                                         | Figure 1a, 1b              |
| Study size                   | 10                                                                                 | Explain how the study size was arrived at                                                                                                                                                         | 8-9, Figure 1a, 1b         |
| Quantitative variables       | 11                                                                                 | Explain how quantitative variables were handled in the analyses. If applicable, describe which groupings were chosen and why                                                                      | 8-9                        |
| Statistical methods          | 12                                                                                 | (a) Describe all statistical methods, including those used to control for confounding                                                                                                             | 8-9                        |
|                              |                                                                                    | (b) Describe any methods used to examine subgroups and interactions                                                                                                                               | 8-9                        |
|                              | (c) Explain how missing data were addressed                                        | 7, Supplemental eTable 4                                                                                                                                                                          |                            |
|                              | (d) If applicable, describe analytical methods taking account of sampling strategy | n/a                                                                                                                                                                                               |                            |
|                              | (e) Describe any sensitivity analyses                                              | n/a                                                                                                                                                                                               |                            |
| <b>Results</b>               |                                                                                    |                                                                                                                                                                                                   |                            |
| Participants                 | 13*                                                                                | (a) Report numbers of individuals at each stage of study—eg numbers potentially eligible, examined for eligibility, confirmed eligible, included in the study, completing follow-up, and analysed | 9, Figure 1a, 1b           |
|                              |                                                                                    | (b) Give reasons for non-participation at each stage                                                                                                                                              | 9, Figure 1a, 1b           |
|                              |                                                                                    | (c) Consider use of a flow diagram                                                                                                                                                                | Figure 1a, 1b              |

|                          |     |                                                                                                                                                                                                              |                                      |
|--------------------------|-----|--------------------------------------------------------------------------------------------------------------------------------------------------------------------------------------------------------------|--------------------------------------|
| Descriptive data         | 14* | (a) Give characteristics of study participants (eg demographic, clinical, social) and information on exposures and potential confounders                                                                     | 8-16                                 |
|                          |     | (b) Indicate number of participants with missing data for each variable of interest                                                                                                                          | Figure 1a, 1b, Supplemental eTable 4 |
| Outcome data             | 15* | Report numbers of outcome events or summary measures                                                                                                                                                         | 9-16                                 |
| Main results             | 16  | (a) Give unadjusted estimates and, if applicable, confounder-adjusted estimates and their precision (eg, 95% confidence interval). Make clear which confounders were adjusted for and why they were included | 9-16                                 |
|                          |     | (b) Report category boundaries when continuous variables were categorized                                                                                                                                    | n/a                                  |
|                          |     | (c) If relevant, consider translating estimates of relative risk into absolute risk for a meaningful time period                                                                                             | n/a                                  |
| Other analyses           | 17  | Report other analyses done—eg analyses of subgroups and interactions, and sensitivity analyses                                                                                                               | n/a                                  |
| <b>Discussion</b>        |     |                                                                                                                                                                                                              |                                      |
| Key results              | 18  | Summarise key results with reference to study objectives                                                                                                                                                     | 17-18                                |
| Limitations              | 19  | Discuss limitations of the study, taking into account sources of potential bias or imprecision. Discuss both direction and magnitude of any potential bias                                                   | 19-20                                |
| Interpretation           | 20  | Give a cautious overall interpretation of results considering objectives, limitations, multiplicity of analyses, results from similar studies, and other relevant evidence                                   | 17-20                                |
| Generalisability         | 21  | Discuss the generalisability (external validity) of the study results                                                                                                                                        | 19-20                                |
| <b>Other information</b> |     |                                                                                                                                                                                                              |                                      |
| Funding                  | 22  | Give the source of funding and the role of the funders for the present study and, if applicable, for the original study on which the present article is based                                                | 21-22                                |

\*Give information separately for exposed and unexposed groups.

**Note:** An Explanation and Elaboration article discusses each checklist item and gives methodological background and published examples of transparent reporting. The STROBE checklist is best used in conjunction with this article (freely available on the Web sites of PLoS Medicine at <http://www.plosmedicine.org/>, Annals of Internal Medicine at <http://www.annals.org/>, and Epidemiology at <http://www.epidem.com/>). Information on the STROBE Initiative is available at [www.strobe-statement.org](http://www.strobe-statement.org).
