# Supplementary material for: Characteristics of patients attached to near-retirement family physicians: a population-based serial cross-sectional study in Ontario, Canada
Source: PubMed Central journal article supplement — BMJ Open. 2023 Dec 7;13(12):e074120. doi: 10.1136/bmjopen-2023-074120 (PMC10711930; doi:10.1136/bmjopen-2023-074120), 2023-12-07
Supplement: bmjopen-2023-074120supp002.pdf [file bmjopen-2023-074120supp002.pdf]

**Supplemental eFigure 1. Proportion of all family physicians practicing comprehensiveness by year, age, and sex**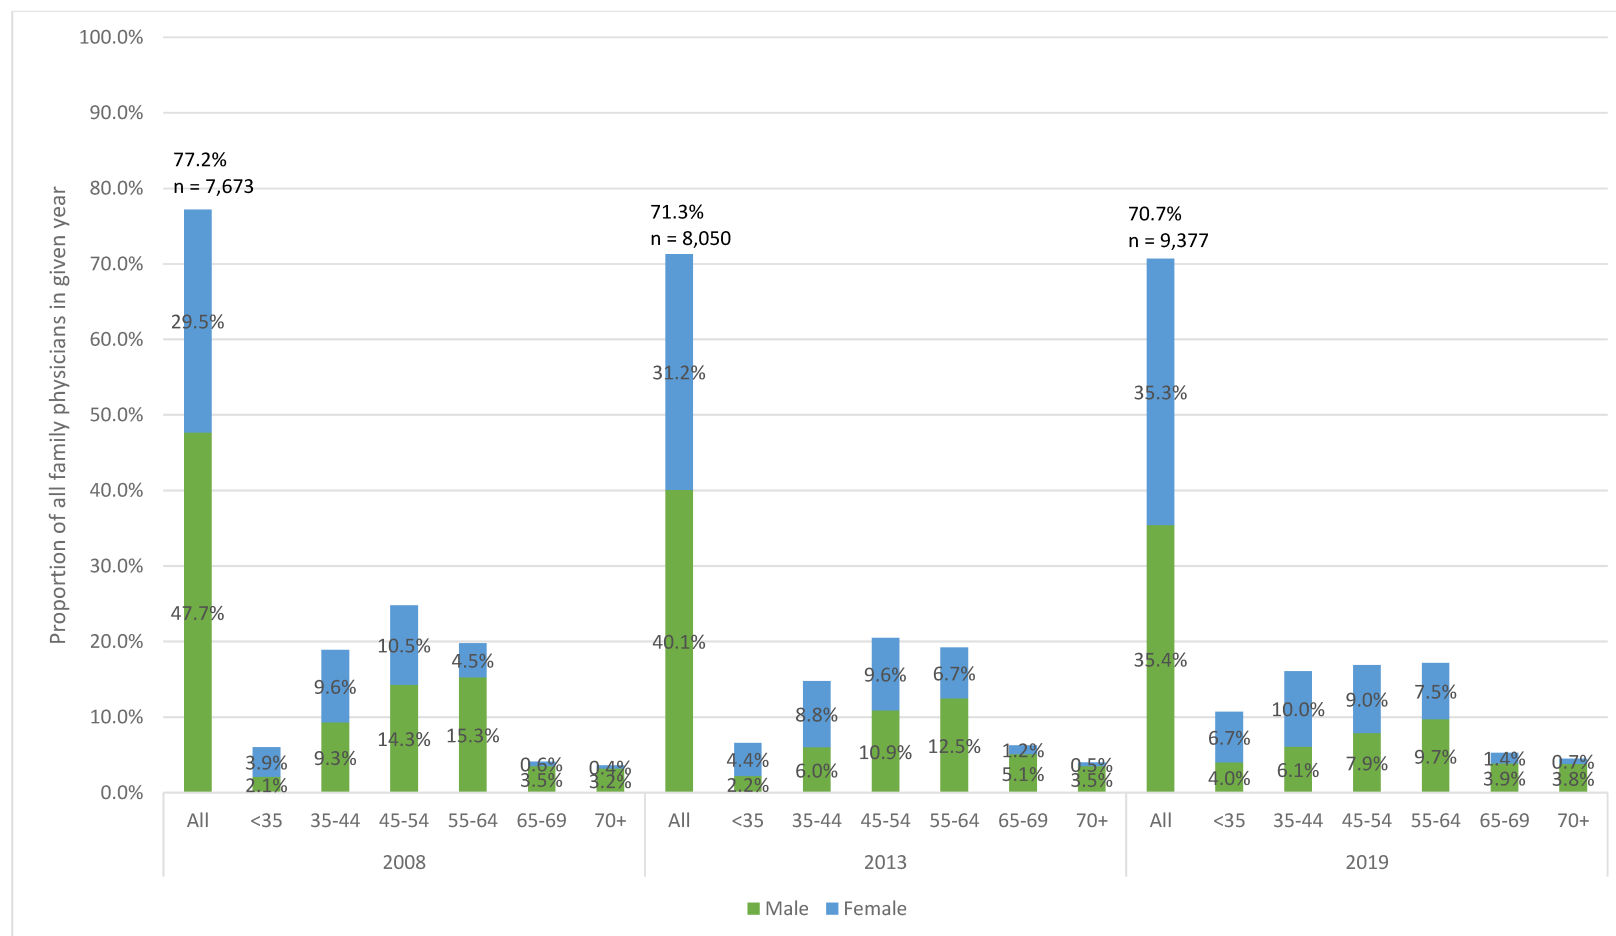

Total Ns (all family physicians): 2008: 9,944; 2013: 11,288; 2019: 13,269

Missing age for the age stratifications by year: 2008 = 9; 2013 = 13; 2019 = 7

Example of interpretation for bars labeled "All": Of all family physicians in the 2008 cohort, 29.5% are females practicing comprehensiveness.

Example of interpretation for age-stratification bars: Of all family physicians in the 2008 cohort, the proportion who were female, under age 35 years, and practicing comprehensiveness is 3.9%.
