# Supplementary material for: Characteristics of patients attached to near-retirement family physicians: a population-based serial cross-sectional study in Ontario, Canada
Source: PubMed Central journal article supplement — BMJ Open. 2023 Dec 7;13(12):e074120. doi: 10.1136/bmjopen-2023-074120 (PMC10711930; doi:10.1136/bmjopen-2023-074120), 2023-12-07
Supplement: bmjopen-2023-074120supp004.pdf [file bmjopen-2023-074120supp004.pdf]

Supplemental eTable 1. Comprehensive family physicians by physician age

|                                   | <35 years |         |       |                           |                                   | 35-44 years |         |       |                             |                                     | 45-54 years |         |       |                             |                                     | 55-64 years |         |       |                             |                                     | 65-69 years |         |       |                             |                                     | 70+ years |         |       |                           |                                   | All  |         |                 |             |                               |                           |       |
|-----------------------------------|-----------|---------|-------|---------------------------|-----------------------------------|-------------|---------|-------|-----------------------------|-------------------------------------|-------------|---------|-------|-----------------------------|-------------------------------------|-------------|---------|-------|-----------------------------|-------------------------------------|-------------|---------|-------|-----------------------------|-------------------------------------|-----------|---------|-------|---------------------------|-----------------------------------|------|---------|-----------------|-------------|-------------------------------|---------------------------|-------|
|                                   | Comp      | Noncomp | Total | % of <35 FPs who are comp | % of all FPs who are comp and <35 | Comp        | Noncomp | Total | % of 35-44 FPs who are comp | % of all FPs who are comp and 35-44 | Comp        | Noncomp | Total | % of 45-54 FPs who are comp | % of all FPs who are comp and 45-54 | Comp        | Noncomp | Total | % of 55-64 FPs who are comp | % of all FPs who are comp and 55-64 | Comp        | Noncomp | Total | % of 65-69 FPs who are comp | % of all FPs who are comp and 65-69 | Comp      | Noncomp | Total | % of 70+ FPs who are comp | % of all FPs who are comp and 70+ | Comp | Noncomp | Total - all FPs | Missing age | Total - all including missing | % of all FPs who are comp |       |
| 2008                              | 592       | 305     | 897   | 66.0%                     | 6.0%                              | 1877        | 652     | 2529  | 74.2%                       | 18.9%                               | 2467        | 581     | 3048  | 80.9%                       | 24.8%                               | 1972        | 430     | 2402  | 82.1%                       | 19.8%                               | 409         | 133     | 542   | 75.5%                       | 4.1%                                | 356       | 161     | 517   | 68.9%                     | 3.6%                              | 7673 | 2262    | 9935            | 9           | 9944                          | 77.2%                     |       |
| 2013                              | 741       | 503     | 1244  | 59.6%                     | 6.6%                              | 1666        | 755     | 2421  | 68.8%                       | 14.8%                               | 2312        | 708     | 3020  | 76.6%                       | 20.5%                               | 2170        | 615     | 2785  | 77.9%                       | 19.2%                               | 707         | 278     | 985   | 71.8%                       | 6.3%                                | 454       | 366     | 820   | 55.4%                     | 4.0%                              | 8050 | 3225    | 11275           | 13          | 11288                         | 71.3%                     |       |
| 2019                              | 1414      | 697     | 2111  | 67.0%                     | 10.7%                             | 2135        | 827     | 2962  | 72.1%                       | 16.1%                               | 2242        | 716     | 2958  | 75.8%                       | 16.9%                               | 2279        | 757     | 3036  | 75.1%                       | 17.2%                               | 708         | 374     | 1082  | 65.4%                       | 5.3%                                | 599       | 514     | 1113  | 53.8%                     | 4.5%                              | 9377 | 3885    | 13262           | 7           | 13269                         | 70.7%                     |       |
| Relative Change (2019/2008)       |           |         |       | 101.5%                    | 179.0%                            |             |         |       | 97.1%                       | 85.2%                               |             |         |       | 93.6%                       | 68.1%                               |             |         |       |                             |                                     |             |         |       |                             | 86.7%                               | 129.7%    |         |       |                           |                                   |      |         |                 |             |                               |                           | 91.6% |
| Absolute Change (2019 minus 2008) |           |         |       | 1.0%                      | 4.7%                              |             |         |       | -2.1%                       | -2.8%                               |             |         |       | -5.1%                       | -7.9%                               |             |         |       |                             |                                     |             |         |       |                             | -10.0%                              | 1.2%      |         |       |                           |                                   |      |         |                 |             |                               |                           | -6.5% |

Comp: Comprehensive FPs  
 Noncomp: Non-comprehensive FPs
