# Supplementary material for: Characteristics of patients attached to near-retirement family physicians: a population-based serial cross-sectional study in Ontario, Canada
Source: PubMed Central journal article supplement — BMJ Open. 2023 Dec 7;13(12):e074120. doi: 10.1136/bmjopen-2023-074120 (PMC10711930; doi:10.1136/bmjopen-2023-074120), 2023-12-07
Supplement: bmjopen-2023-074120supp005.pdf [file bmjopen-2023-074120supp005.pdf]

Supplemental eTable 2a. Comprehensive family physicians by physician age and sex

|                 |      | <35 Years   |            |            | 35-44 Years |            |             | 45-54 Years |             |             | 55-64 Years |             |            | 65-69 Years |            |            | 70+ Years |            |           | Total Comprehensive FPs |             |             |
|-----------------|------|-------------|------------|------------|-------------|------------|-------------|-------------|-------------|-------------|-------------|-------------|------------|-------------|------------|------------|-----------|------------|-----------|-------------------------|-------------|-------------|
|                 |      | Total       | M          | F          | Total       | M          | F           | Total       | M           | F           | Total       | M           | F          | Total       | M          | F          | Total     | M          | F         | Total                   | M           | F           |
| Comp. FPs N (%) | 2008 | 592 (7.7)   | 211 (35.6) | 381 (64.4) | 1877 (24.5) | 922 (49.1) | 955 (50.9)  | 2467 (32.2) | 1422 (57.6) | 1045 (42.4) | 1972 (25.7) | 1522 (77.2) | 450 (22.8) | 409 (5.3)   | 347 (84.8) | 62 (15.2)  | 356 (4.6) | 319 (89.6) | 37 (10.4) | 7673 (100.0)            | 4743 (61.8) | 2930 (38.2) |
|                 | 2013 | 741 (9.2)   | 245 (33.1) | 496 (66.9) | 1666 (20.7) | 674 (40.5) | 992 (59.5)  | 2312 (28.7) | 1227 (53.1) | 1085 (46.9) | 2170 (27.0) | 1415 (65.2) | 755 (34.8) | 707 (8.8)   | 576 (81.5) | 131 (18.5) | 454 (5.6) | 392 (86.3) | 62 (13.7) | 8050 (100.0)            | 4529 (56.3) | 3521 (43.7) |
|                 | 2019 | 1414 (15.1) | 528 (37.3) | 886 (62.7) | 2135 (22.8) | 806 (37.8) | 1329 (62.2) | 2242 (23.9) | 1048 (46.7) | 1194 (53.3) | 2279 (24.3) | 1290 (56.6) | 989 (43.4) | 708 (7.6)   | 519 (73.3) | 189 (26.7) | 599 (6.4) | 505 (84.3) | 94 (15.7) | 9377 (100.0)            | 4696 (50.1) | 4681 (49.9) |

\*The “%” in the “Total” columns represents the proportion of all comprehensive FPs who belong to that age group. The “%” in the “M” and “F” columns represents the proportion who are male or female within that age group.

Supplemental eTable 2b. Practice characteristics of comprehensive family physicians by physician age and sex

|                             |      | <35 Years     |               |               | 35-44 Years    |                |                | 45-54 Years    |                 |                | 55-64 Years    |                |                | 65-69 Years    |                |                | 70+ Years      |                |               | All Comprehensive FPs |                |                |
|-----------------------------|------|---------------|---------------|---------------|----------------|----------------|----------------|----------------|-----------------|----------------|----------------|----------------|----------------|----------------|----------------|----------------|----------------|----------------|---------------|-----------------------|----------------|----------------|
|                             |      | Total         | M             | F             | Total          | M              | F              | Total          | M               | F              | Total          | M              | F              | Total          | M              | F              | Total          | M              | F             | All                   | M              | F              |
| Years in pract. (mean (SD)) | 2008 | 6.0 (±2.3)    | 6.3 (±2.3)    | 5.9 (±2.2)    | 14.4 (±3.9)    | 14.7 (±3.8)    | 14.1 (±3.9)    | 23.7 (±4.2)    | 23.8 (±4.2)     | 23.5 (±4.2)    | 33.4 (±4.4)    | 33.6 (±4.2)    | 32.8 (±4.8)    | 41.3 (±3.0)    | 41.2 (±3.0)    | 42.0 (±3.2)    | 48.0 (±5.1)    | 48.0 (±4.9)    | 47.8 (±6.4)   | 24.6 (±11.4)          | 27.3 (±11.2)   | 20.2 (±10.1)   |
|                             | 2013 | 5.7 (±2.1)    | 5.4 (±2.1)    | 5.9 (±2.1)    | 13.8 (±4.2)    | 14.0 (±4.2)    | 13.7 (±4.1)    | 23.9 (±4.2)    | 23.9 (±4.0)     | 23.8 (±4.4)    | 33.2 (±4.4)    | 33.6 (±4.4)    | 32.5 (±4.5)    | 41.2 (±3.5)    | 41.1 (±3.4)    | 41.6 (±4.0)    | 48.7 (±4.9)    | 48.7 (±4.9)    | 49.0 (±4.9)   | 25.6 (±12.3)          | 28.8 (±12.1)   | 21.4 (±11.1)   |
|                             | 2019 | 5.8 (±2.0)    | 5.7 (±2.0)    | 5.8 (±1.9)    | 12.5 (±4.2)    | 12.5 (±4.4)    | 12.5 (±4.0)    | 23.7 (±4.7)    | 23.9 (±4.7)     | 23.5 (±4.6)    | 33.3 (±4.7)    | 33.4 (±4.5)    | 33.2 (±4.9)    | 40.8 (±3.6)    | 41.0 (±3.4)    | 40.3 (±4.0)    | 48.5 (±5.1)    | 48.4 (±5.3)    | 48.7 (±4.1)   | 23.7 (±13.4)          | 27.0 (±13.8)   | 20.3 (±12.0)   |
| Roster size (mean (SD))     | 2008 | 638.3 (±62.2) | 790.7 (±72.2) | 553.9 (±54.2) | 1131.8 (±87.3) | 1323.5 (±98.1) | 946.7 (±70.7)  | 1345.1 (±92.0) | 1470.3 (±99.6)  | 1174.6 (±77.4) | 1494.0 (±94.5) | 1432.1 (±96.1) | 1222.7 (±85.6) | 1123.1 (±95.5) | 1186.1 (±98.1) | 770.7 (±70.1)  | 566.3 (±77.0)  | 584.9 (±78.5)  | 406.5 (±61.8) | 1212.8 (±92.7)        | 1338.8 (±99.1) | 1008.8 (±77.0) |
|                             | 2013 | 620.0 (±60.5) | 725.2 (±69.0) | 568.0 (±55.2) | 1152.8 (±83.6) | 1348.6 (±93.5) | 1019.7 (±73.2) | 1407.1 (±92.7) | 1567.8 (±101.3) | 1225.4 (±78.0) | 1490.2 (±89.4) | 1593.1 (±93.7) | 1297.2 (±77.2) | 1366.1 (±90.5) | 1420.3 (±92.1) | 1128.0 (±79.4) | 898.1 (±89.5)  | 946.7 (±92.2)  | 591.1 (±62.2) | 1272.1 (±90.9)        | 1425.0 (±97.5) | 1075.4 (±77.3) |
|                             | 2019 | 734.0 (±64.4) | 834.7 (±71.2) | 674.0 (±59.2) | 1074.5 (±72.0) | 1217.2 (±84.1) | 987.9 (±62.0)  | 1394.8 (±87.6) | 1529.3 (±94.6)  | 1276.7 (±79.1) | 1405.6 (±84.7) | 1531.6 (±90.2) | 1241.1 (±73.8) | 1434.4 (±90.0) | 1502.5 (±93.2) | 1247.6 (±77.7) | 1098.0 (±80.4) | 1125.7 (±81.5) | 949.2 (±72.9) | 1208.9 (±83.7)        | 1351.9 (±90.8) | 1065.4 (±73.1) |
| Core PC visits (mean (SD))  | 2008 | 6.2 (±2.7)    | 6.2 (±2.8)    | 6.2 (±2.7)    | 7.3 (±4.2)     | 7.5 (±5.6)     | 7.2 (±2.3)     | 7.3 (±2.3)     | 7.4 (±2.5)      | 7.3 (±2.1)     | 7.7 (±2.6)     | 7.7 (±2.6)     | 7.7 (±2.4)     | 7.5 (±3.1)     | 7.6 (±3.2)     | 6.9 (±2.7)     | 6.8 (±3.5)     | 6.9 (±3.5)     | 6.2 (±2.9)    | 7.3 (±3.1)            | 7.4 (±3.5)     | 7.1 (±2.4)     |
|                             | 2013 | 5.3 (±2.3)    | 5.4 (±2.3)    | 5.3 (±2.3)    | 6.3 (±2.1)     | 6.2 (±2.2)     | 6.3 (±2.0)     | 6.5 (±2.4)     | 6.6 (±2.7)      | 6.4 (±2.0)     | 6.7 (±2.8)     | 6.8 (±3.2)     | 6.4 (±1.9)     | 6.9 (±2.4)     | 6.9 (±2.4)     | 7.0 (±2.3)     | 7.3 (±4.0)     | 7.5 (±4.2)     | 6.5 (±2.4)    | 6.5 (±2.6)            | 6.6 (±2.9)     | 6.3 (±2.1)     |
|                             | 2019 | 5.6 (±2.5)    | 5.5 (±2.6)    | 5.6 (±2.4)    | 6.0 (±2.5)     | 5.9 (±2.8)     | 6.0 (±2.4)     | 6.1 (±2.1)     | 6.1 (±2.3)      | 6.1 (±1.9)     | 6.1 (±2.1)     | 6.2 (±2.3)     | 6.0 (±1.8)     | 6.4 (±2.2)     | 6.5 (±2.3)     | 6.2 (±2.0)     | 6.7 (±3.0)     | 6.5 (±2.9)     | 7.2 (±3.1)    | 6.0 (±2.3)            | 6.1 (±2.5)     | 6.0 (±2.2)     |
| Pt age (mean (SD))          | 2008 | 27.9 (±13.8)  | 29.4 (±14.0)  | 27.1 (±13.6)  | 31.7 (±11.7)   | 32.8 (±12.6)   | 30.5 (±10.7)   | 34.3 (±11.9)   | 35.4 (±12.5)    | 32.7 (±10.8)   | 36.7 (±13.1)   | 37.6 (±13.2)   | 33.7 (±12.2)   | 35.1 (±16.2)   | 36.0 (±16.1)   | 30.5 (±15.9)   | 28.2 (±18.5)   | 28.5 (±18.5)   | 25.5 (±17.8)  | 33.5 (±13.2)          | 34.9 (±13.8)   | 31.3 (±11.8)   |
|                             | 2013 | 28.2 (±13.7)  | 30.0 (±13.7)  | 27.4 (±13.6)  | 34.0 (±10.8)   | 35.0 (±11.6)   | 33.4 (±10.1)   | 36.4 (±10.7)   | 37.8 (±11.2)    | 34.8 (±9.9)    | 39.4 (±10.7)   | 40.5 (±11.1)   | 37.3 (±9.8)    | 40.9 (±12.6)   | 42.0 (±12.4)   | 36.3 (±12.7)   | 39.1 (±17.0)   | 39.7 (±17.1)   | 35.0 (±16.0)  | 36.5 (±12.1)          | 38.5 (±12.5)   | 34.0 (±11.2)   |
|                             | 2019 | 31.8 (±14.5)  | 33.5 (±14.2)  | 30.7 (±14.5)  | 36.4 (±10.9)   | 37.1 (±11.8)   | 36.0 (±10.3)   | 38.4 (±9.8)    | 39.4 (±10.6)    | 37.5 (±9.0)    | 40.6 (±10.5)   | 42.0 (±10.8)   | 38.7 (±9.8)    | 43.0 (±11.5)   | 43.9 (±11.6)   | 40.8 (±10.9)   | 43.3 (±14.3)   | 43.6 (±14.5)   | 41.2 (±13.1)  | 38.1 (±12.0)          | 40.0 (±12.3)   | 36.2 (±11.3)   |
| Prop. Fem. Pts (mean (SD))  | 2008 | 55.7 (±15.1)  | 46.9 (±10.7)  | 60.7 (±14.9)  | 55.2 (±13.2)   | 46.2 (±7.5)    | 63.8 (±11.6)   | 54.3 (±13.0)   | 46.3 (±7.4)     | 65.3 (±10.9)   | 51.0 (±11.0)   | 46.8 (±7.0)    | 65.0 (±10.7)   | 49.5 (±11.1)   | 47.3 (±8.5)    | 61.5 (±15.7)   | 47.8 (±13.2)   | 46.7 (±11.1)   | 57.6 (±22.6)  | 53.2 (±12.9)          | 46.6 (±7.8)    | 64.0 (±12.1)   |
|                             | 2013 | 55.3 (±15.6)  | 47.8 (±13.7)  | 59.0 (±15.1)  | 55.1 (±12.1)   | 46.1 (±8.3)    | 61.2 (±10.4)   | 53.7 (±12.3)   | 45.6 (±7.4)     | 62.9 (±9.9)    | 52.4 (±12.1)   | 45.9 (±7.5)    | 64.7 (±9.3)    | 48.9 (±10.1)   | 45.9 (±7.2)    | 62.2 (±10.5)   | 49.6 (±12.2)   | 47.2 (±10.4)   | 64.8 (±11.9)  | 53.1 (±12.5)          | 46.1 (±8.3)    | 62.3 (±11.0)   |
|                             | 2019 | 54.3 (±13.7)  | 47.7 (±11.2)  | 58.2 (±13.6)  | 54.3 (±11.8)   | 45.0 (±8.2)    | 59.9 (±10.0)   | 53.5 (±11.2)   | 45.4 (±7.6)     | 60.6 (±8.9)    | 52.4 (±11.8)   | 44.8 (±7.8)    | 62.2 (±8.5)    | 49.9 (±11.7)   | 45.1 (±7.9)    | 63.0 (±10.2)   | 48.2 (±9.9)    | 45.9 (±8.1)    | 60.7 (±9.6)   | 52.9 (±12.0)          | 45.5 (±8.4)    | 60.4 (±10.3)   |

|                    |      |               |               |               |                |               |               |                |                |               |                |                |               |               |               |               |               |               |              |                |                |                |
|--------------------|------|---------------|---------------|---------------|----------------|---------------|---------------|----------------|----------------|---------------|----------------|----------------|---------------|---------------|---------------|---------------|---------------|---------------|--------------|----------------|----------------|----------------|
| FTE<br>(N<br>(%)*) | 2008 | 290<br>(49.0) | 146<br>(50.3) | 144<br>(49.7) | 1210<br>(64.5) | 754<br>(62.3) | 456<br>(37.7) | 1802<br>(73.0) | 1173<br>(65.1) | 629<br>(34.9) | 1481<br>(75.1) | 1209<br>(81.6) | 272<br>(18.4) | 239<br>(58.4) | 220<br>(92.1) | 19<br>(8.0)   | 114<br>(32.0) | 107<br>(93.9) | 7 (6.1)      | 5136<br>(66.9) | 3609<br>(70.3) | 1527<br>(29.7) |
|                    | 2013 | 335<br>(45.4) | 152<br>(45.4) | 183<br>(54.6) | 1073<br>(64.4) | 556<br>(51.8) | 517<br>(48.2) | 1694<br>(73.3) | 1014<br>(59.9) | 680<br>(40.1) | 1634<br>(75.3) | 1156<br>(70.8) | 478<br>(29.3) | 474<br>(67.0) | 415<br>(87.6) | 59<br>(12.5)  | 189<br>(41.6) | 177<br>(93.7) | 12<br>(6.4)  | 5399<br>(67.1) | 3470<br>(64.3) | 1929<br>(35.7) |
|                    | 2019 | 734<br>(51.9) | 351<br>(47.8) | 383<br>(52.2) | 1401<br>(65.6) | 628<br>(44.8) | 773<br>(55.2) | 1722<br>(76.8) | 881<br>(51.2)  | 841<br>(48.8) | 1681<br>(73.8) | 1052<br>(62.6) | 629<br>(37.4) | 514<br>(72.6) | 402<br>(78.2) | 112<br>(21.8) | 327<br>(54.6) | 288<br>(88.1) | 39<br>(11.9) | 6379<br>(68.0) | 3602<br>(56.5) | 2777<br>(43.5) |

Comp. FPs: Comprehensive family physicians; Pract.: Practice; PC: Primary care; Pt(s): Patient(s); Prop: Proportion; Fem: Female; FTE: Comp FPs practicing full-time equivalent

\*For the covariate "FTE", the "%" in the "Total" columns represents the proportion of all comprehensive FPs in that age group who are FTE. The "%" in the "M" and "F" columns represents the proportion of FTE physicians in that age group who are male or female.
