# Supplementary material for: Characteristics of patients attached to near-retirement family physicians: a population-based serial cross-sectional study in Ontario, Canada
Source: PubMed Central journal article supplement — BMJ Open. 2023 Dec 7;13(12):e074120. doi: 10.1136/bmjopen-2023-074120 (PMC10711930; doi:10.1136/bmjopen-2023-074120), 2023-12-07
Supplement: bmjopen-2023-074120supp006.pdf [file bmjopen-2023-074120supp006.pdf]

Supplemental eTable 3. Comprehensive family physician practice model over time by physician age and sex

| Year | Model | Total |      | Age < 35   |      | Total      |      | Age 35 - 44 |      | Total      |      | Age 45 - 54 |      | Total |      | Age 55 - 64 |      | Total      |      | Age 65 - 69 |      | Total |      | Age 70+  |      | Total  |      | Total Sample |      |          |      |      |      |            |      |          |      |      |      |      |      |      |      |
|------|-------|-------|------|------------|------|------------|------|-------------|------|------------|------|-------------|------|-------|------|-------------|------|------------|------|-------------|------|-------|------|----------|------|--------|------|--------------|------|----------|------|------|------|------------|------|----------|------|------|------|------|------|------|------|
|      |       | N     | %    | N          | %    | N          | %    | N           | %    | N          | %    | N           | %    | N     | %    | N           | %    | N          | %    | N           | %    | N     | %    | N        | %    | N      | %    | N            | %    | N        | %    |      |      |            |      |          |      |      |      |      |      |      |      |
| 2008 | EFFS  | 243   | 4.1  | 91         | 43.1 | 152        | 39.9 | 1009        | 53.8 | 513        | 55.6 | 496         | 51.9 | 1410  | 57.2 | 796         | 56   | 614        | 58.8 | 1184        | 60   | 903   | 50.3 | 281      | 62.4 | 210    | 51.3 | 174          | 50.1 | 36       | 58.1 | 142  | 39.9 | 129        | 40.4 | 13       | 35.1 | 4198 | 54.7 | 2606 | 54.9 | 1592 | 54.3 |
|      | CAP   | 56    | 9.5  | *11 - 15   |      | *43 - 47   |      | 167         | 8.9  | 70         | 7.6  | 97          | 10.2 | 191   | 7.7  | 114         | 8    | 77         | 7.4  | *128-132    |      | 104   | 6.8  | *24 - 28 |      | *30-34 |      | *27 - 31     |      | *1 - 5   |      | 7    | 2    | 7          | 2.2  | 0        | 0    | 583  | 7.6  | 337  | 7.1  | 246  | 8.4  |
|      | FHT   | 85    | 14.4 | 35         | 16.6 | 50         | 13.1 | 281         | 15   | 126        | 13.7 | 155         | 16.2 | 402   | 16.3 | 228         | 16   | 174        | 16.7 | *276-280    |      | 228   | 15   | *48 - 52 |      | 48     | 11.7 | *43-47       |      | *1 - 5   |      | 17   | 4.8  | *12-16     |      | *1 - 5   |      | 1113 | 14.5 | 680  | 14.3 | 433  | 14.8 |
|      | NOG   | 198   | 33.4 | 69         | 32.7 | 129        | 33.9 | 389         | 20.7 | 202        | 21.9 | 187         | 19.6 | 427   | 17.3 | 256         | 18   | 171        | 16.4 | 396         | 18.1 | 268   | 17.6 | 88       | 19.6 | 118    | 28.9 | *94-98       |      | *20 - 24 |      | 190  | 53.4 | *163-167   |      | *23 - 27 |      | 1678 | 21.9 | 1056 | 22.3 | 622  | 21.2 |
|      | OGP   | 10    | 1.7  | *1-5       |      | *3 - 7     |      | 31          | 1.7  | 11         | 1.2  | 20          | 2.1  | 37    | 1.5  | 28          | 2    | 9          | 0.9  | *20-24      |      | 19    | 1.2  | *1-5     |      | *1-5   |      | 0            | 0    | 0        | 0    | 0    | 0    | 0          | 0    | 101      | 1.3  | 64   | 1.3  | 37   | 1.3  |      |      |
| 2013 | EFFS  | 162   | 21.9 | 65         | 26.5 | 97         | 19.6 | 571         | 34.3 | 243        | 36.1 | 328         | 33.1 | 853   | 36.9 | 464         | 37.8 | 389        | 35.9 | 766         | 35.3 | 481   | 34   | 285      | 37.7 | 292    | 41.3 | 218          | 37.8 | 74       | 56.5 | 173  | 38.1 | 149        | 38   | 24       | 38.7 | 2817 | 35   | 1620 | 35.8 | 1197 | 34   |
|      | CAP   | 108   | 14.6 | *28 - 32   |      | *76-80     |      | 361         | 21.7 | *127 - 131 |      | *229 - 233  |      | 582   | 25.2 | 310         | 25.3 | 272        | 25.1 | 603         | 27.8 | 407   | 28.8 | 196      | 26   | 168    | 23.8 | 146          | 25.3 | 22       | 16.8 | 75   | 16.5 | *65-69     |      | *6 - 10  |      | 1897 | 23.6 | 1091 | 24.1 | 806  | 22.9 |
|      | FHT   | 186   | 25.1 | 64         | 26.1 | 122        | 24.6 | 461         | 27.7 | 183        | 27.2 | *276 - 280  |      | 547   | 23.7 | *266-270    |      | *277 - 281 |      | 501         | 23.1 | 325   | 23   | 176      | 23.3 | 127    | 18   | 114          | 19.8 | 13       | 9.9  | 55   | 12.1 | *50-54     |      | *1 - 5   |      | 1877 | 23.3 | 1007 | 22.2 | 870  | 24.7 |
|      | NOG   | 277   | 37.4 | 83         | 33.9 | 194        | 39.1 | 266         | 16   | 116        | 17.2 | 150         | 15.1 | 313   | 13.5 | 172         | 14   | 141        | 13   | 273         | 12.6 | 183   | 12.9 | 90       | 11.9 | 110    | 15.6 | 88           | 15.3 | 22       | 16.8 | 151  | 33.3 | 124        | 31.6 | 27       | 43.5 | 1390 | 17.3 | 766  | 16.9 | 624  | 17.7 |
|      | OGP   | 8     | 1.1  | *1-5       |      | *3-7       |      | 7           | 0.4  | *1-5       |      | *2 - 6      |      | 17    | 0.7  | *11-15      |      | *2 - 6     |      | 27          | 1.2  | 19    | 1.3  | 8        | 1.1  | 10     | 1.4  | 10           | 1.7  | 0        | 0    | 0    | 0    | 0          | 0    | 0        | 0    | 69   | 0.9  | 45   | 1    | 24   | 0.7  |
| 2019 | EFFS  | 249   | 17.6 | *103 - 107 |      | *144 - 148 |      | 518         | 24.3 | 218        | 27   | 300         | 22.6 | 712   | 31.8 | *348 - 352  |      | *360-364   |      | 707         | 31   | 408   | 31.6 | 299      | 30.2 | 244    | 34.5 | *163 - 167   |      | *75 - 79 |      | 239  | 39.9 | *190 - 194 |      | 48       | 51.1 | 2669 | 28.5 | 1437 | 30.6 | 1232 | 26.3 |
|      | CAP   | 341   | 24.1 | 124        | 23.5 | 217        | 24.5 | 597         | 28   | 193        | 23.9 | 404         | 30.4 | 699   | 31.2 | 315         | 30.1 | 384        | 32.2 | 725         | 31.8 | 399   | 30.9 | 326      | 33   | 221    | 31.2 | 176          | 33.9 | 45       | 23.8 | 165  | 27.5 | 146        | 28.9 | 19       | 20.2 | 2748 | 29.3 | 1353 | 28.8 | 1395 | 29.8 |
|      | FHT   | 376   | 26.6 | *37        | 25.9 | 239        | 27   | 683         | 32   | 252        | 31.3 | 431         | 32.4 | 583   | 26   | 265         | 24.3 | 328        | 27.5 | 577         | 25.3 | 321   | 24.9 | 256      | 25.9 | 151    | 21.3 | 109          | 21   | 42       | 22.2 | 79   | 13.2 | *71        | 14.1 | 8        | 8.5  | 2448 | 26.1 | 1145 | 24.4 | 1304 | 27.9 |
|      | NOG   | 437   | 30.9 | 157        | 29.7 | 280        | 31.6 | 148         | 133  | 16.5       | 183  | 13.8        | 237  | 10.8  | 123  | 11.7        | 114  | 9.5        | 241  | 10.6        | 141  | 10.9  | 100  | 10.1     | 82   | 11.6   | 64   | 12.3         | 22   | 11.8     | 112  | 18.7 | 93   | 18.4       | 19   | 20.2     | 1429 | 15.2 | 711  | 15.1 | 718  | 15.3 |      |
|      | OGP   | 11    | 0.8  | *3 - 7     |      | *2 - 6     |      | 21          | 1    | 10         | 1.2  | 11          | 0.8  | 11    | 0.5  | *3 - 7      |      | *4-8       |      | 29          | 1.3  | 21    | 1.6  | 8        | 0.8  | *6-10  |      | *3 - 7       |      | *1-5     |      | *1-5 |      | 82         | 0.9  | 50       | 1.1  | 32   | 0.7  |      |      |      |      |

Percentages are column percentages

Ranges preceded by an asterisk (\*) represent suppressed cells due to small cell sizes

EFFS: Enhanced fee-for-service. This is a fee-for-service payment model that requires patient enrollment and includes some pay enhancements, such as higher fee-for-service payments for enrolled patients and bonus payments for preventive care targets.

CAP: Capitation. An alternate payment plan (APP) model where the majority of physician payments come from an annual amount for each enrolled patient adjusted for patient age and sex.

FHT: Capitation models with additional funding for interdisciplinary team members such as nurse practitioners and social workers.

NOG: No group. These physicians are paid via traditional fee-for-service, without any enrollment requirements or pay enhancements.

OGP: Other physician group types, typically serving a specific targeted population or geography (for example, rural/remote) with varying funding mechanisms.
