# Supplementary material for: Characteristics of patients attached to near-retirement family physicians: a population-based serial cross-sectional study in Ontario, Canada
Source: PubMed Central journal article supplement — BMJ Open. 2023 Dec 7;13(12):e074120. doi: 10.1136/bmjopen-2023-074120 (PMC10711930; doi:10.1136/bmjopen-2023-074120), 2023-12-07
Supplement: bmjopen-2023-074120supp007.pdf [file bmjopen-2023-074120supp007.pdf]

**Supplemental eTable 4. Geographic Distribution of Comprehensive FPs*****A. Comprehensive FPs by Geography***

|                            | Large Urban  | Urban        | Small Urban/Suburban | Rural/Remote | Total         |
|----------------------------|--------------|--------------|----------------------|--------------|---------------|
| <b>2008</b>                |              |              |                      |              |               |
| N (% of Comprehensive FPs) | 3,909 (51.1) | 1,990 (26.0) | 1,236 (16.2)         | 513 (6.7)    | 7,648 (100.0) |
| <b>2013</b>                |              |              |                      |              |               |
| N (% of Comprehensive FPs) | 4,105 (51.1) | 2,314 (28.8) | 1,207 (15.0)         | 410 (5.1)    | 8,036 (100.0) |
| <b>2019</b>                |              |              |                      |              |               |
| N (% of Comprehensive FPs) | 4,674 (50.0) | 2,685 (28.7) | 14,98 (16.0)         | 492 (5.3)    | 9,349 (100.0) |

Note: Geographic data missing for: 2008 (25), 2013 (14), 2019 (28)

***B. Rural (RIO 40+) Comprehensive FPs by Age Group***

|                                  | <35 years | 35-44 years | 45-54 years | 55-64 years | 65-69 years | 70+ years | Total       |
|----------------------------------|-----------|-------------|-------------|-------------|-------------|-----------|-------------|
| <b>2008</b>                      |           |             |             |             |             |           |             |
| N (% of rural comprehensive FPs) | 46 (9.0)  | 135 (26.3)  | 166 (32.4)  | 118 (23.0)  | 27 (5.3)    | 21 (4.1)  | 513 (100.0) |
| <b>2013</b>                      |           |             |             |             |             |           |             |
| N (% of rural comprehensive FPs) | 31 (7.6)  | 76 (18.5)   | 109 (26.6)  | 129 (31.5)  | 44 (10.7)   | 21 (5.1)  | 410 (100.0) |
| <b>2019</b>                      |           |             |             |             |             |           |             |
| N (% of rural comprehensive FPs) | 89 (18.1) | 111 (22.6)  | 121 (24.6)  | 117 (23.8)  | 32 (6.5)    | 22 (4.5)  | 492 (100.0) |

***C. Rural (RIO 40+) Comprehensive FPs by Physicians Sex***

|             | Male Physicians |                              |                            | Female Physicians |                              |                            | Total Rural | All Comprehensive FPs      |      |                            |
|-------------|-----------------|------------------------------|----------------------------|-------------------|------------------------------|----------------------------|-------------|----------------------------|------|----------------------------|
|             | N               | % of Rural Comprehensive FPs | % of all Comprehensive FPs | N                 | % of Rural Comprehensive FPs | % of all Comprehensive FPs | N           | % of all Comprehensive FPs | N    | % of all Comprehensive FPs |
| <b>2008</b> | 362             | 70.6                         | 4.7                        | 151               | 29.4                         | 2                          | 513         | 6.7                        | 7648 | 6.7                        |
| <b>2013</b> | 268             | 65.4                         | 3.3                        | 142               | 34.6                         | 1.8                        | 410         | 5.1                        | 8036 | 5.1                        |
| <b>2019</b> | 279             | 56.7                         | 3                          | 213               | 43.3                         | 2.3                        | 492         | 5.3                        | 9349 | 5.3                        |

We were unable to stratify by both age and sex due to suppressed cells (cell sizes <6) in older age categories for male and female physicians in the rural category.

Large urban: Rurality Index of Ontario (RIO) score of 0

Urban: RIO score of 1-9

Suburban/Small Urban: RIO score of 10-39

Rural/remote: RIO score of 40+
