# Supplementary material for: Characteristics of patients attached to near-retirement family physicians: a population-based serial cross-sectional study in Ontario, Canada
Source: PubMed Central journal article supplement — BMJ Open. 2023 Dec 7;13(12):e074120. doi: 10.1136/bmjopen-2023-074120 (PMC10711930; doi:10.1136/bmjopen-2023-074120), 2023-12-07
Supplement: bmjopen-2023-074120supp008.pdf [file bmjopen-2023-074120supp008.pdf]

**Supplemental eTable 5. Practice characteristics: Medical and social complexity of patients attached to comprehensive family physicians over time by physician age and sex**

|                                                           |      | <35 Years |      |      | 35-44 Years |      |      | 45-54 Years |      |      | 55-64 Years |      |      | 65-69 Years |      |      | 70+ Years |      |      | TOTAL |      |      |
|-----------------------------------------------------------|------|-----------|------|------|-------------|------|------|-------------|------|------|-------------|------|------|-------------|------|------|-----------|------|------|-------|------|------|
|                                                           |      | Total     | M    | F    | Total       | M    | F    | Total       | M    | F    | Total       | M    | F    | Total       | M    | F    | Total     | M    | F    | Total | M    | F    |
|                                                           |      | %         | %    | %    | %           | %    | %    | %           | %    | %    | %           | %    | %    | %           | %    | %    | %         | %    | %    | %     | %    | %    |
| <b>Highest morbidity (RUB (4+))</b>                       | 2008 | 15.3      | 14.7 | 15.6 | 16.2        | 15.8 | 16.7 | 16.4        | 16.5 | 16.2 | 17.3        | 17.5 | 16.6 | 16.8        | 17.2 | 14.0 | 14.0      | 14.1 | 13.0 | 16.5  | 16.7 | 16.3 |
|                                                           | 2013 | 17.5      | 17.6 | 17.4 | 18.2        | 17.5 | 18.7 | 17.7        | 17.8 | 17.6 | 18.1        | 18.5 | 17.3 | 19.5        | 20.0 | 17.5 | 20.1      | 20.5 | 17.9 | 18.1  | 18.3 | 17.8 |
|                                                           | 2019 | 19.3      | 19.4 | 19.2 | 20.6        | 20.2 | 20.8 | 19.4        | 19.4 | 19.4 | 19.5        | 20.2 | 18.7 | 20.3        | 20.4 | 20.1 | 21.4      | 21.5 | 21.3 | 19.8  | 19.9 | 19.7 |
| <b>Lowest income quintile</b>                             | 2008 | 18.5      | 19.2 | 18.1 | 18.1        | 19.6 | 16.6 | 18.4        | 19.8 | 16.4 | 19.9        | 20.2 | 18.8 | 22.6        | 22.5 | 23.6 | 23.9      | 20.1 | 17.2 | 19.0  | 20.1 | 17.2 |
|                                                           | 2013 | 18.9      | 20.6 | 18.0 | 17.2        | 19.1 | 16.0 | 18.0        | 19.4 | 16.4 | 18.4        | 19.5 | 16.5 | 20.5        | 20.4 | 21.2 | 24.0      | 24.2 | 22.5 | 18.3  | 19.6 | 16.7 |
|                                                           | 2019 | 20.4      | 21.9 | 20.7 | 18.8        | 20.7 | 17.6 | 18.3        | 20.5 | 16.5 | 18.8        | 20.4 | 16.8 | 19.9        | 20.7 | 17.9 | 22.1      | 22.2 | 21.4 | 19.0  | 20.7 | 17.5 |
| <b>Highest housing instability quintile</b>               | 2008 | 24.5      | 22.8 | 25.5 | 20.6        | 20.7 | 20.4 | 20.4        | 20.4 | 20.4 | 21.9        | 21.6 | 23.0 | 24.0        | 23.1 | 29.2 | 25.5      | 25.6 | 24.2 | 21.4  | 21.2 | 21.7 |
|                                                           | 2013 | 26.0      | 23.6 | 27.2 | 21.8        | 20.9 | 22.5 | 19.9        | 20.4 | 19.4 | 20.8        | 20.6 | 21.3 | 21.7        | 21.8 | 21.2 | 24.5      | 24.1 | 26.6 | 21.4  | 20.9 | 21.9 |
|                                                           | 2019 | 26.5      | 25.3 | 27.2 | 24.5        | 24.7 | 24.5 | 21.1        | 21.8 | 20.4 | 21.4        | 21.5 | 21.3 | 22.6        | 21.7 | 24.9 | 25.5      | 25.2 | 27.1 | 23.0  | 22.7 | 23.3 |
| <b>Highest material deprivation quintile</b>              | 2008 | 18.6      | 19.8 | 17.9 | 17.4        | 19.3 | 15.5 | 18.2        | 20.1 | 15.6 | 20.5        | 21.3 | 18.1 | 23.7        | 23.9 | 22.4 | 25.7      | 26.2 | 21.3 | 19.0  | 20.6 | 16.4 |
|                                                           | 2013 | 22.9      | 24.6 | 22.0 | 20.5        | 22.1 | 19.4 | 21.2        | 22.9 | 19.3 | 21.4        | 22.6 | 19.2 | 23.7        | 23.2 | 25.7 | 29.2      | 29.4 | 27.8 | 21.5  | 22.8 | 19.9 |
|                                                           | 2019 | 18.2      | 19.7 | 17.3 | 17.3        | 19.9 | 15.8 | 17.0        | 19.3 | 15.0 | 18.1        | 19.8 | 15.9 | 19.7        | 20.9 | 16.7 | 21.8      | 22.1 | 19.9 | 17.8  | 19.8 | 15.9 |
| <b>Highest neighborhood ethnic concentration quintile</b> | 2008 | 27.4      | 30.8 | 25.5 | 27.5        | 28.4 | 26.5 | 26.0        | 26.1 | 25.9 | 27.2        | 26.3 | 30.4 | 28.0        | 26.4 | 37.2 | 32.6      | 32.8 | 30.7 | 26.9  | 26.9 | 27.0 |
|                                                           | 2013 | 29.9      | 31.1 | 29.2 | 28.6        | 29.2 | 28.2 | 27.9        | 29.2 | 26.6 | 27.2        | 27.2 | 27.3 | 27.7        | 25.5 | 37.3 | 33.0      | 32.0 | 39.4 | 28.0  | 28.1 | 28.0 |
|                                                           | 2019 | 26.0      | 26.6 | 25.7 | 25.8        | 27.2 | 25.0 | 28.5        | 29.2 | 27.8 | 27.0        | 26.8 | 27.3 | 33.2        | 33.7 | 31.9 | 32.1      | 30.9 | 38.5 | 27.4  | 28.3 | 26.7 |

Interpretation: For example, in 2008, within the group of comprehensive family physicians under the age of 35 years, 15.3% of patients in those practices had the highest level of morbidity (RUB 4+). When further stratified by physician sex, 14.7% of patients attached to male comprehensive family physicians belonged to the highest morbidity (RUB 4+) group.

RUB: Morbidity, based on Resource Utilization Band
